# Supplementary material for: Solvation stabilizes intercarbonyl n→π* interactions and polyproline II helix
Source: Royal Society of Chemistry journal article supplement (doi:10.1039/d2cp00857b), 2022-01-01
Supplement: d2cp00857b1.pdf [file d2cp00857b1.pdf]

## Supporting Information

Solvation stabilizes intercarbonyl  $n \rightarrow \pi^*$  interactions and polyproline II helix

Neal J. Zondlo\*

Department of Chemistry and Biochemistry

University of Delaware

Newark, DE 19716

United States

## Contents

- S2. Comparison of interaction energies determined by MP2 versus CCSD(T)
- S3. Energies in hartrees for all geometry-optimized structures and additional characterization
- S9. Coordinates of all geometry-optimized structures
  - S9. Coordinates of small molecule structures
  - S27. Coordinates of structures of Ac-Pro-NMe<sub>2</sub> as a function of conformation and solvation
  - S89. Coordinates of structures of Ac-Ala-NMe<sub>2</sub> as a function of conformation and solvation
  - S116. Coordinates of structures of Ac-Pro<sub>2</sub>-NMe<sub>2</sub> as a function of conformation and solvation

**Table S1.** Comparison of calculated formaldehyde dimer interaction energies ( $\Delta E_{\text{int}}$ ) using either the MP2 method or the CCSD(T) method, with the jul-cc-pV5Z basis set in implicit water. These energies do not include a correction for basis-set superposition error (BSSE).

| interaction | groups on C=O |                 | <i>d</i> | $\Delta E_{\text{int}}$ , kcal mol <sup>-1</sup><br>jul-cc-pV5Z<br>implicit H <sub>2</sub> O |         |
|-------------|---------------|-----------------|----------|----------------------------------------------------------------------------------------------|---------|
|             | donor         | acceptor        |          | MP2                                                                                          | CCSD(T) |
| HCHO·HCHO   | –             | –               | 2.835    | -1.40                                                                                        | -1.38   |
| HCHO·HCHO   | HF            | –               | 2.883    | -1.20                                                                                        | -1.18   |
| HCHO·HCHO   | –             | HF              | 2.677    | -2.05                                                                                        | -2.03   |
| HCHO·HCHO   | –             | H <sup>+</sup>  | 1.567    | -18.01                                                                                       | -17.45  |
| HCHO·HCHO   | –             | Li <sup>+</sup> | 2.714    | -2.20                                                                                        | -1.96   |
| HCHO·HCHO   | –             | Na <sup>+</sup> | 2.760    | -1.80                                                                                        | -1.78   |
| HCHO·HCHO   | –             | K <sup>+</sup>  | 2.781    | -1.63                                                                                        | -1.61   |

**Table S2.** Energies of small molecules and of the formaldehyde dimer as a function of explicit solvation. Structures were generated via geometry optimization using the MP2 method with the aug-cc-pVTZ basis set in implicit water (IEFPCM). Energies and dipole moments ( $\mu$ , Debye (D)) were determined using the MP2 method with the jul-cc-pV5Z basis set in implicit water.

| structure                                                          | solvation                         |                                   | $\mu$ , D | $E$ , hartrees | hydrogen bond                                        | $n \rightarrow \pi^*$ interaction                                              |
|--------------------------------------------------------------------|-----------------------------------|-----------------------------------|-----------|----------------|------------------------------------------------------|--------------------------------------------------------------------------------|
|                                                                    | donor C=O                         | acceptor C=O                      |           |                | energy (H <sub>2</sub> O),<br>kcal mol <sup>-1</sup> | energy (H <sub>2</sub> O), $\Delta E_{\text{int}}$ ,<br>kcal mol <sup>-1</sup> |
| <b>small molecules</b>                                             |                                   |                                   |           |                |                                                      |                                                                                |
| HF                                                                 |                                   |                                   | 2.1       | -100.3858432   |                                                      |                                                                                |
| H <sub>2</sub> O                                                   |                                   |                                   | 2.3       | -76.3666412    |                                                      |                                                                                |
| HCHO                                                               |                                   |                                   | 3.6       | -114.3652428   |                                                      |                                                                                |
| urea                                                               |                                   |                                   | 6.0       | -225.0111957   |                                                      |                                                                                |
| thiourea                                                           |                                   |                                   | 8.1       | -547.5833603   |                                                      |                                                                                |
| guanidinium                                                        |                                   |                                   | 0.1       | -205.5741383   |                                                      |                                                                                |
| H <sub>2</sub> O•H <sub>2</sub> O (lower dipole moment structure)  |                                   |                                   | 3.6       | -152.7396691   | -4.01                                                | <sup>a</sup>                                                                   |
| H <sub>2</sub> O•H <sub>2</sub> O (higher dipole moment structure) |                                   |                                   | 4.9       | -152.7396744   | -4.01                                                | <sup>a</sup>                                                                   |
| <b>solvated formaldehyde</b>                                       |                                   |                                   |           |                |                                                      |                                                                                |
| HCHO                                                               | HF                                |                                   | 6.2       | -214.7636148   | -7.86                                                |                                                                                |
| HCHO                                                               | HF HF                             |                                   | 7.4       | -315.1584774   | -13.52                                               |                                                                                |
| HCHO                                                               | HF HF HF                          |                                   | 8.4       | -415.5438695   | -13.24                                               |                                                                                |
| HCHO                                                               | HF HF HF HF                       |                                   | 9.6       | -515.9300256   | -13.43                                               |                                                                                |
| HCHO                                                               | H <sub>2</sub> O                  |                                   | 5.2       | -190.7376407   | -3.61                                                |                                                                                |
| HCHO                                                               | H <sub>2</sub> O H <sub>2</sub> O |                                   | 6.8       | -267.1093588   | -6.80                                                |                                                                                |
| HCHO                                                               | urea                              |                                   | 10.4      | -339.3835702   | -4.48                                                |                                                                                |
| HCHO                                                               | thiourea                          |                                   | 12.8      | -661.9568991   | -5.21                                                |                                                                                |
| HCHO                                                               | guanidinium                       |                                   | 1.7       | -319.9495627   | -6.39                                                |                                                                                |
| HCHO                                                               | H <sup>+</sup>                    |                                   | 2.7       | -114.7493453   |                                                      |                                                                                |
| HCHO                                                               | Li <sup>+</sup>                   |                                   | 7.5       | -121.7978689   |                                                      |                                                                                |
| HCHO                                                               | Na <sup>+</sup>                   |                                   | 5.7       | -276.2029433   |                                                      |                                                                                |
| HCHO                                                               | K <sup>+</sup>                    |                                   | 6.1       | -713.5084525   |                                                      | <sup>b</sup>                                                                   |
| <b>formaldehyde dimer</b>                                          |                                   |                                   |           |                |                                                      |                                                                                |
| HCHO•HCHO                                                          | –                                 | –                                 | 7.3       | -228.7327149   |                                                      | -1.40                                                                          |
| HCHO•HCHO                                                          | HF                                | –                                 | 9.7       | -329.1307738   |                                                      | -1.20                                                                          |
| HCHO•HCHO                                                          | –                                 | HF                                | 9.8       | -329.1321248   |                                                      | -2.05                                                                          |
| HCHO•HCHO                                                          | HF                                | HF                                | 12.4      | -429.5298231   |                                                      | -1.63                                                                          |
| HCHO•HCHO                                                          | –                                 | HF HF                             | 11.2      | -429.5281456   |                                                      | -2.78                                                                          |
| HCHO•HCHO                                                          | HF                                | HF HF                             | 13.7      | -529.9254490   |                                                      | -2.11                                                                          |
| HCHO•HCHO                                                          | H <sub>2</sub> O                  | –                                 | 8.6       | -305.1050026   |                                                      | -1.33                                                                          |
| HCHO•HCHO                                                          | –                                 | H <sub>2</sub> O                  | 8.5       | -305.1055694   |                                                      | -1.69                                                                          |
| HCHO•HCHO                                                          | –                                 | H <sub>2</sub> O H <sub>2</sub> O | 9.2       | -381.4777857   |                                                      | -2.00                                                                          |
| HCHO•HCHO                                                          | H <sub>2</sub> O                  | H <sub>2</sub> O                  | 10.2      | -381.4779789   |                                                      | -1.69                                                                          |
| HCHO•HCHO                                                          | HF                                | H <sub>2</sub> O H <sub>2</sub> O | 11.2      | -481.8756297   |                                                      | -1.67                                                                          |
| HCHO•HCHO                                                          | H <sub>2</sub> O                  | H <sub>2</sub> O H <sub>2</sub> O | 10.6      | -457.8502724   |                                                      | -2.05                                                                          |
| HCHO•HCHO                                                          | –                                 | urea                              | 14.2      | -453.7516156   |                                                      | -1.76                                                                          |
| HCHO•HCHO                                                          | –                                 | thiourea                          | 16.7      | -776.3250734   |                                                      | -1.84                                                                          |
| HCHO•HCHO                                                          | –                                 | guanidinium                       | 4.1       | -434.3180239   |                                                      | -2.02                                                                          |
| HCHO•HCHO                                                          | –                                 | H <sup>+</sup>                    | 4.6       | -229.1432872   |                                                      | -18.01                                                                         |
| HCHO•HCHO                                                          | –                                 | Li <sup>+</sup>                   | 9.8       | -236.1666230   |                                                      | -2.20                                                                          |
| HCHO•HCHO                                                          | –                                 | Na <sup>+</sup>                   | 9.0       | -390.5710589   |                                                      | -1.80                                                                          |
| HCHO•HCHO                                                          | –                                 | K <sup>+</sup>                    | 8.0       | -827.8762935   |                                                      | -1.63                                                                          |

<sup>a</sup> Two structures of the hydrogen-bonded water dimer were analyzed: one with a lower overall dipole moment (non-hydrogen-bonded hydrogen atoms pointed in opposite directions, which is the energy minimum in the gas phase; 3.5 Debye in water) and one with a higher overall dipole moment (non-hydrogen-bonded hydrogen atoms pointed in the same direction; 4.8 Debye in

water). While these structures differ significantly in energy in the gas phase (counterpoise BSSE-corrected interaction energies of  $-4.85$  and  $-4.22$  kcal mol $^{-1}$ , respectively), the interaction energies are identical in implicit water ( $-4.01$  and  $-4.01$  kcal mol $^{-1}$ , respectively). These energies were determined by the MP2 method with the jul-cc-pV5Z basis set, on the structures optimized by the MP2 method with the aug-cc-pVTZ basis set in implicit water. Using the CCSD(T) method and the jul-cc-pV5Z basis set in implicit water, similar interaction energies were also obtained ( $-4.01$  and  $-4.00$  kcal mol $^{-1}$ , respectively).

For the water dimer structures, hydrogen bond energies were determined by subtracting the energy of two water molecules from the energy of the water dimer:

$$\Delta E_{\text{H-bond}} = E_{\text{H}_2\text{O dimer}} - 2E_{\text{H}_2\text{O}}$$

For solvated formaldehyde, hydrogen bond energies were determined by subtracting the energy of formaldehyde and the energy (energies) of the individual solvating hydrogen-bond donor molecule(s) from the energy of the hydrogen-bonded complex:

$$\Delta E_{\text{H-bond}} = E_{\text{complex}} - E_{\text{HCHO}} - \sum E_{\text{solvating molecules}}$$

<sup>b</sup> For structures with K<sup>+</sup>, the 6-311++G(3d,3p) basis set was used for K and the aug-cc-pVTZ basis set was used for all other atoms in geometry optimization; and the Def2QZVP basis set was used for K and the jul-cc-pV5Z basis set was used for all other atoms in energy calculations.

<sup>c</sup> n $\rightarrow$  $\pi^*$  interaction energies were determined by subtracting the energies of the component solvated formaldehyde molecules from the total energy of the formaldehyde dimer complex:

$$\Delta E_{\text{interaction}} = \Delta E_{\text{int}} = E_{\text{complex}} - E_{\text{solvated HCHO donor C=O}} - E_{\text{solvated HCHO acceptor C=O}}$$

Thus, for example, for the complex [HCHO $\cdots$ HCHO(HF)], the n $\rightarrow$  $\pi^*$  interaction energy is  $\Delta E_{\text{int}} = E_{\text{complex}} - E_{\text{HCHO}} - E_{\text{HCHO(HF)}}$ ; and for the complex [HCHO(HF) $\cdots$ HCHO(HFHF)], the n $\rightarrow$  $\pi^*$  interaction energy is  $\Delta E_{\text{int}} = E_{\text{complex}} - E_{\text{HCHO(HF)}} - E_{\text{HCHO(HFHF)}}$ .

**Table S3.** Comparison of different methods to calculate pyramidalization of the electron-acceptor carbonyl.<sup>a</sup>

| interaction             | groups on C=O    |                                   | pyramidalization, acceptor C=O |                  |              |                   |               |       |       |
|-------------------------|------------------|-----------------------------------|--------------------------------|------------------|--------------|-------------------|---------------|-------|-------|
|                         | donor            | acceptor                          | $\Delta$ , °                   | $d_{\Delta}$ , Å | $\theta$ , ° | $d'_{\Delta}$ , Å | $d_{C=O}$ , Å |       |       |
| HCHO·HCHO               | –                | –                                 | 0.6                            | 0.006            | 0.9          | 0.019             | 1.217         |       |       |
| HCHO·HCHO               | H <sub>2</sub> O | –                                 | 0.5                            | 0.004            | 0.6          | 0.013             | 1.217         |       |       |
| HCHO·HCHO               | –                | H <sub>2</sub> O                  | 0.7                            | 0.008            | 1.1          | 0.024             | 1.220         |       |       |
| HCHO·HCHO               | –                | H <sub>2</sub> O H <sub>2</sub> O | 1.0                            | 0.009            | 1.4          | 0.029             | 1.223         |       |       |
| HCHO·HCHO               | H <sub>2</sub> O | H <sub>2</sub> O                  | 0.3                            | 0.003            | 0.5          | 0.010             | 1.221         |       |       |
| HCHO·HCHO               | H <sub>2</sub> O | H <sub>2</sub> O H <sub>2</sub> O | 0.4                            | 0.005            | 0.7          | 0.014             | 1.222         |       |       |
| HCHO·HCHO               | HF               | –                                 | 0.4                            | 0.004            | 0.6          | 0.012             | 1.217         |       |       |
| HCHO·HCHO               | –                | HF                                | 1.1                            | 0.010            | 1.5          | 0.033             | 1.224         |       |       |
| HCHO·HCHO               | –                | HF HF                             | 1.6                            | 0.016            | 2.4          | 0.052             | 1.228         |       |       |
| HCHO·HCHO               | HF               | HF                                | 0.5                            | 0.005            | 0.7          | 0.015             | 1.222         |       |       |
| HCHO·HCHO               | HF               | HF HF                             | 0.7                            | 0.008            | 1.1          | 0.024             | 1.228         |       |       |
| HCHO·HCHO               | –                | urea                              | 0.8                            | 0.009            | 1.3          | 0.028             | 1.220         |       |       |
| HCHO·HCHO               | –                | thiourea                          | 0.9                            | 0.009            | 1.3          | 0.028             | 1.220         |       |       |
| HCHO·HCHO               | –                | guanidinium                       | 0.9                            | 0.009            | 1.4          | 0.029             | 1.222         |       |       |
| HCHO·HCHO               | –                | Li <sup>+</sup>                   | 0.9                            | 0.009            | 1.3          | 0.028             | 1.221         |       |       |
| HCHO·HCHO               | –                | Na <sup>+</sup>                   | 0.7                            | 0.007            | 1.1          | 0.023             | 1.222         |       |       |
| HCHO·HCHO               | –                | K <sup>+</sup>                    | 0.6                            | 0.005            | 0.8          | 0.017             | 1.218         |       |       |
| Ac-Pro-NMe <sub>2</sub> | <i>exo</i>       | PPII                              | –                              | –                | 2.1          | 0.022             | 2.7           | 0.058 | 1.227 |
| Ac-Pro-NMe <sub>2</sub> | <i>endo</i>      | PPII                              | –                              | –                | 1.4          | 0.015             | 1.9           | 0.040 | 1.227 |
| Ac-Pro-NMe <sub>2</sub> | <i>exo</i>       | $\alpha$                          | –                              | –                | –1.7         | 0.019             | 2.4           | 0.052 | 1.230 |
| Ac-Pro-NMe <sub>2</sub> | <i>endo</i>      | $\alpha$                          | –                              | –                | –0.5         | 0.006             | 0.7           | 0.016 | 1.232 |
| Ac-Ala-NMe <sub>2</sub> |                  | PPII                              | –                              | –                | 2.0          | 0.021             | 2.6           | 0.056 | 1.227 |
| Ac-Ala-NMe <sub>2</sub> |                  | PPII                              | –                              | HF HF            | 2.4          | 0.027             | 3.4           | 0.074 | 1.261 |
| Ac-Ala-NMe <sub>2</sub> |                  | $\alpha$                          | –                              | –                | –0.7         | 0.008             | 1.0           | 0.021 | 1.229 |
| Ac-Ala-NMe <sub>2</sub> |                  | $\alpha$                          | –                              | HF HF            | –0.8         | 0.009             | 1.1           | 0.025 | 1.263 |

<sup>a</sup>  $\Delta$  = pyramidalization of the carbonyl, as defined by the torsion angle (°) between the *pro-R* H, the *pro-S* H, the carbonyl O, and the carbonyl C for formaldehyde complexes (shown schematically in Figure 1c), and as defined by the torsion angle between the C $\alpha$ , the N of the dimethyl amide, the carbonyl O, and the carbonyl C for peptides. Three other methods to quantify pyramidalization were also examined: (1)  $d_{\Delta}$ , the orthogonal distance between the C of the carbonyl and the plane defined by other three atoms attached to the carbonyl C; (2)  $\theta$ , the angle between the bond of the carbonyl and the plane defined by the carbonyl C and the non-O atoms attached to the carbonyl; and (3)  $d'_{\Delta}$ , the orthogonal distance between the O of the carbonyl and the plane defined by the carbonyl C and the non-O atoms attached to the carbonyl. The torsion angle-based determination of the extent of pyramidalization ( $\Delta$ ) was used as the primary method, as it can be rapidly conducted in popular molecular graphics programs (e.g. GaussView or Pymol). The other methods involved defining the atoms of the plane (here, conducted in Mercury) and then calculating the distance of those atoms to the plane.  $\theta = \sin^{-1}(d'_{\Delta} / d_{C=O})$ , where  $d_{C=O}$  = the length of the C=O bond (Å). In contrast to other approaches, the torsion angle-based measurement ( $\Delta$ ) has the specific advantage of indicating the stereochemistry of the puckering of the carbonyl C: for the formaldehyde complexes, and for peptides in a PPII conformation, with the torsion angles as defined, an  $n \rightarrow \pi^*$  interaction would be expected to have a positive value of  $\Delta$ , while for peptides in an  $\alpha$  conformation, a negative value of  $\Delta$  is expected. In all cases herein, the sign of  $\Delta$  matched the expectations for the relevant  $n \rightarrow \pi^*$  interaction.

**Table S4.** Energies of Ac-Pro-NMe<sub>2</sub> as a function of ring pucker, main chain conformation, and explicit solvation. Structures of all molecules were generated via geometry optimization using the M06-2X method with the jun-cc-pVTZ basis set in implicit water (IEFPCM). Energies and dipole moments ( $\mu$ , Debye (D)) were determined using the MP2 method with the aug-cc-pVTZ basis set in implicit water.

|                         | <i>pucker</i> | <i>2°</i>                   | solvation                   |                             | $\mu$ , D     | <i>E</i>      | <i>E<sub>rel</sub></i> <sup>a</sup> |              |
|-------------------------|---------------|-----------------------------|-----------------------------|-----------------------------|---------------|---------------|-------------------------------------|--------------|
|                         |               |                             | donor                       | acceptor                    |               | hartrees      | kcal mol <sup>-1</sup>              |              |
| Ac-Pro-NMe <sub>2</sub> | <i>exo</i>    | <i>PPII</i>                 | –                           | –                           | 6.8           | -611.4427653  | 0.48                                |              |
|                         |               |                             | –                           | HF <i>cis</i>               | 9.2           | -711.8111236  | 0.34                                |              |
|                         |               |                             | –                           | HF <i>trans</i>             | 10.0          | -711.8082455  | 0.37                                |              |
|                         |               |                             | –                           | HF HF                       | 11.6          | -812.1726305  | 0.15                                |              |
|                         |               |                             | HF                          | –                           | 10.9          | -711.8103764  | 0.55                                |              |
|                         |               |                             | HF                          | HF HF                       | 14.3          | -912.5390250  | 0.24                                |              |
|                         |               |                             | –                           | urea                        | 12.8          | -836.3853222  | -0.66                               |              |
|                         |               |                             | –                           | thiourea                    | 14.6          | -1158.9660345 | -1.35                               |              |
|                         |               |                             | –                           | guanidinium                 | 9.1           | -816.9609505  | -1.13                               |              |
|                         |               |                             | –                           | H <sub>2</sub> O <i>cis</i> | 7.1           | -687.7906696  | 0.57                                |              |
|                         |               |                             | –                           | H <sub>2</sub> O HF         | 9.7           | -788.1543161  | 0.47                                |              |
|                         |               |                             | HFHF                        | HF HF                       | 14.5          | -1012.8995328 | 0.68                                |              |
|                         |               |                             | HFHF                        | –                           | 12.0          | -812.1722480  | 0.92                                |              |
|                         |               |                             | –                           | 5 H <sub>2</sub> O          | 11.5          | -993.1819748  | -0.34                               |              |
|                         |               |                             | <i>endo</i>                 | <i>PPII</i>                 | –             | –             | 6.8                                 | -611.4435351 |
|                         | –             | HF <i>cis</i>               |                             |                             | 9.3           | -711.8116707  | 0.00                                |              |
|                         | –             | HF <i>trans</i>             |                             |                             | 9.8           | -711.8088360  | 0.00                                |              |
|                         | –             | HF HF                       |                             |                             | 11.6          | -812.1728646  | 0.00                                |              |
|                         | HF            | –                           |                             |                             | 11.2          | -711.8112481  | 0.00                                |              |
|                         | HF            | HF HF                       |                             |                             | 14.4          | -912.5394072  | 0.00                                |              |
|                         | –             | urea                        |                             |                             | 12.8          | -836.3842636  | 0.00                                |              |
|                         | –             | thiourea                    |                             |                             | 12.4          | -1158.9638841 | 0.00                                |              |
|                         | –             | guanidinium                 |                             |                             | 11.7          | -816.9591571  | 0.00                                |              |
|                         | –             | H <sub>2</sub> O <i>cis</i> |                             |                             | 7.3           | -687.7915841  | 0.00                                |              |
|                         | –             | H <sub>2</sub> O HF         |                             |                             | 9.9           | -788.1550576  | 0.00                                |              |
|                         | HFHF          | HF HF                       |                             |                             | 15.9          | -1012.9006178 | 0.00                                |              |
|                         | HFHF          | –                           |                             |                             | 12.2          | -812.1737124  | 0.00                                |              |
|                         | –             | 5 H <sub>2</sub> O          |                             |                             | 14.3          | -993.1812713  | 0.00                                |              |
|                         | <i>exo</i>    | $\alpha$                    |                             |                             | –             | –             | 10.4                                | -611.4409817 |
|                         |               |                             | –                           | HF <i>cis</i>               | 13.2          | -711.8086470  | 1.90                                |              |
|                         |               |                             | –                           | HF <i>trans</i>             | 14.0          | -711.8068750  | 1.23                                |              |
|                         |               |                             | –                           | HF HF                       | 15.8          | -812.1700338  | 1.78                                |              |
|                         |               |                             | HF                          | –                           | 13.1          | -711.8082548  | 1.88                                |              |
| HF                      |               |                             | HF HF                       | 17.7                        | -912.5358943  | 2.20          |                                     |              |
| –                       |               |                             | urea                        | 17.4                        | -836.3787901  | 3.43          |                                     |              |
| –                       |               |                             | thiourea                    | 19.9                        | -1158.9584948 | 3.38          |                                     |              |
| –                       |               |                             | guanidinium                 | 9.6                         | -816.9550503  | 2.58          |                                     |              |
| –                       |               |                             | H <sub>2</sub> O <i>cis</i> | 10.9                        | -687.7872968  | 2.69          |                                     |              |
| –                       |               |                             | H <sub>2</sub> O HF         | 13.1                        | -788.1509384  | 2.58          |                                     |              |
| HFHF                    |               |                             | HF HF                       | 19.7                        | -1012.8946023 | 3.77          |                                     |              |
| HFHF                    |               |                             | –                           | 15.4                        | -812.1680689  | 3.54          |                                     |              |
| <i>endo</i>             |               |                             | $\alpha$                    | –                           | –             | 9.8           | -611.4381338                        | 3.39         |
|                         |               |                             |                             | –                           | HF <i>cis</i> | 12.7          | -711.8056418                        | 3.78         |
|                         | –             | HF <i>trans</i>             |                             | 13.0                        | -711.8037168  | 3.21          |                                     |              |
|                         | –             | HF HF                       |                             | 14.8                        | -812.1668643  | 3.77          |                                     |              |
|                         | HF            | –                           |                             | 12.3                        | -711.8050265  | 3.90          |                                     |              |
|                         | HF            | HF HF                       |                             | 15.7                        | -912.5327228  | 4.19          |                                     |              |
|                         | –             | urea                        |                             | 16.5                        | -836.3758769  | 5.26          |                                     |              |
|                         | –             | thiourea                    |                             | 18.8                        | -1158.9555368 | 5.24          |                                     |              |
|                         | –             | guanidinium                 |                             | 12.7                        | -816.9519974  | 4.49          |                                     |              |
|                         | –             | H <sub>2</sub> O <i>cis</i> |                             | 9.3                         | -687.7843326  | 4.55          |                                     |              |
|                         | –             | H <sub>2</sub> O HF         |                             | 12.1                        | -788.1479774  | 4.44          |                                     |              |
|                         | HFHF          | HF HF                       |                             | 17.7                        | -1012.8926256 | 5.02          |                                     |              |
|                         | HFHF          | –                           |                             | 14.2                        | -812.1653645  | 5.24          |                                     |              |

<sup>a</sup> Relative energies ( $E_{rel}$ ) are referenced to the energy of the structure with an *endo* ring pucker and PPII conformation with the given solvation pattern (italics). All structures have *trans* Ac-Pro amide bonds.

**Table S5.** Energies of Ac-Ala-NMe<sub>2</sub> as a function of main chain conformation and explicit solvation. Structures of all molecules were generated via geometry optimization using the M06-2X method with the jun-cc-pVTZ basis set in implicit water (IEFPCM). Energies and dipole moments ( $\mu$ , Debye (D)) were determined using the MP2 method with the aug-cc-pVTZ basis set in implicit water.

|                         | 2°      | C=O solvation |                    | $\mu$ , D | E,<br>hartrees | $E_{\text{rel}}^a$ , kcal mol <sup>-1</sup> |                   |             |
|-------------------------|---------|---------------|--------------------|-----------|----------------|---------------------------------------------|-------------------|-------------|
|                         |         | donor         | acceptor           |           |                | to $\alpha$                                 | to PPII           | to $\beta$  |
| Ac-Ala-NMe <sub>2</sub> | PPII    | -             | -                  | 5.1       | -534.1925525   | -1.69                                       | <i>0.00</i>       | 0.91        |
|                         |         | -             | HF HF              | 9.5       | -734.9211799   | -1.69                                       | <i>0.00</i>       | -2.64       |
|                         |         | HF            | HF HF              | 11.8      | -835.2865358   | -1.76                                       | <i>0.00</i>       | -2.44       |
|                         |         | HFHF          | HF HF              | 13.6      | -935.6465591   | -3.25                                       | <i>0.00</i>       | -1.71       |
|                         |         | HFHF          | -                  | 10.8      | -734.9202784   | -3.05                                       | <i>0.00</i>       | 1.53        |
|                         |         | HFHF          | HF                 | 13.3      | -835.2846949   | -2.92                                       | <i>0.00</i>       | 0.57        |
|                         |         | -             | urea               | 11.6      | -759.1334006   | -3.52                                       | <i>0.00</i>       | -1.85       |
|                         |         | -             | 4 H <sub>2</sub> O | 5.3       | -839.5804997   | -6.41 <sup>b</sup>                          | <i>0.00</i>       | -2.89       |
|                         |         | $\alpha$      | -                  | -         | 10.1           | -534.1898574                                | <i>0.00</i>       | 1.69        |
|                         | -       |               | HF HF              | 15.6      | -734.9184914   | <i>0.00</i>                                 | 1.69              | -0.95       |
|                         | HF      |               | HF HF              | 17.1      | -835.2837241   | <i>0.00</i>                                 | 1.76              | -0.67       |
|                         | HFHF    |               | HF HF              | 18.9      | -935.6413852   | <i>0.00</i>                                 | 3.25              | 1.53        |
|                         | HFHF    |               | -                  | 15.0      | -734.9154225   | <i>0.00</i>                                 | 3.05              | 4.58        |
|                         | HFHF    |               | HF                 | 17.6      | -835.2800353   | <i>0.00</i>                                 | 2.92              | 3.49        |
|                         | -       |               | urea               | 14.0      | -759.1277834   | <i>0.00</i>                                 | 3.52              | 1.68        |
|                         | -       |               | 4 H <sub>2</sub> O | 11.3      | -839.5702832   | <i>0.00</i>                                 | 6.41 <sup>b</sup> | 3.53        |
|                         | $\beta$ |               | -                  | -         | 4.1            | -534.1939966                                | -2.60             | -0.91       |
|                         |         | -             | HF HF <sup>c</sup> | 7.6       | -734.9169770   | 0.95                                        | 2.64              | <i>0.00</i> |
|                         |         | HF            | HF HF <sup>c</sup> | 9.0       | -835.2826492   | 0.67                                        | 2.44              | <i>0.00</i> |
|                         |         | HFHF          | HF HF              | 6.8       | -935.6438262   | -1.53                                       | 1.71              | <i>0.00</i> |
|                         |         | HFHF          | -                  | 8.1       | -734.9227196   | -4.58                                       | -1.53             | <i>0.00</i> |
|                         |         | HFHF          | HF                 | 5.2       | -835.2855989   | -3.49                                       | -0.57             | <i>0.00</i> |
|                         |         | -             | urea               | 6.4       | -759.1304564   | -1.68                                       | 1.85              | <i>0.00</i> |
|                         |         | -             | 4 H <sub>2</sub> O | 7.5       | -839.5759012   | -3.53 <sup>b</sup>                          | 2.89              | <i>0.00</i> |

<sup>a</sup> Relative energies ( $E_{\text{rel}}$ ) are referenced (italics) to the energy of the structure with the conformation indicated in column header and the given solvation pattern. All structures have *trans* Ac-Ala amide bonds.

<sup>b</sup> The 4-H<sub>2</sub>O-cluster structure with an  $\alpha$ -helix conformation contains one less H<sub>2</sub>O-H<sub>2</sub>O hydrogen bond than the H<sub>2</sub>O-cluster structures with a PPII conformation or with a  $\beta$  conformation. A H<sub>2</sub>O-H<sub>2</sub>O hydrogen bond in water is favorable by 4.0 kcal mol<sup>-1</sup> at this level of theory (Table S2). Thus, these numbers should properly be scaled to be 4.0 kcal mol<sup>-1</sup> more favorable for the  $\alpha$ -helix conformation than is indicated by the numbers in this table, in order to account for the differences in the number of H<sub>2</sub>O-H<sub>2</sub>O hydrogen bonds in the structures. Thus, the corrected values for the 4-H<sub>2</sub>O clusters are that the PPII conformation is more stable than the  $\alpha$ -helix conformation by 2.4 kcal mol<sup>-1</sup> (instead of 6.4 kcal mol<sup>-1</sup>), and the  $\alpha$ -helix conformation is more stable than the  $\beta$  conformation by 0.5 kcal mol<sup>-1</sup> (instead of the  $\beta$  conformation being more stable than the  $\alpha$ -helix conformation by 3.5 kcal mol<sup>-1</sup>).

<sup>c</sup> Attempts to achieve geometry optimization of this solvation pattern in a  $\beta$  conformation led to a change in conformation to PPII. In order to understand the energetics, these structures were

examined via geometry optimization with  $\phi$  fixed at  $-160^\circ$ , as is present in the structure with implicit solvation. Torsion angle scans from  $\phi = -140^\circ$  to  $\phi = -180^\circ$  confirmed that there was no energy minimum in this region for these structures. These structures, while not local energy minima, nonetheless exhibited zero imaginary (negative) frequencies.

**Table S6.** Energies of Ac-Pro<sub>2</sub>-NMe<sub>2</sub> in a PPII conformation, as a function of ring pucker and explicit solvation. Structures of all molecules were generated via geometry optimization using the M06-2X method with the 6-311++G(2d,2p) basis set in implicit water. Energies were determined using the MP2 method with the 6-311++G(3d,3p) basis set in implicit water (IEFPCM).

| name | explicit C=O solvation |      |      | $E$ , hartrees    |                 |                 |                  | $E_{\text{rel}}^a$ , kcal mol <sup>-1</sup> |                 |                 |                   |
|------|------------------------|------|------|-------------------|-----------------|-----------------|------------------|---------------------------------------------|-----------------|-----------------|-------------------|
|      | Ac                     | P1   | P2   | P1-P2 ring pucker |                 |                 |                  | P1-P2 ring pucker                           |                 |                 |                   |
|      |                        |      |      | <i>exo-exo</i>    | <i>exo-endo</i> | <i>endo-exo</i> | <i>endo-endo</i> | <i>exo-exo</i>                              | <i>exo-endo</i> | <i>endo-exo</i> | <i>endo-endo</i>  |
| 0HF  | -                      | -    | -    | -935.2209428      | -935.2221080    | -935.2219268    | -935.2232140     | +1.43                                       | +0.69           | +0.81           | 0.00 <sup>a</sup> |
| 2HF  | -                      | -    | HFHF | -1135.8859701     | -1135.8849488   | -1135.8872452   | -1135.8854639    | -0.32                                       | +0.32           | -1.12           | 0.00 <sup>a</sup> |
| 3HF  | -                      | HF   | HFHF | -1236.2209899     | -1236.2197641   | -1236.2220193   | -1236.2199704    | -0.64                                       | +0.13           | -1.29           | 0.00 <sup>a</sup> |
| 4HF  | HF                     | HF   | HFHF | -1336.5546556     | -1336.5533056   | -1336.5557615   | -1336.5536817    | -0.61                                       | +0.24           | -1.31           | 0.00 <sup>a</sup> |
| 5HF  | HF                     | HFHF | HFHF | -1436.8826624     | -1436.8821577   | -1436.8824899   | -1436.8820137    | -0.41                                       | -0.09           | -0.30           | 0.00 <sup>a</sup> |
| 5aHF | HFHF                   | HF   | HFHF | -1436.8831392     | -1436.8810929   | -1436.8857429   | -1436.8831047    | -0.01                                       | +1.26           | -1.66           | 0.00 <sup>a</sup> |
| 5bHF | HFHF                   | HFHF | HF   | -1436.8817699     | -1436.8815572   | -1436.8832169   | -1436.8830800    | +0.82                                       | +0.96           | -0.09           | 0.00 <sup>a</sup> |
| 6HF  | HFHF                   | HFHF | HFHF | -1537.2107822     | -1537.2096616   | -1537.2123801   | -1537.2108376    | +0.03                                       | +0.68           | -0.97           | 0.00 <sup>a</sup> |

<sup>a</sup> Relative energies ( $E_{\text{rel}}$ ) for each solvation pattern are referenced to the peptide with an *endo* ring pucker on both prolines in that solvation pattern. All structures have *trans* Ac-Pro and Pro-Pro amide bonds.



## Coordinates of geometry-optimized structures

### Coordinates of small molecule structures

#### HF

optimized MP2/augccpVTZ/H2O

```
0 1
F      -0.00000000  0.00000000  0.09256827
H      -0.00000000 -0.00000000 -0.83311447
```

```
1 2 1.0
2
```

#### H2O

optimized MP2/augccpVTZ/H2O

```
0 1
O      -0.00000015  0.11883742  0.00000000
H      0.75740388 -0.47534867  0.00000000
H      -0.75740265 -0.47535066 -0.00000000
```

```
1 2 1.0 3 1.0
2
3
```

#### HCHO

optimized MP2/augccpVTZ/H2O

```
0 1
C      0.00000696  0.53694166  0.00000000
H      0.93505350  1.11026527  0.00000000
H      -0.93515092  1.11009971  0.00000000
O      0.00000696 -0.68025187  0.00000000
```

```
1 2 1.0 3 1.0 4 2.0
2
3
4
```

#### urea

optimized MP2/augccpVTZ/H2O

```
0 1
C      0.00000094  0.13129430 -0.00094879
O      0.00000139  1.36533844  0.01252318
N      1.15571370 -0.59815379 -0.05745486
H      1.99580168 -0.09403886  0.16901599
H      1.14529395 -1.57413117  0.18592710
N      -1.15571756 -0.59815467 -0.05746824
H      -1.99579238 -0.09403059  0.16903575
H      -1.14529302 -1.57411342  0.18599017
```

```
1 2 2.0 3 1.0 6 1.0
2
3 4 1.0 5 1.0
```

4  
5  
6 7 1.0 8 1.0  
7  
8

### thiourea

optimized MP2/augccpVTZ/H2O

0 1  
C -0.33408751 -0.00000086 -0.00014493  
N -1.03778208 -1.14092044 -0.00005051  
H -0.54001930 -2.01270934 0.00034508  
H -2.04426919 -1.15350455 0.00018505  
N -1.03777410 1.14092229 -0.00003097  
H -0.54000990 2.01271092 0.00016474  
H -2.04426715 1.15352212 0.00036444  
S 1.35637399 -0.00000168 0.00002379

1 2 1.0 5 1.0 8 2.0  
2 3 1.0 4 1.0  
3  
4  
5 6 1.0 7 1.0  
6  
7  
8

The above structure had one negative/imaginary frequency, even after multiple attempts at geometry optimization.

### guanidinium

MP2/augccpVTZ/H2O optimized

1 1  
C 0.00004471 0.00010977 0.00009161  
N -1.05771229 0.80357690 -0.00053959  
H -1.99042560 0.42997393 0.00724719  
H -0.94826173 1.80232871 -0.00275339  
N 1.22489265 0.51403868 0.00123623  
H 2.03488424 -0.08056213 -0.00774860  
H 1.36812965 1.50852639 0.00287281  
N -0.16716597 -1.31769517 -0.00463409  
H 0.62226417 -1.93855679 0.01910394  
H -1.08695973 -1.72181158 0.00829056

1 2 1.5 5 1.5 8 1.5  
2 3 1.0 4 1.0  
3  
4  
5 6 1.0 7 1.0  
6  
7  
8 9 1.0 10 1.0  
9  
10

The above structure had one negative/imaginary frequency.

## 2H2O-lowD

optimized MP2/augccpVTZ/H2O low dipole moment water dimer

```
0 1 0 1 0 1
O(Fragment=1) -1.48837400  0.01691800 -0.11786700
H(Fragment=1) -0.51993400  0.00333400 -0.02321200
H(Fragment=1) -1.81612400 -0.11388600  0.77699100
O(Fragment=2)  1.33332900 -0.01108100  0.09417500
H(Fragment=2)  1.78797200 -0.72355500 -0.36873900
H(Fragment=2)  1.78844300  0.78741200 -0.19549600
```

```
1 2 1.0 3 1.0
2
3
4 5 1.0 6 1.0
5
6
```

## 2H2O

optimized MP2/augccpVTZ/H2O high dipole moment water dimer

```
0 1 0 1 0 1
O(Fragment=1)  1.48972316  0.00287331 -0.09868670
H(Fragment=1)  0.51962920  0.00015345 -0.01900220
H(Fragment=1)  1.80270152 -0.02312689  0.81065475
O(Fragment=2) -1.33575070  0.00169396 -0.07909368
H(Fragment=2) -1.77795235 -0.76701856  0.29795326
H(Fragment=2) -1.77615805  0.75345387  0.33263726
```

```
1 2 1.0 3 1.0
2
3
4 5 1.0 6 1.0
5
6
```

## HCHO-HF

optimized MP2/augccpVTZ/H2O

```
0 1
C -1.47367801  0.32540867  0.00000033
H -1.20088174  1.38434613 -0.00000227
H -2.53469381  0.06626283  0.00000212
O -0.62141784 -0.55098683 -0.00000180
F  1.84709457  0.12520750 -0.00000182
H  0.92513522 -0.12203376  0.00002895
```

```
1 2 1.0 3 1.0 4 2.0
2
3
4
5 6 1.0
6
```

## HCHO-HFHF

optimized MP2/augccpVTZ/H2O

```
0 1
C      0.00011278  1.63112435  0.00111470
H      0.93965208  2.18479718  0.00294257
H     -0.93931409  2.18498679  0.00307600
O     -0.00000788  0.40457843 -0.00326724
F      2.26188042 -0.91761984  0.00088439
H      1.44694167 -0.43856201 -0.00121952
F     -2.26197729 -0.91750425  0.00087710
H     -1.44702148 -0.43847880 -0.00120274
```

```
1 2 1.0 3 1.0 4 2.0
2
3
4
5 6 1.0
6
7 8 1.0
8
```

## HCHO-HFHFHF

MP2/augccpVTZ/H2O optimized

```
0 1
C      0.19273109 -1.25461890  1.39258883
H      1.15608350 -1.38264566  1.88704291
H     -0.70424195 -1.64888255  1.87105939
O      0.11872054 -0.67494037  0.31152479
F      2.36558402 -0.07730106 -0.96591405
H      1.56774293 -0.28872614 -0.51181614
F     -2.18485254 -0.73551920 -1.00084062
H     -1.36748273 -0.71113811 -0.53295310
F     -0.45868454  2.51772372  0.41232107
H     -0.25667510  1.61449769  0.42883802
```

```
1 2 1.0 3 1.0 4 2.0
2
3
4
5 6 1.0
6
7 8 1.0
8
9 10 1.0
10
```

This structure had one negative/imaginary frequency. Energy analysis of this structure (Table S2) indicates no additional hydrogen bonding energy (beyond the structure with 2 HF bound), despite one additional hydrogen bond donor.

## HCHO-4HF

MP2/augccpVTZ/H2O optimized model 60 (lowest E/error)

```
0 1
C(Iso=12)   -0.45230033  0.01451030  1.99750325
H(Iso=1)    -0.50735105  0.95713446  2.54285696
H(Iso=1)    -0.49673708  -0.92251671  2.55331618
O(Iso=16)   -0.34237420  0.00839879  0.77354336
F(Iso=19)   0.10847765  2.29148964  -0.49098568
H(Iso=1)    -0.05954286  1.48250273  -0.03766607
F(Iso=19)   0.12956004  -2.28307056  -0.46612153
H(Iso=1)    -0.04676525  -1.47123633  -0.02107416
F(Iso=19)   -3.16879037  -0.02541397  -1.00054911
H(Iso=1)    -2.42569073  -0.00090643  -0.44939806
F(Iso=19)   3.61807133  -0.00860069  -0.55793576
H(Iso=1)    2.80301472  0.03113047  -0.12107262
```

```
1 2 1.0 3 1.0 4 2.0
2
3
4
5 6 1.0
6
7 8 1.0
8
9 10 1.0
10
11 12 1.0
12
```

This structure did not optimize to a stable energy minimum (no convergence). Energy analysis of this structure (Table S2) indicates no additional hydrogen bonding energy (beyond the structures with 2 HF bound or with 3 HF bound), despite one or two additional hydrogen bond donors.

## HCHO-H2O

optimized MP2/augccpVTZ/H2O

```
0 1
C           -1.56417953  0.35362370  -0.00130808
H           -1.22649064  1.39567948  -0.02126775
H           -2.64372097  0.17179156  0.00335298
O           -0.76922185  -0.57135218  0.01507387
O           2.00432571  0.09849364  -0.10942008
H           2.30790001  0.23327538  0.79372860
H           1.06655789  -0.13962029  -0.01319570
```

```
1 2 1.0 3 1.0 4 2.0
2
3
4
5 6 1.0 7 1.0
6
7
```

## HCHO-H2OH2O

optimized MP2/augccpVTZ/H2O

```
0 1
C      0.00000266  1.66801193  0.00893169
H      0.93746362  2.23165873  0.01214535
H     -0.93744865  2.23167731  0.01215361
O      0.00000117  0.44605887  0.00186548
O      2.52980829 -0.93350062 -0.10434307
H      2.81916007 -1.07262138  0.80290850
H      1.67666961 -0.47934133 -0.01459585
O     -2.52983146 -0.93345984 -0.10433826
H     -2.81901190 -1.07289383  0.80291977
H     -1.67667271 -0.47933835 -0.01459477
```

```
1 2 1.0 3 1.0 4 2.0
2
3
4
5 6 1.0 7 1.0
6
7
8 9 1.0 10 1.0
9
10
```

## HCHO-urea

optimized MP2/augccpVTZ/H2O

```
0 1
C      3.23231306 -0.00101273 -0.02859202
H      3.80118232  0.93443465 -0.00804218
H      3.79661440 -0.93917702 -0.00583361
O      2.01398375  0.00190707 -0.07740820
C     -1.47968996 -0.00025363  0.01226061
O     -2.70550613 -0.00112497 -0.14925449
N     -0.75692462 -1.15203228  0.14994368
H     -1.22895734 -1.99601226 -0.12443817
H      0.24503908 -1.12196602  0.03699207
N     -0.75862591  1.15261773  0.15007505
H     -1.23192200  1.99586180 -0.12440514
H      0.24333764  1.12410207  0.03688594
```

```
1 2 1.0 3 1.0 4 2.0
2
3
4
5 6 2.0 7 1.0 10 1.0
6
7 8 1.0 9 1.0
8
9
10 11 1.0 12 1.0
11
12
```

### HCHO-thiourea

optimized MP2/augccpVTZ/H2O

```
0 1
C      -3.71495057 -0.00015304  0.03194890
H      -4.27985233 -0.93720434  0.06363975
H      -4.28048806  0.93661809  0.06039240
O      -2.49692033  0.00014967 -0.03373632
C       0.93619726  0.00003763 -0.00476783
N       0.23029176  1.13918585 -0.01318397
H       0.72767019  2.01105421 -0.00695645
H      -0.78033135  1.13067155 -0.02428398
N       0.23004593 -1.13894949 -0.01352129
H       0.72722768 -2.01092977 -0.00726449
H      -0.78058536 -1.13017646 -0.02420205
S       2.63074237 -0.00013705  0.01452599
```

```
1 2 1.0 3 1.0 4 2.0
2
3
4
5 6 1.0 9 1.0 12 2.0
6 7 1.0 8 1.0
7
8
9 10 1.0 11 1.0
10
11
12
```

### HCHO-guanidinium

optimized MP2/augccpVTZ/H2O

```
1 1
C      -3.23011900  0.00005800  0.08240000
H      -3.78998500  0.93735900  0.15278900
H      -3.79021300 -0.93710000  0.15289000
O      -2.01930100 -0.00009800 -0.06985300
C       1.30936500  0.00000400 -0.00770200
N       0.64128900 -1.14725000 -0.04980900
H       1.12638200 -2.02637300 -0.02317100
H      -0.36791200 -1.13462900 -0.09529100
N       0.64122100  1.14722000 -0.04981900
H       1.12625800  2.02637000 -0.02309000
H      -0.36798100  1.13453300 -0.09526300
N       2.63897000  0.00004500  0.05877700
H       3.14598700  0.86113800  0.16374700
H       3.14604100 -0.86098800  0.16398100
```

```
1 2 1.0 3 1.0 4 2.0
2
3
4
5 6 1.5 9 1.5 12 1.5
6 7 1.0 8 1.0
7
8
9 10 1.0 11 1.0
10
11
12 13 1.0 14 1.0
13
14
```

### HCHO-Hacceptor

MP2/aug-cc-pVTZ/H2O optimized

```
1 1
C      -0.62402592  0.03243198  0.00001290
H      -1.05773333  1.02479938 -0.00002249
H      -1.21931066 -0.86990844 -0.00003613
O       0.61272359 -0.13221203 -0.00000036
H       1.11941073  0.70821337 -0.00001592
```

```
1 2 1.0 3 1.0 4 2.0
2
3
4
5
```

### HCHO-Liacceptor

MP2/augccpVTZ/H2O optimized

```
1 1
C       0.84221342  0.22383942 -0.00000014
H       0.80950381  1.31752573  0.00001866
H       1.82442969 -0.25601924  0.00002252
O      -0.18067232 -0.44300733 -0.00001414
Li     -2.08061180  0.37983855  0.00002426
```

```
1 2 1.0 3 1.0 4 2.0
2
3
4
5
```

### HCHO-Naacceptor

MP2/augccpVTZ/H2O optimized

```
1 1
C       1.73892813  0.19715007 -0.00006349
H       1.81754573  1.28933530 -0.00009304
H       2.67121370 -0.37686952  0.00012466
O       0.65530881 -0.36341848 -0.00000663
Na     -1.83316352  0.07381651  0.00003658
```

```
1 2 1.0 3 1.0 4 2.0
2
3
4
5
```



## HCHO-Kacceptor

MP2/augccpVTZ-6311pp3d3p/H2O optimized

```
1 1
C      -2.28332748  0.35402501  0.00001266
H      -1.94749219  1.39886767  0.00001168
H      -3.36649533  0.17500982 -0.00001206
O      -1.48906298 -0.56881355  0.00005208
K      1.62770822  0.04486741 -0.00002591
```

```
1 2 1.0 3 1.0 4 2.0
2
3
4
5
```

## 2HCHO

MP2/augccpVTZ/H2O optimized

```
0 1 0 1 0 1
C(Fragment=1) -2.12014561  0.25537301 -0.00005867
H(Fragment=1) -1.85875180  1.32139995  0.00031974
H(Fragment=1) -3.18744416  0.00444961 -0.00046128
O(Fragment=1) -1.26269203 -0.60915732 -0.00003270
C(Fragment=2)  1.34949362  0.49246868  0.00011593
H(Fragment=2)  0.93606798  0.89139635 -0.93375142
H(Fragment=2)  0.93619903  0.89117964  0.93413528
O(Fragment=2)  2.23742214 -0.34027714 -0.00004053
```

```
1 2 1.0 3 1.0 4 2.0
2
3
4
5 6 1.0 7 1.0 8 2.0
6
7
8
```

## 2HCHO-HFdonor

optimized MP2/aug-cc-pvtz/H2O v3

```
0 1 0 1 0 1
C(Fragment=1) -1.14217543  1.65342887 -0.01991710
H(Fragment=1) -0.47169554  2.51616150 -0.02596607
H(Fragment=1) -2.21993759  1.83671260 -0.02674095
O(Fragment=1) -0.68967256  0.51749408 -0.00574093
C(Fragment=2)  2.17936001  0.23703829  0.05761842
H(Fragment=2)  2.04545442  0.88589365 -0.81634033
H(Fragment=2)  1.97792576  0.68159525  1.03959420
O(Fragment=2)  2.54521191 -0.91817892 -0.05647646
F(Fragment=1) -2.29921240 -1.48041816  0.01075562
H(Fragment=1) -1.70625765 -0.73392368  0.00418372
```

```
1 2 1.0 3 1.0 4 2.0
2
3
4
5 6 1.0 7 1.0 8 2.0
6
7
8
9 10 1.0
10
```

## 2HCHO-HFacceptor

optimized MP2/augccpVTZ/H2O v2

0 1 0 1 0 1

|               |             |             |             |
|---------------|-------------|-------------|-------------|
| C(Fragment=1) | 2.84550646  | -0.39277695 | 0.20883440  |
| H(Fragment=1) | 2.94118574  | 0.28000740  | 1.07010765  |
| H(Fragment=1) | 3.71868109  | -1.00286894 | -0.04899496 |
| O(Fragment=1) | 1.81251472  | -0.45877022 | -0.43381198 |
| C(Fragment=2) | -0.24798130 | 1.07229794  | 0.32570789  |
| H(Fragment=2) | -0.11853036 | 0.48198493  | 1.23600465  |
| H(Fragment=2) | 0.47625207  | 1.86249976  | 0.12065717  |
| O(Fragment=2) | -1.19150341 | 0.88206602  | -0.42927153 |
| F(Fragment=2) | -2.81870482 | -0.97864249 | 0.15362220  |
| H(Fragment=2) | -2.20248660 | -0.27733313 | -0.06295999 |

1 2 1.0 3 1.0 4 2.0

2

3

4

5 6 1.0 7 1.0 8 2.0

6

7

8

9 10 1.0

10

## 2HCHO-HFdonor-HFacceptor

optimized MP2/augccpVTZ/H2O

0 1 0 1 0 1

|               |             |             |             |
|---------------|-------------|-------------|-------------|
| C(Fragment=1) | -2.74526397 | -0.56358614 | 0.42830833  |
| H(Fragment=1) | -3.03113981 | -1.58805699 | 0.67639403  |
| H(Fragment=1) | -3.51622112 | 0.21096295  | 0.45527595  |
| O(Fragment=1) | -1.58951602 | -0.29817587 | 0.12864488  |
| C(Fragment=2) | 0.78562010  | -1.65046569 | -0.15363773 |
| H(Fragment=2) | 0.71697883  | -1.66628660 | 0.93693764  |
| H(Fragment=2) | 0.19904848  | -2.38086298 | -0.71437279 |
| O(Fragment=2) | 1.50636840  | -0.85264045 | -0.73594106 |
| F(Fragment=2) | 2.79193781  | 0.83165872  | 0.67676845  |
| H(Fragment=2) | 2.30986956  | 0.19684503  | 0.14722926  |
| F(Fragment=1) | -0.91209134 | 2.11219975  | -0.46020033 |
| H(Fragment=1) | -1.17411003 | 1.22351392  | -0.24023126 |

1 2 1.0 3 1.0 4 2.0

2

3

4

5 6 1.0 7 1.0 8 2.0

6

7

8

9 10 1.0

10

11 12 1.0

12

## 2HCHO-HFHFacceptor

MP2/aug-cc-pVTZ/H2O optimized

0 1 0 1 0 1

|               |             |             |             |
|---------------|-------------|-------------|-------------|
| C(Fragment=1) | 3.22099669  | -0.00036946 | -0.15110211 |
| H(Fragment=1) | 3.44558710  | 0.00171616  | 0.92224502  |
| H(Fragment=1) | 4.07050215  | -0.00176906 | -0.84263412 |
| O(Fragment=1) | 2.07236220  | -0.00110618 | -0.55981199 |
| C(Fragment=2) | 0.10131924  | 0.00025249  | 1.05887086  |
| H(Fragment=2) | 0.54652180  | -0.93685814 | 1.39078810  |
| H(Fragment=2) | 0.54697235  | 0.93753443  | 1.38969999  |
| O(Fragment=2) | -0.91472997 | 0.00009109  | 0.36850209  |
| F(Fragment=2) | -1.92815065 | -2.27074742 | -0.36536487 |
| H(Fragment=2) | -1.55838085 | -1.43883108 | -0.09817666 |
| F(Fragment=2) | -1.92616462 | 2.27160883  | -0.36570034 |
| H(Fragment=2) | -1.55731849 | 1.43927750  | -0.09846887 |

1 2 1.0 3 1.0 4 2.0

2

3

4

5 6 1.0 7 1.0 8 2.0

6

7

8

9 10 1.0

10

11 12 1.0

12

## 2HCHO-3HF

optimized MP2/augccpVTZ/H2O HF donor HFHF acceptor

0 1 0 1 0 1

|               |             |             |             |
|---------------|-------------|-------------|-------------|
| C(Fragment=1) | 3.06565065  | -0.00009210 | -0.62364824 |
| H(Fragment=1) | 3.37068075  | -0.00031495 | -1.67215128 |
| H(Fragment=1) | 3.84349682  | 0.00002734  | 0.14409795  |
| O(Fragment=1) | 1.87972312  | 0.00002174  | -0.32310610 |
| C(Fragment=2) | -0.44548362 | -0.00027741 | -1.60759596 |
| H(Fragment=2) | -0.09688064 | 0.93751829  | -2.03988241 |
| H(Fragment=2) | -0.09674091 | -0.93816375 | -2.03957349 |
| O(Fragment=2) | -1.23408567 | -0.00017815 | -0.66730380 |
| F(Fragment=2) | -1.99147576 | 2.26913341  | 0.36052181  |
| H(Fragment=2) | -1.71952213 | 1.44292127  | -0.01463937 |
| F(Fragment=2) | -1.99120009 | -2.26915291 | 0.36123149  |
| H(Fragment=2) | -1.71931539 | -1.44302909 | -0.01420327 |
| F(Fragment=1) | 1.10708378  | 0.00048457  | 2.13522237  |
| H(Fragment=1) | 1.41250826  | 0.00032357  | 1.23431522  |

1 2 1.0 3 1.0 4 2.0

2

3

4

5 6 1.0 7 1.0 8 2.0

6

7

8

9 10 1.0

10

11 12 1.0

12

13 14 1.0

14

## 2HCHO-H2Odonor

MP2/augcccpVTZ/H2O optimized

0 1 0 1 0 1

|               |             |             |             |
|---------------|-------------|-------------|-------------|
| C(Fragment=1) | -0.91119364 | 1.79875080  | 0.01027726  |
| H(Fragment=1) | -0.16942543 | 2.60466835  | 0.01208147  |
| H(Fragment=1) | -1.96895846 | 2.08287699  | 0.01638127  |
| O(Fragment=1) | -0.56747752 | 0.62806722  | 0.00159688  |
| C(Fragment=2) | 2.22664084  | 0.09475510  | -0.00698395 |
| H(Fragment=2) | 2.10911207  | 0.64610454  | -0.94741925 |
| H(Fragment=2) | 2.12014692  | 0.67037825  | 0.92017263  |
| O(Fragment=2) | 2.47797655  | -1.09621247 | 0.00709508  |
| O(Fragment=1) | -2.58016602 | -1.39979259 | -0.10821379 |
| H(Fragment=1) | -2.73632019 | -1.69994926 | 0.79266236  |
| H(Fragment=1) | -1.88990227 | -0.72161155 | -0.01746378 |

1 2 1.0 3 1.0 4 2.0

2

3

4

5 6 1.0 7 1.0 8 2.0

6

7

8

9 10 1.0 11 1.0

10

11

## 2HCHO-H2Oacceptor

2 HCHO H2O acceptor MP2/augccpVTZ/H2O optimized v2

0 1 0 1 0 1

|               |             |             |             |
|---------------|-------------|-------------|-------------|
| C(Fragment=1) | 2.88569794  | -0.46868436 | 0.23259616  |
| H(Fragment=1) | 2.94660860  | 0.17875144  | 1.11648759  |
| H(Fragment=1) | 3.76340517  | -1.08429118 | 0.00358832  |
| O(Fragment=1) | 1.88660720  | -0.50138199 | -0.46323285 |
| C(Fragment=2) | -0.18928970 | 1.12694294  | 0.34363261  |
| H(Fragment=2) | -0.10358547 | 0.46355706  | 1.21057851  |
| H(Fragment=2) | 0.59317529  | 1.87971361  | 0.20792206  |
| O(Fragment=2) | -1.13084359 | 1.04779089  | -0.42833316 |
| O(Fragment=2) | -2.92902546 | -1.08710948 | 0.07406220  |
| H(Fragment=2) | -3.63760167 | -0.74435105 | 0.62758230  |
| H(Fragment=2) | -2.35435655 | -0.31732679 | -0.08350089 |

1 2 1.0 3 1.0 4 2.0

2

3

4

5 6 1.0 7 1.0 8 2.0

6

7

8

9 10 1.0 11 1.0

10

11

## 2HCHO-H2OH2Oacceptor

MP2/augccpVTZ/H2O optimized

0 1 0 1 0 1

|               |             |             |             |
|---------------|-------------|-------------|-------------|
| C(Fragment=1) | 3.29332531  | -0.00009980 | -0.11383162 |
| H(Fragment=1) | 3.44844728  | -0.00133429 | 0.97220565  |
| H(Fragment=1) | 4.18798005  | 0.00064284  | -0.74697304 |
| O(Fragment=1) | 2.17423384  | 0.00042237  | -0.59540940 |
| C(Fragment=2) | 0.07413121  | -0.00000433 | 1.07465504  |
| H(Fragment=2) | 0.54015034  | -0.93565487 | 1.39464749  |
| H(Fragment=2) | 0.53998928  | 0.93568909  | 1.39475217  |
| O(Fragment=2) | -0.95030517 | -0.00005247 | 0.40720927  |
| O(Fragment=2) | -1.89186158 | -2.55934914 | -0.45609580 |
| H(Fragment=2) | -2.59700411 | -2.82742253 | 0.14144008  |
| H(Fragment=2) | -1.62309490 | -1.68413493 | -0.13024218 |
| O(Fragment=2) | -1.89219548 | 2.55914852  | -0.45602821 |
| H(Fragment=2) | -2.59686272 | 2.82749756  | 0.14194475  |
| H(Fragment=2) | -1.62331727 | 1.68398769  | -0.13012231 |

1 2 1.0 3 1.0 4 2.0

2

3

4

5 6 1.0 7 1.0 8 2.0

6

7

8

9 10 1.0 11 1.0

10

11

12 13 1.0 14 1.0

13

14

## 2HCHO-H2Odonor-H2Oacceptor

MP2/augccpVTZ/H2O optimized

0 1 0 1 0 1

|               |             |             |             |
|---------------|-------------|-------------|-------------|
| C(Fragment=1) | -2.84513362 | -0.31262262 | 0.64447770  |
| H(Fragment=1) | -3.29997011 | -1.24743637 | 0.98731848  |
| H(Fragment=1) | -3.44482637 | 0.60088982  | 0.71877583  |
| O(Fragment=1) | -1.71046194 | -0.29197470 | 0.19614656  |
| C(Fragment=2) | 0.58881699  | -1.73161182 | -0.36621202 |
| H(Fragment=2) | 0.55549145  | -1.86996319 | 0.71953798  |
| H(Fragment=2) | -0.07625345 | -2.35459475 | -0.97219853 |
| O(Fragment=2) | 1.34351972  | -0.92419110 | -0.88255416 |
| O(Fragment=2) | 2.76055264  | 0.69999547  | 0.96564722  |
| H(Fragment=2) | 3.57280731  | 0.23305836  | 1.18561097  |
| H(Fragment=2) | 2.32282033  | 0.12363425  | 0.31471099  |
| H(Fragment=1) | -0.89300339 | 1.31675952  | -0.40346518 |
| O(Fragment=1) | -0.41244485 | 2.09715823  | -0.72597964 |
| H(Fragment=1) | -1.04849055 | 2.81515583  | -0.64596447 |

1 2 1.0 3 1.0 4 2.0

2

3

4

5 6 1.0 7 1.0 8 2.0

6

7

8

9 10 1.0 11 1.0

10

11

12 13 1.0  
13 14 1.0  
14

### 2HCHO-HFdonor-H2OH2Oacceptor

MP2/augccpVTZ/H2O optimized

0 1 0 1 0 1

|               |             |             |             |
|---------------|-------------|-------------|-------------|
| C(Fragment=1) | 3.10954052  | 0.03503373  | -0.37641883 |
| H(Fragment=1) | 3.61055988  | 0.00616759  | -1.34639151 |
| H(Fragment=1) | 3.72724123  | 0.05620092  | 0.52530448  |
| O(Fragment=1) | 1.88824323  | 0.04332217  | -0.30964607 |
| C(Fragment=2) | -0.47783286 | -0.04529076 | -1.73966081 |
| H(Fragment=2) | -0.15507711 | 0.89275134  | -2.20002846 |
| H(Fragment=2) | -0.09327760 | -0.97830165 | -2.16106788 |
| O(Fragment=2) | -1.24979987 | -0.05107998 | -0.79238115 |
| O(Fragment=2) | -1.81260098 | 2.48393070  | 0.41984746  |
| H(Fragment=2) | -2.59312362 | 2.85516999  | -0.00349841 |
| H(Fragment=2) | -1.69038472 | 1.62523680  | -0.01741700 |
| O(Fragment=2) | -1.61988578 | -2.57196940 | 0.51891607  |
| H(Fragment=2) | -2.39337754 | -2.99991097 | 0.13828991  |
| H(Fragment=2) | -1.56476597 | -1.72164912 | 0.05259224  |
| F(Fragment=1) | 0.72816144  | 0.11178057  | 1.98627503  |
| H(Fragment=1) | 1.16085368  | 0.08622422  | 1.13832870  |

1 2 1.0 3 1.0 4 2.0

2

3

4

5 6 1.0 7 1.0 8 2.0

6

7

8

9 10 1.0 11 1.0

10

11

12 13 1.0 14 1.0

13

14

15 16 1.0

16

### 2HCHO-H2Odonor-H2OH2Oacceptor

MP2/augccpVTZ/H2O optimized

0 1 0 1 0 1

|               |             |             |             |
|---------------|-------------|-------------|-------------|
| C(Fragment=1) | 3.20188786  | -0.00002370 | -0.35665181 |
| H(Fragment=1) | 3.71337209  | 0.00036033  | -1.32441588 |
| H(Fragment=1) | 3.82185659  | 0.00073047  | 0.54603505  |
| O(Fragment=1) | 1.98344359  | -0.00125595 | -0.28881897 |
| C(Fragment=2) | -0.33508188 | 0.00021491  | -1.69607945 |
| H(Fragment=2) | 0.04459773  | 0.93586175  | -2.11551252 |
| H(Fragment=2) | 0.04373120  | -0.93569239 | -2.11570152 |
| O(Fragment=2) | -1.16488131 | 0.00048692  | -0.79868399 |
| O(Fragment=2) | -1.78911979 | 2.55649757  | 0.33002397  |
| H(Fragment=2) | -2.49339037 | 2.94003405  | -0.20213430 |
| H(Fragment=2) | -1.63272825 | 1.68650332  | -0.07364962 |
| O(Fragment=2) | -1.79124736 | -2.55521295 | 0.32912662  |

|               |             |             |             |
|---------------|-------------|-------------|-------------|
| H(Fragment=2) | -2.49595930 | -2.93774400 | -0.20317228 |
| H(Fragment=2) | -1.63402197 | -1.68514762 | -0.07409787 |
| H(Fragment=1) | 1.00428800  | -0.00126469 | 1.34933150  |
| O(Fragment=1) | 0.43378563  | -0.00083785 | 2.13535690  |
| H(Fragment=1) | 1.05157223  | -0.00221049 | 2.87366875  |

1 2 1.0 3 1.0 4 2.0  
2  
3  
4  
5 6 1.0 7 1.0 8 2.0  
6  
7  
8  
9 10 1.0 11 1.0  
10  
11  
12 13 1.0 14 1.0  
13  
14  
15 16 1.0  
16 17 1.0  
17

## 2HCHO-urea

optimized MP2/augccpVTZ/H2O

|               |             |             |             |
|---------------|-------------|-------------|-------------|
| 0 1 0 1 0 1   |             |             |             |
| C(Fragment=1) | -4.52449411 | -0.65478658 | 0.00032521  |
| H(Fragment=1) | -4.91159197 | 0.37197108  | -0.00264526 |
| H(Fragment=1) | -5.26166172 | -1.46616013 | 0.00245055  |
| O(Fragment=1) | -3.32792792 | -0.88239806 | 0.00120646  |
| C(Fragment=2) | -1.70354246 | 1.32530890  | -0.00154133 |
| H(Fragment=2) | -2.24554629 | 1.49461930  | -0.93725830 |
| H(Fragment=2) | -2.24690661 | 1.49768632  | 0.93286060  |
| O(Fragment=2) | -0.53285767 | 0.98358822  | -0.00010892 |
| C(Fragment=2) | 2.72143737  | -0.24162258 | 0.00004307  |
| O(Fragment=2) | 3.93239193  | -0.49270407 | -0.00026430 |
| N(Fragment=2) | 1.99405090  | -0.13314803 | 1.15194729  |
| H(Fragment=2) | 2.52943787  | -0.02778510 | 1.99612001  |
| H(Fragment=2) | 1.08397876  | 0.30172469  | 1.11873271  |
| N(Fragment=2) | 1.99292648  | -0.13546283 | -1.15130193 |
| H(Fragment=2) | 2.52734298  | -0.03246652 | -1.99637082 |
| H(Fragment=2) | 1.08284982  | 0.29939923  | -1.11803479 |

1 2 1.0 3 1.0 4 2.0  
2  
3  
4  
5 6 1.0 7 1.0 8 2.0  
6  
7  
8  
9 10 2.0 11 1.5 14 1.5  
10  
11 12 1.0 13 1.0  
12  
13  
14 15 1.0 16 1.0  
15  
16

## 2HCHO-thiourea

optimized MP2/augccpVTZ/H2O

0 1 0 1 0 1

|               |             |             |             |
|---------------|-------------|-------------|-------------|
| C(Fragment=1) | -5.00459147 | -0.79102332 | -0.00459119 |
| H(Fragment=1) | -5.43015176 | 0.22037998  | -0.01750536 |
| H(Fragment=1) | -5.71037810 | -1.62972792 | -0.00282328 |
| O(Fragment=1) | -3.80023997 | -0.97318856 | 0.00732121  |
| C(Fragment=2) | -2.27428546 | 1.28645559  | 0.00001451  |
| H(Fragment=2) | -2.82332083 | 1.42946781  | -0.93543348 |
| H(Fragment=2) | -2.82216857 | 1.43502487  | 0.93525321  |
| O(Fragment=2) | -1.08837238 | 0.99944854  | 0.00014095  |
| C(Fragment=2) | 2.17031478  | -0.01587781 | -0.00022813 |
| N(Fragment=2) | 1.49651104  | 0.19679401  | 1.13844132  |
| H(Fragment=2) | 1.97028909  | 0.04832904  | 2.01078632  |
| H(Fragment=2) | 0.53123707  | 0.49812620  | 1.12608988  |
| N(Fragment=2) | 1.49543516  | 0.19508789  | -1.13856940 |
| H(Fragment=2) | 1.96816685  | 0.04460793  | -2.01113625 |
| H(Fragment=2) | 0.53007550  | 0.49615878  | -1.12570455 |
| S(Fragment=2) | 3.78768120  | -0.52330916 | -0.00059365 |

1 2 1.0 3 1.0 4 2.0

2

3

4

5 6 1.0 7 1.0 8 2.0

6

7

8

9 10 1.0 13 1.0 16 2.0

10 11 1.0 12 1.0

11

12

13 14 1.0 15 1.0

14

15

16

## 2HCHO-guanidinium

optimized MP2/augccpVTZ/H2O

1 1

|   |             |             |             |
|---|-------------|-------------|-------------|
| C | 4.58856579  | -0.63771016 | -0.00236654 |
| H | 4.96994413  | 0.39075836  | 0.02186050  |
| H | 5.32949251  | -1.44534747 | -0.01277516 |
| O | 3.39304841  | -0.87163956 | -0.01719523 |
| C | 1.73476654  | 1.25752028  | 0.01444805  |
| H | 2.26698876  | 1.43373255  | 0.95310844  |
| H | 2.26802781  | 1.46181382  | -0.91786324 |
| O | 0.57542522  | 0.87480313  | 0.00805966  |
| C | -2.56458763 | -0.17065033 | -0.00127246 |
| N | -1.92773674 | 0.04574134  | -1.14706198 |
| H | -2.38999324 | -0.09335816 | -2.02810673 |
| H | -0.96626428 | 0.35784659  | -1.12811381 |
| N | -1.92237626 | 0.01708919  | 1.14646288  |
| H | -2.38342455 | -0.13520258 | 2.02593217  |
| H | -0.96085960 | 0.32950745  | 1.13076152  |
| N | -3.83219260 | -0.57536942 | -0.00344177 |
| H | -4.32670983 | -0.72856800 | 0.85722771  |
| H | -4.33131977 | -0.70367757 | -0.86551509 |

1 2 1.0 3 1.0 4 2.0

2

3



4  
 5 6 1.0 7 1.0 8 2.0  
 6  
 7  
 8  
 9 10 1.5 13 1.5 16 1.5  
 10 11 1.0 12 1.0  
 11  
 12  
 13 14 1.0 15 1.0  
 14  
 15  
 16 17 1.0 18 1.0  
 17  
 18

*The above structure had one negative/imaginary frequency.*

### 2HCHO-Hacceptor

2 HCHO H+ acceptor MP2/augccpVTZ/H2O optimized

1 1  
 C 1.69336256 0.03188241 -0.22274492  
 H 1.72099566 0.99334734 -0.72923833  
 H 2.56530593 -0.60778909 -0.15795756  
 O 0.65499621 -0.38038806 0.31322429  
 C -0.63938367 0.49958767 0.24343089  
 H -0.79561544 0.71158833 1.29488227  
 H -0.35070024 1.35624916 -0.35543888  
 O -1.58261830 -0.22606953 -0.36875987  
 H -2.04288249 -0.79055553 0.26792122

1 2 1.0 3 1.0 4 2.0  
 2  
 3  
 4  
 5 6 1.0 7 1.0 8 2.0  
 6  
 7  
 8  
 9

### 2HCHO-Liacceptor

MP2/augccpVTZ/H2O optimized

1 1  
 C -2.38962737 -0.00846576 0.14116709  
 H -2.36510816 -1.00351365 0.60265795  
 H -3.36902111 0.47440027 0.04608271  
 O -1.37192439 0.53610575 -0.24824384  
 C 0.96935565 -0.77758511 0.15127220  
 H 0.64628360 -0.62861975 1.18502376  
 H 0.45349774 -1.54269102 -0.43431408  
 O 1.89011231 -0.13711408 -0.33005547  
 Li 3.00349162 1.40826532 0.49076947

1 2 1.0 3 1.0 4 2.0  
 2  
 3

4  
5 6 1.0 7 1.0 8 2.0  
6  
7  
8  
9

### 2HCHO-Naacceptor

MP2/augccpVTZ/H2O optimized

|     |             |             |             |
|-----|-------------|-------------|-------------|
| 1 1 |             |             |             |
| C   | 3.02270816  | -0.38392012 | 0.21886214  |
| H   | 3.11040789  | 0.42599014  | 0.95406504  |
| H   | 3.90939244  | -1.00730030 | 0.05494352  |
| O   | 1.98528773  | -0.58115151 | -0.38808798 |
| C   | -0.08345321 | 1.13850324  | 0.22794044  |
| H   | 0.13279629  | 0.71473906  | 1.21367444  |
| H   | 0.63814956  | 1.85280746  | -0.17998930 |
| O   | -1.09863347 | 0.84691982  | -0.38393320 |
| Na  | -2.95631909 | -0.78544378 | 0.13206002  |

1 2 1.0 3 1.0 4 2.0  
2  
3  
4  
5 6 1.0 7 1.0 8 2.0  
6  
7  
8  
9

### 2HCHO-Kacceptor

MP2/augccpVTZ-6311pp3d3p/H2O optimized

|               |             |             |             |
|---------------|-------------|-------------|-------------|
| 1 1 0 1 1 1   |             |             |             |
| C(Fragment=1) | 3.61145868  | -0.55478598 | 0.09208329  |
| H(Fragment=1) | 3.89492297  | 0.41560556  | 0.51939928  |
| H(Fragment=1) | 4.41087403  | -1.29328376 | -0.04058871 |
| O(Fragment=1) | 2.46016543  | -0.79970983 | -0.22067599 |
| C(Fragment=2) | 0.66170827  | 1.25075631  | 0.32652322  |
| H(Fragment=2) | 0.63200645  | 0.70048128  | 1.27489530  |
| H(Fragment=2) | 1.56964343  | 1.83104761  | 0.11509279  |
| O(Fragment=2) | -0.27630992 | 1.23577847  | -0.44970856 |
| K(Fragment=2) | -2.82196277 | -0.49043273 | 0.05171783  |

1 2 1.0 3 1.0 4 2.0  
2  
3  
4  
5 6 1.0 7 1.0 8 2.0  
6  
7  
8  
9

# Coordinates of structures of Ac-Pro-NMe<sub>2</sub> as a function of ring pucker, main chain conformation, and explicit solvation

## Ac-Pro-NMe<sub>2</sub>-endo-alpha-guanidinium

optimized M062X/juncppVTZ/H<sub>2</sub>O

```
1 1
N      -2.23975966 -0.66177969  0.27065752
O      -1.96894689  0.55080464  2.13892213
O       1.23475533  0.32224451  0.07113644
C      -3.02961658 -1.36141201 -0.74884696
C      -1.99576685 -1.69990981 -1.82201138
C      -0.69690326 -1.86443316 -1.03225961
C      -0.80898992 -0.82067961  0.09237325
C      -2.72497665  0.00596478  1.33749155
C      -4.22319101  0.07000274  1.46362619
C       0.02125424  0.43419021 -0.17784267
C       0.44481599  2.72067489 -0.69978965
H      -0.36935369 -1.19671857  1.01573722
H      -3.83242639 -0.72648732 -1.12244773
H      -3.47410339 -2.26528645 -0.32803992
H       0.19843295 -1.72449904 -1.63292053
H      -0.65362115 -2.85554815 -0.58325476
H      -4.47815883  0.51587899  2.41913397
H      -4.66888195 -0.92054208  1.38231196
H      -4.63366153  0.68332710  0.65944310
H       1.07585833  2.66302310 -1.58763506
H       1.07785399  2.73626308  0.18301348
H      -0.14198749  3.63349462 -0.73651048
H      -2.26595920 -2.59513402 -2.37533620
H      -1.90435556 -0.88270366 -2.53728961
N      -0.47164072  1.58381478 -0.63624594
C      -1.83257006  1.84098406 -1.09832435
H      -1.77814185  2.59207459 -1.88243321
H      -2.28875616  0.95679201 -1.52221146
H      -2.45479467  2.22467208 -0.28808165
C       4.38350746 -0.37153522  0.30074932
N       3.46918873 -1.26623691  0.64937500
H       3.73945440 -2.16154066  1.01656603
H       2.48718320 -1.01789344  0.56435223
N       3.99114990  0.81057025 -0.15599731
H       4.66122115  1.50206196 -0.44317888
H       2.99601087  1.00065655 -0.22607355
N       5.67858973 -0.65794477  0.40505229
H       6.38051769  0.01971760  0.16449399
H       5.98312558 -1.54804853  0.75900740
```

```
1 4 1.0 7 1.0 8 1.5
2 8 2.0
3 10 2.0
4 5 1.0 13 1.0 14 1.0
5 6 1.0 23 1.0 24 1.0
6 7 1.0 15 1.0 16 1.0
7 10 1.0 12 1.0
8 9 1.0
9 17 1.0 18 1.0 19 1.0
10 25 1.5
11 20 1.0 21 1.0 22 1.0 25 1.0
12
13
14
15
16
17
18
```

19  
20  
21  
22  
23  
24  
25 26 1.0  
26 27 1.0 28 1.0 29 1.0  
27  
28  
29  
30 31 1.5 34 1.5 37 1.5  
31 32 1.0 33 1.0  
32  
33  
34 35 1.0 36 1.0  
35  
36  
37 38 1.0 39 1.0  
38  
39

### Ac-Pro-NMe2-endo-alpha-H2OcisHFtrans

optimized M062X/juncppVTZ/H2O

0 1  
N -1.62499096 0.38834121 -0.12312502  
O -1.40490203 -0.77102440 -2.03064185  
O 1.96872302 0.10937233 -0.41505938  
C -2.37548440 0.94438827 1.00881002  
C -1.27816137 1.49727619 1.91788895  
C -0.16888075 1.89265199 0.94273103  
C -0.24098184 0.81606645 -0.15277340  
C -2.12802632 -0.36357322 -1.12488068  
C -3.59487199 -0.68886066 -1.04626647  
C 0.83866596 -0.25300292 -0.00558008  
C 1.74485468 -2.42949123 0.37958901  
H -0.01472025 1.24369574 -1.12966332  
H -2.97543684 0.17442803 1.49313156  
H -3.04408621 1.73633557 0.66675658  
H 0.81594961 1.95088721 1.39949862  
H -0.38800753 2.85820856 0.48989598  
H -3.88953927 -1.21006731 -1.95080242  
H -4.18944100 0.21634608 -0.92700225  
H -3.78803941 -1.32669433 -0.18218078  
H 1.32830557 -3.42926802 0.45266286  
H 2.46750832 -2.27862032 1.18108737  
H 2.24711267 -2.31880912 -0.57724140  
H -1.62973117 2.33479411 2.51407510  
H -0.92402150 0.72652176 2.60279861  
N 0.64534280 -1.46860948 0.48018369  
C -0.56519359 -1.97003603 1.12901010  
H -0.25653452 -2.69204677 1.88060949  
H -1.10775018 -1.18108320 1.63107204  
H -1.21300289 -2.46778361 0.40656223  
H 2.24055787 1.90533202 -0.87775397  
O 2.31528343 2.85861679 -1.04648979  
H 2.79082262 2.93223355 -1.87778306  
F 4.28963207 -0.60865423 0.00971399  
H 3.35654487 -0.38287476 -0.13620260

1 4 1.0 7 1.0 8 1.5  
2 8 2.0  
3 10 2.0  
4 5 1.0 13 1.0 14 1.0  
5 6 1.0 23 1.0 24 1.0

6 7 1.0 15 1.0 16 1.0  
 7 10 1.0 12 1.0  
 8 9 1.0  
 9 17 1.0 18 1.0 19 1.0  
 10 25 1.5  
 11 20 1.0 21 1.0 22 1.0 25 1.0  
 12  
 13  
 14  
 15  
 16  
 17  
 18  
 19  
 20  
 21  
 22  
 23  
 24  
 25 26 1.0  
 26 27 1.0 28 1.0 29 1.0  
 27  
 28  
 29  
 30 31 1.0  
 31 32 1.0  
 32  
 33 34 1.0  
 34

**Ac-Pro-NMe2-endo-alpha-H2Ocis**

optimized M062X/juncppVTZ/H2O

0 1  
 N 1.14403841 -0.61498233 -0.11418050  
 O 1.20895538 0.49404208 -2.06512154  
 O -2.31891635 0.44098548 -0.38785239  
 C 1.74585458 -1.27659359 1.04978507  
 C 0.54475945 -1.55216191 1.95304185  
 C -0.60547845 -1.74438540 0.96479744  
 C -0.30273790 -0.72739256 -0.14684089  
 C 1.81041402 -0.02915232 -1.12935936  
 C 3.31264245 -0.02875002 -1.03204392  
 C -1.14095391 0.54961935 -0.01653160  
 C -1.52714968 2.88747468 0.38644947  
 H -0.61138602 -1.11188991 -1.11835974  
 H 2.49065262 -0.63549136 1.52128915  
 H 2.23451412 -2.20440441 0.74629969  
 H -1.58938066 -1.59489386 1.40218020  
 H -0.57172556 -2.74597259 0.53796439  
 H 3.72546305 0.37418162 -1.95076654  
 H 3.69554028 -1.03444234 -0.86198602  
 H 3.62939730 0.59105510 -0.19158206  
 H -1.99525919 3.07025141 1.35492488  
 H -2.29681253 2.74197486 -0.36194233  
 H -0.91647139 3.74888089 0.12259407  
 H 0.70642642 -2.41855813 2.58865988  
 H 0.34757251 -0.69545846 2.59794554  
 N -0.66605395 1.71076933 0.44809948  
 C 0.63886233 1.95403386 1.05231097  
 H 0.52157961 2.76489514 1.76794687  
 H 1.00197054 1.09121164 1.59396512  
 H 1.37230080 2.25641894 0.30244961  
 H -2.96381725 -1.15595494 -0.85667339  
 O -3.29060726 -2.05328214 -1.06406969  
 H -3.77918740 -1.96242831 -1.88564748

1 4 1.0 7 1.0 8 1.5  
 2 8 2.0  
 3 10 2.0  
 4 5 1.0 13 1.0 14 1.0  
 5 6 1.0 23 1.0 24 1.0  
 6 7 1.0 15 1.0 16 1.0  
 7 10 1.0 12 1.0  
 8 9 1.0  
 9 17 1.0 18 1.0 19 1.0  
 10 25 1.5  
 11 20 1.0 21 1.0 22 1.0 25 1.0  
 12  
 13  
 14  
 15  
 16  
 17  
 18  
 19  
 20  
 21  
 22  
 23  
 24  
 25 26 1.0  
 26 27 1.0 28 1.0 29 1.0  
 27  
 28  
 29  
 30 31 1.0  
 31 32 1.0  
 32

**Ac-Pro-NMe2-endo-alpha-HFcis**

optimized M062X/juncppVTZ/H2O

|     |             |             |             |
|-----|-------------|-------------|-------------|
| 0 1 |             |             |             |
| N   | 1.19919113  | -0.50161181 | -0.13583008 |
| O   | 1.07762195  | 0.70495049  | -2.02337233 |
| O   | -2.36336513 | 0.14086785  | -0.38496004 |
| C   | 1.90220933  | -1.13842265 | 0.98360678  |
| C   | 0.76481300  | -1.59207372 | 1.89780404  |
| C   | -0.38455966 | -1.87260333 | 0.92935438  |
| C   | -0.21989284 | -0.79698436 | -0.15906175 |
| C   | 1.76419786  | 0.21542681  | -1.12967421 |
| C   | 3.25585147  | 0.39947074  | -1.05644476 |
| C   | -1.19737835 | 0.36596899  | 0.01063840  |
| C   | -1.87939287 | 2.61610577  | 0.50535393  |
| H   | -0.48759732 | -1.19403709 | -1.13809122 |
| H   | 2.57784112  | -0.43461952 | 1.46891089  |
| H   | 2.48804799  | -1.98831932 | 0.62883602  |
| H   | -1.36590854 | -1.83873585 | 1.39587539  |
| H   | -0.26059402 | -2.85130371 | 0.46844651  |
| H   | 3.59573331  | 0.89340166  | -1.96047368 |
| H   | 3.76256246  | -0.55815239 | -0.94182703 |
| H   | 3.51169530  | 1.01327758  | -0.19112154 |
| H   | -1.37210727 | 3.54818202  | 0.26472526  |
| H   | -2.35171529 | 2.71253456  | 1.48336451  |
| H   | -2.63396815 | 2.40542436  | -0.24229450 |
| H   | 1.04048528  | -2.46335772 | 2.48550491  |
| H   | 0.49023122  | -0.79607580 | 2.58993403  |
| N   | -0.88339429 | 1.54670824  | 0.52890136  |
| C   | 0.38188425  | 1.92810290  | 1.15024622  |
| H   | 0.16004397  | 2.68714193  | 1.89667847  |
| H   | 0.85348695  | 1.09683697  | 1.65594743  |

|   |             |             |             |
|---|-------------|-------------|-------------|
| H | 1.06511392  | 2.35291283  | 0.41387321  |
| F | -2.95755417 | -2.03008977 | -1.29217553 |
| H | -2.70638883 | -1.14647122 | -0.92448703 |

1 4 1.0 7 1.0 8 1.5  
 2 8 2.0  
 3 10 2.0  
 4 5 1.0 13 1.0 14 1.0  
 5 6 1.0 23 1.0 24 1.0  
 6 7 1.0 15 1.0 16 1.0  
 7 10 1.0 12 1.0  
 8 9 1.0  
 9 17 1.0 18 1.0 19 1.0  
 10 25 1.5  
 11 20 1.0 21 1.0 22 1.0 25 1.0  
 12  
 13  
 14  
 15  
 16  
 17  
 18  
 19  
 20  
 21  
 22  
 23  
 24  
 25 26 1.0  
 26 27 1.0 28 1.0 29 1.0  
 27  
 28  
 29  
 30 31 1.0  
 31

**Ac-Pro-NMe2-endo-alpha-HFdonor-HFHAcceptor**

optimized M062X/juncppVTZ/H2O

|     |             |             |             |
|-----|-------------|-------------|-------------|
| 0 1 |             |             |             |
| N   | 1.26957927  | 0.92463363  | 0.05027366  |
| O   | 1.66885161  | -1.10249960 | 0.88418800  |
| O   | -2.08065328 | -0.38035496 | 0.53290645  |
| C   | 1.62469333  | 2.19230205  | -0.60785066 |
| C   | 0.26595480  | 2.83788076  | -0.87111378 |
| C   | -0.60479670 | 2.32702568  | 0.27685563  |
| C   | -0.11323424 | 0.88599527  | 0.49521648  |
| C   | 2.10324359  | -0.07876478 | 0.32265700  |
| C   | 3.53430135  | 0.06877661  | -0.09426288 |
| C   | -1.03145117 | -0.15563078 | -0.13495811 |
| C   | -1.69547484 | -1.91005223 | -1.61760685 |
| H   | -0.13740080 | 0.62158242  | 1.55214457  |
| H   | 2.19096674  | 2.00622094  | -1.51910525 |
| H   | 2.23344440  | 2.79909387  | 0.06310545  |
| H   | -1.67062422 | 2.37066262  | 0.06906828  |
| H   | -0.41088276 | 2.89594934  | 1.18440582  |
| H   | 4.11317088  | -0.76439159 | 0.29078445  |
| H   | 3.94492294  | 1.00915383  | 0.27052323  |
| H   | 3.59728896  | 0.07796690  | -1.18359603 |
| H   | -1.14955669 | -2.58354075 | -2.27102061 |
| H   | -2.57358891 | -1.52973413 | -2.13839452 |
| H   | -2.00713835 | -2.44716332 | -0.72727612 |
| H   | 0.33375185  | 3.92158984  | -0.89468546 |
| H   | -0.13559043 | 2.50639076  | -1.82876983 |
| N   | -0.79750632 | -0.81067525 | -1.25217585 |
| C   | 0.26993418  | -0.54541403 | -2.21695539 |

|   |             |             |             |
|---|-------------|-------------|-------------|
| H | -0.12778264 | -0.75947404 | -3.20547136 |
| H | 0.57771946  | 0.49058230  | -2.20184128 |
| H | 1.12348353  | -1.19781356 | -2.03110737 |
| F | -4.35459391 | -1.26563059 | -0.05995919 |
| H | -3.46621115 | -0.95171277 | 0.11990860  |
| F | -2.49520098 | 0.94040809  | 2.59826608  |
| H | -2.33684888 | 0.41690818  | 1.80000166  |
| F | 3.20341521  | -2.93629022 | 1.37713308  |
| H | 2.58917425  | -2.19623987 | 1.17703718  |

1 4 1.0 7 1.0 8 1.5  
2 8 2.0  
3 10 2.0  
4 5 1.0 13 1.0 14 1.0  
5 6 1.0 23 1.0 24 1.0  
6 7 1.0 15 1.0 16 1.0  
7 10 1.0 12 1.0  
8 9 1.0  
9 17 1.0 18 1.0 19 1.0  
10 25 2.0  
11 20 1.0 21 1.0 22 1.0 25 1.0  
12  
13  
14  
15  
16  
17  
18  
19  
20  
21  
22  
23  
24  
25 26 1.0  
26 27 1.0 28 1.0 29 1.0  
27  
28  
29  
30 31 1.0  
31  
32 33 1.0  
33  
34 35 1.0  
35

**Ac-Pro-NMe2-endo-alpha-HFdonor**

optimized M062X/juncppVTZ/H2O

|     |             |             |             |
|-----|-------------|-------------|-------------|
| 0 1 |             |             |             |
| N   | -0.28656586 | 1.08585270  | -0.12228176 |
| O   | -1.72939815 | -0.51710248 | -0.68940603 |
| O   | 1.90250515  | -1.43939070 | -1.52184001 |
| C   | 0.12187514  | 2.33224841  | 0.54245495  |
| C   | 1.63506178  | 2.35874610  | 0.33672238  |
| C   | 1.83022816  | 1.62045283  | -0.98789149 |
| C   | 0.76045474  | 0.51824050  | -0.96435915 |
| C   | -1.49817958 | 0.54263617  | -0.07169237 |
| C   | -2.53938841 | 1.22735208  | 0.76188448  |
| C   | 1.32864547  | -0.86050072 | -0.60012456 |
| C   | 1.64951041  | -2.78434245 | 0.81419729  |
| H   | 0.35378024  | 0.34720344  | -1.95909111 |
| H   | -0.16657006 | 2.32195618  | 1.59255591  |
| H   | -0.35979207 | 3.18299378  | 0.05867878  |
| H   | 2.82918730  | 1.21248062  | -1.11521043 |
| H   | 1.62493852  | 2.29013434  | -1.82167203 |



|   |             |             |             |
|---|-------------|-------------|-------------|
| H | -3.50087249 | 0.74705266  | 0.61202761  |
| H | -2.60626807 | 2.28323387  | 0.50379762  |
| H | -2.26440126 | 1.16064664  | 1.81583124  |
| H | 2.58759749  | -2.81262327 | 1.37074085  |
| H | 1.78797307  | -3.25970498 | -0.14919387 |
| H | 0.88931021  | -3.31910116 | 1.38266036  |
| H | 2.01829119  | 3.37491935  | 0.31146036  |
| H | 2.14097550  | 1.83084568  | 1.14455788  |
| N | 1.21046682  | -1.40736028 | 0.62343902  |
| C | 0.67417694  | -0.78260917 | 1.82543462  |
| H | 1.16437826  | -1.24322029 | 2.68063693  |
| H | 0.88608067  | 0.27815626  | 1.86541517  |
| H | -0.40129567 | -0.94837768 | 1.91795478  |
| F | -3.95098994 | -1.49817712 | -0.59360561 |
| H | -3.05087403 | -1.09384535 | -0.62658875 |

1 4 1.0 7 1.0 8 1.5  
 2 8 2.0  
 3 10 2.0  
 4 5 1.0 13 1.0 14 1.0  
 5 6 1.0 23 1.0 24 1.0  
 6 7 1.0 15 1.0 16 1.0  
 7 10 1.0 12 1.0  
 8 9 1.0  
 9 17 1.0 18 1.0 19 1.0  
 10 25 1.5  
 11 20 1.0 21 1.0 22 1.0 25 1.0  
 12  
 13  
 14  
 15  
 16  
 17  
 18  
 19  
 20  
 21  
 22  
 23  
 24  
 25 26 1.0  
 26 27 1.0 28 1.0 29 1.0  
 27  
 28  
 29  
 30 31 1.0  
 31

### Ac-Pro-NMe2-endo-alpha-HFHAcceptor

optimized M062X/juncppVTZ/H2O

|   |             |             |             |
|---|-------------|-------------|-------------|
| O | 1           |             |             |
| N | -1.64020942 | 0.35784364  | -0.11519242 |
| O | -1.38645047 | -0.83890770 | -1.99384609 |
| O | 1.96596546  | 0.21017443  | -0.43388588 |
| C | -2.40055777 | 0.91360623  | 1.01057389  |
| C | -1.31544252 | 1.53001112  | 1.89275760  |
| C | -0.23397399 | 1.94627577  | 0.89530671  |
| C | -0.27678332 | 0.83983345  | -0.17259621 |
| C | -2.12119202 | -0.43733787 | -1.09548443 |
| C | -3.57389684 | -0.81415848 | -0.99886895 |
| C | 0.84099595  | -0.18370965 | -0.00935546 |
| C | 1.84584304  | -2.31089613 | 0.41163437  |
| H | -0.08159478 | 1.24917188  | -1.16435650 |
| H | -2.96519011 | 0.13318572  | 1.51982556  |
| H | -3.10215942 | 1.67044321  | 0.65581955  |

|   |             |             |             |
|---|-------------|-------------|-------------|
| H | 0.75210406  | 2.05553549  | 1.33972840  |
| H | -0.49886081 | 2.88949936  | 0.42055848  |
| H | -3.85156475 | -1.37895617 | -1.88229939 |
| H | -4.20075487 | 0.07274827  | -0.91130052 |
| H | -3.74144771 | -1.42540270 | -0.11060523 |
| H | 1.46384636  | -3.32455723 | 0.48007057  |
| H | 2.54782562  | -2.13150909 | 1.22516326  |
| H | 2.35507473  | -2.18197116 | -0.53863041 |
| H | -1.69240409 | 2.36683569  | 2.47403061  |
| H | -0.92288480 | 0.78963318  | 2.59010854  |
| N | 0.70828069  | -1.39128591 | 0.49772370  |
| C | -0.47633022 | -1.93063637 | 1.16691034  |
| H | -0.12925065 | -2.62532611 | 1.92693063  |
| H | -1.04614144 | -1.15514599 | 1.65910693  |
| H | -1.10574223 | -2.46803579 | 0.45720144  |
| F | 4.33415265  | -0.40323716 | 0.10373179  |
| H | 3.40907419  | -0.22164981 | -0.08081210 |
| F | 2.20546784  | 2.51639636  | -1.31924983 |
| H | 2.10889353  | 1.61310215  | -0.98200785 |

1 4 1.0 7 1.0 8 1.5  
 2 8 2.0  
 3 10 2.0  
 4 5 1.0 13 1.0 14 1.0  
 5 6 1.0 23 1.0 24 1.0  
 6 7 1.0 15 1.0 16 1.0  
 7 10 1.0 12 1.0  
 8 9 1.0  
 9 17 1.0 18 1.0 19 1.0  
 10 25 2.0  
 11 20 1.0 21 1.0 22 1.0 25 1.0  
 12  
 13  
 14  
 15  
 16  
 17  
 18  
 19  
 20  
 21  
 22  
 23  
 24  
 25 26 1.0  
 26 27 1.0 28 1.0 29 1.0  
 27  
 28  
 29  
 30 31 1.0  
 31  
 32 33 1.0  
 33

#### Ac-Pro-NMe2-endo-alpha-HFHFdonor-HFHFacceptor

optimized M062X/juncppVTZ/H2O

|     |             |             |             |
|-----|-------------|-------------|-------------|
| O 1 |             |             |             |
| N   | -1.20851594 | 1.08461556  | -0.09366799 |
| O   | -1.90593960 | -1.00323034 | -0.54437739 |
| O   | 2.16971639  | -0.27833192 | -0.36903717 |
| C   | -1.42630454 | 2.48095873  | 0.33892614  |
| C   | -0.01749503 | 3.06311123  | 0.35256187  |
| C   | 0.68816495  | 2.29301324  | -0.76128888 |
| C   | 0.14570724  | 0.86567245  | -0.59136530 |
| C   | -2.15784860 | 0.16456661  | -0.15312663 |

|   |             |             |             |
|---|-------------|-------------|-------------|
| C | -3.53483718 | 0.54350996  | 0.28885000  |
| C | 1.09344306  | -0.00700841 | 0.22873506  |
| C | 1.73694441  | -1.53564557 | 1.94672110  |
| H | 0.09455387  | 0.34526337  | -1.54926337 |
| H | -1.91554251 | 2.50902458  | 1.31084641  |
| H | -2.06053281 | 2.98848622  | -0.38783698 |
| H | 1.77202436  | 2.32684900  | -0.70245843 |
| H | 0.38148861  | 2.66655047  | -1.73683599 |
| H | -4.22453425 | -0.26614637 | 0.07595110  |
| H | -3.86133182 | 1.45348646  | -0.21158882 |
| H | -3.52763576 | 0.73765228  | 1.36263525  |
| H | 1.17164301  | -2.13904890 | 2.65088626  |
| H | 2.58969302  | -1.08609182 | 2.45417488  |
| H | 2.08349125  | -2.16175908 | 1.13058138  |
| H | -0.02484591 | 4.13610889  | 0.18625749  |
| H | 0.46616934  | 2.87202921  | 1.31160266  |
| N | 0.84126243  | -0.50075487 | 1.42299388  |
| C | -0.21739303 | -0.07681609 | 2.34127505  |
| H | 0.17215201  | -0.18574590 | 3.34969851  |
| H | -0.47359296 | 0.96479556  | 2.20049282  |
| H | -1.10010922 | -0.70781977 | 2.23695139  |
| F | 4.45461662  | -0.86810045 | 0.49075074  |
| H | 3.56325304  | -0.66026042 | 0.20434451  |
| F | 2.37363367  | 0.27067732  | -2.78464976 |
| H | 2.31129375  | 0.05130755  | -1.84473145 |
| F | -3.75673969 | -2.67813463 | -0.64482652 |
| H | -3.04444612 | -2.03011660 | -0.60634977 |
| F | 0.13457370  | -2.34540323 | -1.11438355 |
| H | -0.62967709 | -1.80861564 | -0.90307119 |

1 4 1.0 7 1.0 8 1.5  
2 8 2.0  
3 10 2.0  
4 5 1.0 13 1.0 14 1.0  
5 6 1.0 23 1.0 24 1.0  
6 7 1.0 15 1.0 16 1.0  
7 10 1.0 12 1.0  
8 9 1.0  
9 17 1.0 18 1.0 19 1.0  
10 25 2.0  
11 20 1.0 21 1.0 22 1.0 25 1.0  
12  
13  
14  
15  
16  
17  
18  
19  
20  
21  
22  
23  
24  
25 26 1.0  
26 27 1.0 28 1.0 29 1.0  
27  
28  
29  
30 31 1.0  
31  
32 33 1.0  
33  
34 35 1.0  
35  
36 37 1.0  
37

**Ac-Pro-NMe2-endo-alpha-HFHFdonor**

optimized M062X/juncppVTZ/H2O

0 1  
N -0.10069221 1.23477364 -0.17007580  
O -1.78834967 -0.22810523 -0.42393661  
O 2.13797716 -1.52280354 -1.03505782  
C 0.46340766 2.52221137 0.28249699  
C 1.95452087 2.36304932 0.00750300  
C 1.98277159 1.44948536 -1.21593350  
C 0.87296342 0.43523152 -0.91788418  
C -1.36193962 0.88224615 -0.00946463  
C -2.27565305 1.82360813 0.71009439  
C 1.43125167 -0.85317287 -0.28807269  
C 1.51361862 -2.61326264 1.33333822  
H 0.40491337 0.07509640 -1.83377311  
H 0.23176495 2.69470147 1.33197890  
H 0.03411873 3.33191849 -0.30824259  
H 2.93709254 0.95873604 -1.37909837  
H 1.72094948 2.01258484 -2.11083372  
H -3.29871826 1.47090562 0.63375911  
H -2.19566982 2.82872435 0.30054198  
H -1.98938862 1.86864428 1.76245214  
H 0.79489378 -2.99087342 2.05745775  
H 2.50849656 -2.62068095 1.78284898  
H 1.51603117 -3.24987167 0.45533542  
H 2.43606686 3.32169610 -0.16175206  
H 2.44738514 1.87871751 0.85173758  
N 1.11900741 -1.26103873 0.95550436  
C 0.59522708 -0.44677534 2.04636481  
H 1.02389023 -0.82344012 2.97266199  
H 0.89437720 0.59073322 1.95629585  
H -0.49137934 -0.51829211 2.12087500  
F -4.17347108 -0.83177911 -0.07786289  
H -3.24567571 -0.59075754 -0.20900813  
F -0.88662927 -2.27427491 -1.54745477  
H -1.17048090 -1.46865641 -1.11207670

1 4 1.0 7 1.0 8 2.0  
2 8 2.0  
3 10 2.0  
4 5 1.0 13 1.0 14 1.0  
5 6 1.0 23 1.0 24 1.0  
6 7 1.0 15 1.0 16 1.0  
7 10 1.0 12 1.0  
8 9 1.0  
9 17 1.0 18 1.0 19 1.0  
10 25 1.5  
11 20 1.0 21 1.0 22 1.0 25 1.0  
12  
13  
14  
15  
16  
17  
18  
19  
20  
21  
22  
23  
24  
25 26 1.0  
26 27 1.0 28 1.0 29 1.0  
27

28  
29  
30 31 1.0  
31  
32 33 1.0  
33

**Ac-Pro-NMe2-endo-alpha-HFtrans**

optimized M062X/juncppVTZ/H2O

0 1  
N -1.52060990 0.22010090 -0.29537756  
O -1.14657500 -1.67570619 -1.43527252  
O 2.02260158 0.38916375 -0.96336147  
C -2.31879510 1.12667200 0.53830640  
C -1.32107894 2.21738514 0.92535431  
C -0.35750647 2.26217326 -0.26121558  
C -0.25912327 0.79695041 -0.71835079  
C -1.89600293 -0.99913313 -0.73469198  
C -3.25254401 -1.48121560 -0.29641211  
C 1.02825119 0.11390243 -0.25908620  
C 2.37431128 -1.43423189 0.97329820  
H -0.17680695 0.73452297 -1.80274508  
H -2.72609749 0.60214316 1.40226774  
H -3.15038550 1.53653917 -0.03785978  
H 0.61485280 2.68209274 -0.01728151  
H -0.78792321 2.84912212 -1.07115205  
H -3.47763256 -2.41196497 -0.80615710  
H -4.02186860 -0.74120921 -0.51404380  
H -3.25469219 -1.65090140 0.78162871  
H 2.16240404 -2.33811809 1.53703013  
H 3.08878403 -0.82311297 1.52492815  
H 2.80559492 -1.70337649 0.01359756  
H -1.81228723 3.17045300 1.10129500  
H -0.78879842 1.94444335 1.83637686  
N 1.11621446 -0.71639548 0.77352337  
C 0.08121277 -0.99984878 1.76377513  
H 0.57710482 -1.17893023 2.71473524  
H -0.59089530 -0.16377724 1.89516228  
H -0.48493273 -1.89120458 1.48925283  
F 4.43455535 0.35580170 -0.56741741  
H 3.46278973 0.33154184 -0.68409166

1 4 1.0 7 1.0 8 1.5  
2 8 2.0  
3 10 2.0  
4 5 1.0 13 1.0 14 1.0  
5 6 1.0 23 1.0 24 1.0  
6 7 1.0 15 1.0 16 1.0  
7 10 1.0 12 1.0  
8 9 1.0  
9 17 1.0 18 1.0 19 1.0  
10 25 1.5  
11 20 1.0 21 1.0 22 1.0 25 1.0  
12  
13  
14  
15  
16  
17  
18  
19  
20  
21  
22  
23

24  
25 26 1.0  
26 27 1.0 28 1.0 29 1.0  
27  
28  
29  
30 31 1.0  
31

**Ac-Pro-NMe2-endo-alpha-thioureaacceptor**

optimized M062X/juncppVTZ/H2O

0 1  
N -2.58907226 -0.67635340 0.29448281  
O -2.33106357 0.57501818 2.13932624  
O 0.87994737 0.32390983 0.07512999  
C -3.37395318 -1.39514970 -0.71539314  
C -2.33537368 -1.75296566 -1.77762595  
C -1.03931092 -1.89885686 -0.98014505  
C -1.15660188 -0.83138922 0.12134410  
C -3.08096114 0.01044618 1.34564510  
C -4.58011411 0.06942982 1.46560979  
C -0.33182306 0.42202322 -0.17540044  
C 0.07304005 2.70087396 -0.74708025  
H -0.71561221 -1.18547900 1.05248832  
H -4.17519664 -0.76748657 -1.10446394  
H -3.82039864 -2.29115386 -0.28002404  
H -0.14188889 -1.77077727 -1.58023718  
H -0.99657859 -2.88019995 -0.50995344  
H -4.84054012 0.53627075 2.40953843  
H -5.01989027 -0.92538261 1.40665979  
H -4.99222000 0.66086185 0.64600892  
H 0.69632939 2.63532919 -1.64011990  
H 0.71492974 2.73231396 0.12889927  
H -0.51933679 3.60998767 -0.79081147  
H -2.60196393 -2.65952750 -2.31404322  
H -2.24246878 -0.95011501 -2.50882648  
N -0.83537403 1.55992517 -0.65845616  
C -2.19700303 1.79739067 -1.12712508  
H -2.14827241 2.53602986 -1.92352424  
H -2.64459852 0.90271169 -1.53821752  
H -2.82596489 2.18861782 -0.32548629  
C 4.16670789 -0.20977404 0.21371741  
N 3.28610068 -1.14125502 0.58784021  
H 3.62861640 -2.01748800 0.93772936  
H 2.28931321 -0.95791821 0.53513082  
N 3.65729278 0.94163967 -0.23210545  
H 4.28552953 1.66732363 -0.52526091  
H 2.65243688 1.07693776 -0.27374122  
S 5.84540207 -0.47450909 0.29993727

1 4 1.0 7 1.0 8 1.5  
2 8 2.0  
3 10 2.0  
4 5 1.0 13 1.0 14 1.0  
5 6 1.0 23 1.0 24 1.0  
6 7 1.0 15 1.0 16 1.0  
7 10 1.0 12 1.0  
8 9 1.0  
9 17 1.0 18 1.0 19 1.0  
10 25 1.5  
11 20 1.0 21 1.0 22 1.0 25 1.0  
12  
13  
14  
15

16  
 17  
 18  
 19  
 20  
 21  
 22  
 23  
 24  
 25 26 1.0  
 26 27 1.0 28 1.0 29 1.0  
 27  
 28  
 29  
 30 31 1.5 34 1.5 37 2.0  
 31 32 1.0 33 1.0  
 32  
 33  
 34 35 1.0 36 1.0  
 35  
 36  
 37

**Ac-Pro-NMe2-endo-alpha-ureaacceptor**

optimized M062X/juncppVTZ/H2O

0 1  
 N -2.26285100 -0.61418100 0.29875000  
 O -2.02362000 0.73741900 2.07354800  
 O 1.25007900 0.23766000 0.16804100  
 C -3.03740700 -1.35569300 -0.70266000  
 C -1.97348700 -1.81009100 -1.70070400  
 C -0.72034100 -1.96943300 -0.84008700  
 C -0.83222900 -0.83502700 0.19301900  
 C -2.76560300 0.15417900 1.28575200  
 C -4.26492500 0.27527900 1.34325200  
 C 0.05721800 0.36316900 -0.14544900  
 C 0.60795600 2.55886800 -0.86958700  
 H -0.44194700 -1.15120300 1.15944000  
 H -3.79632900 -0.71879900 -1.15608100  
 H -3.53714900 -2.20834300 -0.23916100  
 H 0.20693400 -1.92014200 -1.40527100  
 H -0.74808500 -2.92222700 -0.31330300  
 H -4.54011700 0.83531900 2.23056400  
 H -4.73655500 -0.70683500 1.36149500  
 H -4.62918000 0.79934500 0.45798400  
 H 1.35175700 2.31511200 -1.62904600  
 H 1.11796000 2.71899800 0.07790400  
 H 0.08804300 3.46759600 -1.15486800  
 H -2.25750300 -2.73055900 -2.20356200  
 H -1.81551300 -1.04874100 -2.46462900  
 N -0.37168800 1.48201200 -0.73738300  
 C -1.71392200 1.75771800 -1.23975200  
 H -1.62295200 2.45218600 -2.07072200  
 H -2.19391400 0.86337100 -1.61351700  
 H -2.33841100 2.21436800 -0.46956800  
 C 4.58087800 -0.37060400 0.32731000  
 N 3.66125000 -1.26904600 0.77258500  
 H 3.96635400 -2.22173500 0.86174200  
 H 2.67508600 -1.07214100 0.66398300  
 N 4.08509300 0.86548000 0.04391100  
 H 4.70469900 1.50119500 -0.42618100  
 H 3.08549100 0.98812900 -0.05425400  
 O 5.77977500 -0.63944700 0.23784300

1 4 1.0 7 1.0 8 1.5

2 8 2.0  
 3 10 2.0  
 4 5 1.0 13 1.0 14 1.0  
 5 6 1.0 23 1.0 24 1.0  
 6 7 1.0 15 1.0 16 1.0  
 7 10 1.0 12 1.0  
 8 9 1.0  
 9 17 1.0 18 1.0 19 1.0  
 10 25 1.5  
 11 20 1.0 21 1.0 22 1.0 25 1.0  
 12  
 13  
 14  
 15  
 16  
 17  
 18  
 19  
 20  
 21  
 22  
 23  
 24  
 25 26 1.0  
 26 27 1.0 28 1.0 29 1.0  
 27  
 28  
 29  
 30 31 1.5 34 1.5 37 2.0  
 31 32 1.0 33 1.0  
 32  
 33  
 34 35 1.0 36 1.0  
 35  
 36  
 37

**Ac-Pro-NMe2-endo-PPII-2H2Oacceptor3H2O**

5 H2O optimized M062X/junccpVTZ/H2O

0 1  
 N -1.21828300 -1.54003200 -0.00507400  
 O 0.19052200 -1.36945000 -1.73521100  
 O -0.07396500 0.83577200 0.65398100  
 C -1.75498000 -2.14715900 1.21721300  
 C -2.59412500 -1.01913800 1.80990200  
 C -3.10535400 -0.27430800 0.57510900  
 C -1.90182300 -0.31519800 -0.38477900  
 C -0.21565300 -2.01246300 -0.76069300  
 C 0.36872000 -3.33913300 -0.36569100  
 C -0.99100000 0.89282600 -0.18268100  
 C -0.31922200 3.12889500 -0.75114400  
 H -2.19519100 -0.38091300 -1.42920000  
 H -0.94773500 -2.46414500 1.87476600  
 H -2.36852800 -3.01619300 0.97052000  
 H -3.43105200 0.74082300 0.79244600  
 H -3.93662900 -0.81189900 0.12020600  
 H 1.07224300 -3.65543800 -1.12827800  
 H -0.41521800 -4.08529100 -0.23965000  
 H 0.89337300 -3.23637200 0.58490900  
 H -0.36292500 3.71644500 -1.66454000  
 H 0.69698800 2.77349100 -0.60092200  
 H -0.61017300 3.75492200 0.09327400  
 H -3.39779800 -1.39016200 2.44007000  
 H -1.95886100 -0.36395900 2.40521200  
 N -1.22212900 1.99281400 -0.89347800



|   |             |             |             |
|---|-------------|-------------|-------------|
| C | -2.36040500 | 2.18703700  | -1.78253800 |
| H | -2.04769600 | 2.12008600  | -2.82480300 |
| H | -3.14319300 | 1.46219900  | -1.59159000 |
| H | -2.77248800 | 3.17836700  | -1.60216400 |
| H | 1.05781700  | -0.54304500 | 1.14359500  |
| O | 1.88190200  | -0.99548400 | 1.39470600  |
| H | 2.53002900  | -0.27384400 | 1.37390400  |
| O | 2.24096900  | 0.56528900  | -1.72017400 |
| H | 1.44201100  | 0.02064100  | -1.63017000 |
| H | 2.43919300  | 0.90957900  | -0.83493500 |
| O | 3.21887000  | 1.45603100  | 0.83313400  |
| H | 4.10592500  | 1.82457700  | 0.85680600  |
| H | 2.64952900  | 2.03354200  | 1.38154500  |
| O | 1.21348900  | 2.71548100  | 2.17468100  |
| H | 1.11982100  | 2.50411500  | 3.10775500  |
| H | 0.61832300  | 2.10470100  | 1.69695900  |
| O | 3.47444300  | -1.92220400 | -0.82968800 |
| H | 2.87789300  | -1.84000800 | -0.06989700 |
| H | 3.24043200  | -1.14333400 | -1.35556600 |

1 4 1.0 7 1.0 8 1.5  
2 8 2.0  
3 10 2.0  
4 5 1.0 13 1.0 14 1.0  
5 6 1.0 23 1.0 24 1.0  
6 7 1.0 15 1.0 16 1.0  
7 10 1.0 12 1.0  
8 9 1.0  
9 17 1.0 18 1.0 19 1.0  
10 25 1.5  
11 20 1.0 21 1.0 22 1.0 25 1.0  
12  
13  
14  
15  
16  
17  
18  
19  
20  
21  
22  
23  
24  
25 26 1.0  
26 27 1.0 28 1.0 29 1.0  
27  
28  
29  
30 31 1.0  
31 32 1.0  
32  
33 34 1.0 35 1.0  
34  
35  
36 37 1.0 38 1.0  
37  
38  
39 40 1.0 41 1.0  
40  
41  
42 43 1.0 44 1.0  
43  
44

### Ac-Pro-NMe2-endo-PPII-guanidinium

optimized M062X/juncppVTZ/H2O

1 1 0 1 1 1

|               |             |             |             |
|---------------|-------------|-------------|-------------|
| N(Fragment=1) | 0.50962700  | 1.55901600  | 0.25073500  |
| O(Fragment=1) | 1.51527300  | 1.83003500  | -1.73594100 |
| O(Fragment=1) | 0.06903500  | -0.97464700 | -0.69306700 |
| C(Fragment=1) | -0.42345900 | 1.91487500  | 1.32360300  |
| C(Fragment=1) | -0.34509700 | 0.70071000  | 2.24137800  |
| C(Fragment=1) | 1.11777400  | 0.26965300  | 2.11797600  |
| C(Fragment=1) | 1.43168800  | 0.50127600  | 0.62698000  |
| C(Fragment=1) | 0.66865900  | 2.19964500  | -0.92543100 |
| C(Fragment=1) | -0.23632800 | 3.37650300  | -1.17879800 |
| C(Fragment=1) | 1.18188300  | -0.76577400 | -0.18853600 |
| C(Fragment=1) | 2.04087400  | -2.85306500 | -1.06964200 |
| H(Fragment=1) | 2.45191700  | 0.83982400  | 0.46274900  |
| H(Fragment=1) | -1.42472200 | 2.08262900  | 0.93248300  |
| H(Fragment=1) | -0.09094600 | 2.82180900  | 1.83448300  |
| H(Fragment=1) | 1.28671000  | -0.76057000 | 2.42471600  |
| H(Fragment=1) | 1.75572900  | 0.91547700  | 2.72035600  |
| H(Fragment=1) | 0.03676700  | 3.83309100  | -2.12411700 |
| H(Fragment=1) | -0.14702000 | 4.10742500  | -0.37511600 |
| H(Fragment=1) | -1.27880200 | 3.06084900  | -1.21852000 |
| H(Fragment=1) | 2.87090900  | -2.92564900 | -1.77151400 |
| H(Fragment=1) | 1.10481400  | -2.82140500 | -1.61414900 |
| H(Fragment=1) | 2.05541000  | -3.72522200 | -0.41588000 |
| H(Fragment=1) | -0.63248200 | 0.93302400  | 3.26324500  |
| H(Fragment=1) | -1.00204800 | -0.08504900 | 1.86489400  |
| N(Fragment=1) | 2.18764200  | -1.63616500 | -0.28399600 |
| C(Fragment=1) | 3.49558300  | -1.43032300 | 0.32992100  |
| H(Fragment=1) | 4.13961400  | -0.82295100 | -0.30730700 |
| H(Fragment=1) | 3.40798200  | -0.96463700 | 1.30709000  |
| H(Fragment=1) | 3.95816600  | -2.40435100 | 0.46678800  |
| C(Fragment=2) | -3.14594300 | -1.02502400 | -0.22438600 |
| N(Fragment=2) | -2.53182400 | 0.04279700  | -0.71816400 |
| H(Fragment=2) | -3.06488100 | 0.81032500  | -1.08837700 |
| H(Fragment=2) | -1.51934900 | 0.00816700  | -0.83097100 |
| N(Fragment=2) | -2.42125000 | -2.07798800 | 0.13211800  |
| H(Fragment=2) | -2.85341400 | -2.89705400 | 0.52250000  |
| H(Fragment=2) | -1.42455700 | -2.06771000 | -0.05183800 |
| N(Fragment=1) | -4.46682500 | -1.03605300 | -0.07626800 |
| H(Fragment=1) | -4.94040800 | -1.84594400 | 0.28419300  |
| H(Fragment=1) | -5.01926200 | -0.22728200 | -0.30300800 |

1 4 1.0 7 1.0 8 1.5

2 8 2.0

3 10 2.0

4 5 1.0 13 1.0 14 1.0

5 6 1.0 23 1.0 24 1.0

6 7 1.0 15 1.0 16 1.0

7 10 1.0 12 1.0

8 9 1.0

9 17 1.0 18 1.0 19 1.0

10 25 1.5

11 20 1.0 21 1.0 22 1.0 25 1.0

12

13

14

15

16

17

18

19

20

21

22

23  
24  
25 26 1.0  
26 27 1.0 28 1.0 29 1.0  
27  
28  
29  
30 31 1.5 34 1.5 37 1.5  
31 32 1.0 33 1.0  
32  
33  
34 35 1.0 36 1.0  
35  
36  
37 38 1.0 39 1.0  
38  
39

**Ac-Pro-NMe2-endo-PPII-H2OcisHFtrans**

M062X/junccpVTZ/H2O optimized

0 1  
N 1.39959570 -0.64035340 -0.12436034  
O 1.04231610 -0.21841143 -2.29855841  
O -0.75890537 0.98111179 0.11760890  
C 2.19473275 -0.66607102 1.10801383  
C 1.14047297 -0.95110377 2.17131553  
C 0.15313407 -1.86394229 1.44272938  
C 0.09543663 -1.25788091 0.02676307  
C 1.79774290 -0.18279860 -1.32906767  
C 3.19398142 0.37272283 -1.40479193  
C -1.01990693 -0.22295963 -0.08526949  
C -3.30734530 0.36457878 -0.50399329  
H -0.04169930 -2.00860883 -0.74772040  
H 2.69852304 0.28552083 1.25743991  
H 2.93890675 -1.46496913 1.06261825  
H -0.82382769 -1.90906330 1.91929239  
H 0.54976040 -2.87642427 1.37463503  
H 3.42675013 0.60175361 -2.43955992  
H 3.91798585 -0.33962679 -1.01016742  
H 3.25163119 1.28084786 -0.80377443  
H -4.15843004 -0.10867159 -0.98394464  
H -2.96339912 1.19151380 -1.12016817  
H -3.61010560 0.74889907 0.47012152  
H 1.56116692 -1.40964972 3.06210403  
H 0.65023829 -0.01937085 2.45672084  
N -2.24904163 -0.63128688 -0.36331467  
C -2.65564072 -2.02546446 -0.49879913  
H -2.87551737 -2.25351932 -1.54139386  
H -1.89202810 -2.70119729 -0.13377422  
H -3.55489411 -2.18148829 0.09446204  
H 0.84173375 1.85135590 0.48904484  
O 1.57679368 2.44501621 0.71585007  
H 1.16117773 3.28917441 0.91107887  
F -1.99853062 3.07159277 0.54432806  
H -1.58235756 2.21645271 0.35715147

1 4 1.0 7 1.0 8 1.5  
2 8 2.0  
3 10 2.0  
4 5 1.0 13 1.0 14 1.0  
5 6 1.0 23 1.0 24 1.0  
6 7 1.0 15 1.0 16 1.0  
7 10 1.0 12 1.0  
8 9 1.0  
9 17 1.0 18 1.0 19 1.0

10 25 1.5  
11 20 1.0 21 1.0 22 1.0 25 1.0  
12  
13  
14  
15  
16  
17  
18  
19  
20  
21  
22  
23  
24  
25 26 1.0  
26 27 1.0 28 1.0 29 1.0  
27  
28  
29  
30 31 1.0  
31 32 1.0  
32  
33 34 1.0  
34

**Ac-Pro-NMe2-endo-PPII-H2Ocis**

M062X/junccpVTZ/H2O optimized

0 1  
N -1.11427300 0.36524160 -0.54173225  
O -0.80693131 -1.54685668 -1.67682660  
O 0.62938326 -0.86001751 1.17177848  
C -1.91565124 1.36861662 0.16577951  
C -0.85382397 2.18106059 0.89739849  
C 0.33391017 2.14708951 -0.06600616  
C 0.29352299 0.71037768 -0.61981397  
C -1.57203947 -0.76496552 -1.11273039  
C -3.05351974 -1.01178913 -1.01233779  
C 1.13913541 -0.23286262 0.23981213  
C 3.29493502 -1.21842821 0.72195680  
H 0.62266740 0.64723040 -1.65411169  
H -2.61681749 0.88839162 0.84335983  
H -2.46731730 1.98590671 -0.54773730  
H 1.28146950 2.38064797 0.41497767  
H 0.18094453 2.85043244 -0.88431620  
H -3.30927139 -1.87863665 -1.61289272  
H -3.61847224 -0.14439578 -1.35275394  
H -3.31290967 -1.19545388 0.03085835  
H 4.00999364 -1.68021032 0.04279834  
H 2.68609753 -1.98488767 1.18770005  
H 3.84406854 -0.67468549 1.49266393  
H -1.18485940 3.19076079 1.12563534  
H -0.59323821 1.67820001 1.82929699  
N 2.44722806 -0.31450545 -0.04012973  
C 3.14060534 0.47703333 -1.04544474  
H 3.37248844 -0.12948246 -1.92214168  
H 2.56209336 1.34154304 -1.34974562  
H 4.07486191 0.83768124 -0.61626309  
H -1.04818685 -0.96365040 1.76588121  
O -1.93201150 -1.07612376 2.16705427  
H -1.78026839 -1.57735460 2.97209201

1 4 1.0 7 1.0 8 1.5  
2 8 2.0  
3 10 2.0

4 5 1.0 13 1.0 14 1.0  
 5 6 1.0 23 1.0 24 1.0  
 6 7 1.0 15 1.0 16 1.0  
 7 10 1.0 12 1.0  
 8 9 1.0  
 9 17 1.0 18 1.0 19 1.0  
 10 25 1.5  
 11 20 1.0 21 1.0 22 1.0 25 1.0  
 12  
 13  
 14  
 15  
 16  
 17  
 18  
 19  
 20  
 21  
 22  
 23  
 24  
 25 26 1.0  
 26 27 1.0 28 1.0 29 1.0  
 27  
 28  
 29  
 30 31 1.0  
 31 32 1.0  
 32

**Ac-Pro-NMe2-endo-PPII-HFcis**

M062X/juncppVTZ/H2O optimized

|     |             |             |             |
|-----|-------------|-------------|-------------|
| 0 1 |             |             |             |
| N   | -1.15920472 | 0.31227338  | -0.53183760 |
| O   | -0.82066168 | -1.69262763 | -1.47974551 |
| O   | 0.66073821  | -0.75933105 | 1.23163492  |
| C   | -1.96404676 | 1.34954317  | 0.12065055  |
| C   | -0.90277184 | 2.23029578  | 0.76905113  |
| C   | 0.26353270  | 2.14942064  | -0.21704020 |
| C   | 0.23845409  | 0.67654162  | -0.66819186 |
| C   | -1.59678739 | -0.88331568 | -0.97417544 |
| C   | -3.06431709 | -1.16483111 | -0.79979849 |
| C   | 1.12294105  | -0.18863980 | 0.22679002  |
| C   | 3.26952669  | -1.13391178 | 0.75336475  |
| H   | 0.54860239  | 0.54600396  | -1.70217502 |
| H   | -2.64241702 | 0.90675538  | 0.84475875  |
| H   | -2.54183742 | 1.90434382  | -0.62246080 |
| H   | 1.21689844  | 2.43624585  | 0.22155907  |
| H   | 0.07673644  | 2.78636466  | -1.08125990 |
| H   | -3.30847163 | -2.09350137 | -1.30492470 |
| H   | -3.66983792 | -0.35270759 | -1.20077516 |
| H   | -3.28479516 | -1.25536830 | 0.26431880  |
| H   | 4.11980899  | -1.44842488 | 0.15387069  |
| H   | 2.71500721  | -2.00528670 | 1.08592091  |
| H   | 3.62885752  | -0.58477680 | 1.62446153  |
| H   | -1.24833091 | 3.24764169  | 0.93171673  |
| H   | -0.61240907 | 1.80188014  | 1.72915885  |
| N   | 2.41432106  | -0.28896357 | -0.07250036 |
| C   | 3.08186978  | 0.43782016  | -1.14535977 |
| H   | 3.29169427  | -0.22613206 | -1.98413696 |
| H   | 2.49026326  | 1.27852949  | -1.48807871 |
| H   | 4.02298041  | 0.82734526  | -0.76124936 |
| F   | -1.58764993 | -0.92593827 | 2.15448737  |
| H   | -0.71073446 | -0.82050539 | 1.72241527  |

1 4 1.0 7 1.0 8 1.5  
 2 8 2.0  
 3 10 2.0  
 4 5 1.0 13 1.0 14 1.0  
 5 6 1.0 23 1.0 24 1.0  
 6 7 1.0 15 1.0 16 1.0  
 7 10 1.0 12 1.0  
 8 9 1.0  
 9 17 1.0 18 1.0 19 1.0  
 10 25 1.5  
 11 20 1.0 21 1.0 22 1.0 25 1.0  
 12  
 13  
 14  
 15  
 16  
 17  
 18  
 19  
 20  
 21  
 22  
 23  
 24  
 25 26 1.0  
 26 27 1.0 28 1.0 29 1.0  
 27  
 28  
 29  
 30 31 1.0  
 31

**Ac-Pro-NMe2-endo-PPII-HFdonor-HFHAcceptor**

M062X/juncppVTZ/H2O optimized

|     |             |             |             |
|-----|-------------|-------------|-------------|
| 0 1 |             |             |             |
| N   | -1.12161259 | 0.87232532  | -0.43853712 |
| O   | -1.50187327 | -1.29664864 | -0.76978304 |
| O   | 0.94695221  | -0.22301709 | 0.97422935  |
| C   | -1.43483595 | 2.22664799  | 0.03738236  |
| C   | -0.06329005 | 2.88954697  | 0.05594695  |
| C   | 0.65129230  | 2.24713851  | -1.13422311 |
| C   | 0.18155106  | 0.77988715  | -1.07966288 |
| C   | -1.91013084 | -0.19613500 | -0.34796800 |
| C   | -3.25966708 | -0.02109952 | 0.27738233  |
| C   | 1.13542669  | -0.08020770 | -0.26101942 |
| C   | 3.05068102  | -1.51839400 | -0.10183524 |
| H   | 0.06465278  | 0.33634479  | -2.06478846 |
| H   | -1.90081267 | 2.18350119  | 1.01789120  |
| H   | -2.10954908 | 2.71938560  | -0.66491020 |
| H   | 1.73389691  | 2.33945205  | -1.08524602 |
| H   | 0.30923532  | 2.68776317  | -2.06965099 |
| H   | -3.83367991 | -0.93523770 | 0.16505616  |
| H   | -3.78957878 | 0.81158906  | -0.18278849 |
| H   | -3.13059043 | 0.20258372  | 1.33671226  |
| H   | 3.60619871  | -2.12917840 | -0.80645637 |
| H   | 2.46332068  | -2.16281818 | 0.54654979  |
| H   | 3.74668683  | -0.93676474 | 0.50175576  |
| H   | -0.12574036 | 3.97089114  | -0.02633762 |
| H   | 0.45160201  | 2.63946917  | 0.98403369  |
| N   | 2.16628211  | -0.63744047 | -0.86266641 |
| C   | 2.51632766  | -0.42709971 | -2.26563064 |
| H   | 2.20384533  | -1.28195722 | -2.86436600 |
| H   | 2.06928037  | 0.47924850  | -2.65661059 |
| H   | 3.59662961  | -0.32250504 | -2.33070911 |
| F   | 2.43917433  | -0.81851253 | 2.91007072  |

|   |             |             |             |
|---|-------------|-------------|-------------|
| H | 1.91960508  | -0.61909998 | 2.13022339  |
| F | -0.90221028 | 0.43647886  | 2.50767393  |
| H | -0.22688975 | 0.21269968  | 1.85690622  |
| F | -2.95416508 | -3.24376962 | -0.60956403 |
| H | -2.37075027 | -2.45171350 | -0.67027006 |

1 4 1.0 7 1.0 8 1.5  
 2 8 2.0  
 3 10 2.0  
 4 5 1.0 13 1.0 14 1.0  
 5 6 1.0 23 1.0 24 1.0  
 6 7 1.0 15 1.0 16 1.0  
 7 10 1.0 12 1.0  
 8 9 1.0  
 9 17 1.0 18 1.0 19 1.0  
 10 25 1.5  
 11 20 1.0 21 1.0 22 1.0 25 1.0  
 12  
 13  
 14  
 15  
 16  
 17  
 18  
 19  
 20  
 21  
 22  
 23  
 24  
 25 26 1.0  
 26 27 1.0 28 1.0 29 1.0  
 27  
 28  
 29  
 30 31 1.0  
 31  
 32 33 1.0  
 33  
 34 35 1.0  
 35

**Ac-Pro-NMe2-endo-PPII-HFdonor**

M062X/juncppVTZ/H2O optimized

|     |             |             |             |
|-----|-------------|-------------|-------------|
| 0 1 |             |             |             |
| N   | -0.83543153 | 0.93848584  | -0.18021140 |
| O   | -1.63522457 | -1.12806655 | -0.44669720 |
| O   | 0.77049642  | -0.29819062 | 1.58076374  |
| C   | -0.89580746 | 2.33987933  | 0.25632162  |
| C   | 0.57017558  | 2.76567329  | 0.25367017  |
| C   | 1.19431239  | 1.89351800  | -0.83669704 |
| C   | 0.48573950  | 0.54377618  | -0.64533210 |
| C   | -1.82247635 | 0.05714011  | -0.09671055 |
| C   | -3.14438117 | 0.53124237  | 0.43007187  |
| C   | 1.18308161  | -0.30790121 | 0.42599329  |
| C   | 2.97665579  | -1.83552318 | 0.99910603  |
| H   | 0.38228717  | -0.02197036 | -1.56691964 |
| H   | -1.35439794 | 2.41672560  | 1.23976207  |
| H   | -1.48473347 | 2.92311922  | -0.45353499 |
| H   | 2.27517160  | 1.81175791  | -0.74764847 |
| H   | 0.95665109  | 2.28470469  | -1.82562959 |
| H   | -3.89825147 | -0.23150140 | 0.26335038  |
| H   | -3.44316621 | 1.46197762  | -0.04891413 |
| H   | -3.05774723 | 0.71971739  | 1.50100785  |
| H   | 3.10662187  | -2.83686883 | 0.58776718  |

|   |             |             |             |
|---|-------------|-------------|-------------|
| H | 2.41016120  | -1.88913610 | 1.92119284  |
| H | 3.96232559  | -1.41187975 | 1.19956312  |
| H | 0.68601384  | 3.82869362  | 0.06165983  |
| H | 1.02191790  | 2.53577496  | 1.21770149  |
| N | 2.26296788  | -1.01227587 | 0.03743410  |
| C | 2.83614622  | -1.01779199 | -1.29801282 |
| H | 2.70993551  | -1.99853777 | -1.75943197 |
| H | 2.38823104  | -0.26731007 | -1.93775830 |
| H | 3.90345609  | -0.80508109 | -1.22606931 |
| F | -3.46844291 | -2.70678042 | -0.33910298 |
| H | -2.72409637 | -2.05265168 | -0.37772570 |

1 4 1.0 7 1.0 8 1.5  
 2 8 2.0  
 3 10 2.0  
 4 5 1.0 13 1.0 14 1.0  
 5 6 1.0 23 1.0 24 1.0  
 6 7 1.0 15 1.0 16 1.0  
 7 10 1.0 12 1.0  
 8 9 1.0  
 9 17 1.0 18 1.0 19 1.0  
 10 25 1.5  
 11 20 1.0 21 1.0 22 1.0 25 1.0  
 12  
 13  
 14  
 15  
 16  
 17  
 18  
 19  
 20  
 21  
 22  
 23  
 24  
 25 26 1.0  
 26 27 1.0 28 1.0 29 1.0  
 27  
 28  
 29  
 30 31 1.0  
 31

### Ac-Pro-NMe2-endo-PPII-HFHAcceptor

M062X/juncppVTZ/H2O optimized

|     |             |             |             |
|-----|-------------|-------------|-------------|
| 0 1 |             |             |             |
| N   | 1.46559277  | -0.54772344 | -0.10225789 |
| O   | 1.04822545  | -0.12827675 | -2.26401511 |
| O   | -0.79916253 | 0.97236468  | 0.12818550  |
| C   | 2.26302289  | -0.51293748 | 1.12794318  |
| C   | 1.22211612  | -0.81541083 | 2.19977169  |
| C   | 0.27298163  | -1.78611697 | 1.49597942  |
| C   | 0.19380359  | -1.22395228 | 0.06238606  |
| C   | 1.81996123  | -0.06072310 | -1.30971021 |
| C   | 3.18271093  | 0.56805842  | -1.40430759 |
| C   | -0.97153241 | -0.25499893 | -0.08669505 |
| C   | -3.26777734 | 0.20001615  | -0.62158227 |
| H   | 0.09337485  | -2.00241367 | -0.68999875 |
| H   | 2.72777397  | 0.46150178  | 1.25355956  |
| H   | 3.03934361  | -1.28113826 | 1.09893551  |
| H   | -0.70226332 | -1.85665203 | 1.97274263  |
| H   | 0.70906183  | -2.78349396 | 1.45470286  |
| H   | 3.39433319  | 0.79900244  | -2.44308232 |
| H   | 3.94763270  | -0.09859462 | -1.00760628 |



|   |             |             |             |
|---|-------------|-------------|-------------|
| H | 3.19690755  | 1.48493567  | -0.81442642 |
| H | -4.04085162 | -0.31747926 | -1.18092124 |
| H | -2.92812015 | 1.06059976  | -1.19167469 |
| H | -3.67542899 | 0.53855227  | 0.33053286  |
| H | 1.66102746  | -1.23502243 | 3.10080936  |
| H | 0.69394877  | 0.10150160  | 2.46453236  |
| N | -2.15902255 | -0.72809303 | -0.40954260 |
| C | -2.46544181 | -2.14902161 | -0.55826219 |
| H | -2.48710278 | -2.42419153 | -1.61235904 |
| H | -1.74734881 | -2.76705776 | -0.03248566 |
| H | -3.44527072 | -2.32903879 | -0.12269844 |
| F | -2.30755321 | 2.88730671  | 0.71618723  |
| H | -1.78878442 | 2.11797406  | 0.47043317  |
| F | 1.22040747  | 2.35441283  | 0.59325817  |
| H | 0.49851487  | 1.74407048  | 0.40009795  |

1 4 1.0 7 1.0 8 1.5  
 2 8 2.0  
 3 10 2.0  
 4 5 1.0 13 1.0 14 1.0  
 5 6 1.0 23 1.0 24 1.0  
 6 7 1.0 15 1.0 16 1.0  
 7 10 1.0 12 1.0  
 8 9 1.0  
 9 17 1.0 18 1.0 19 1.0  
 10 25 1.5  
 11 20 1.0 21 1.0 22 1.0 25 1.0  
 12  
 13  
 14  
 15  
 16  
 17  
 18  
 19  
 20  
 21  
 22  
 23  
 24  
 25 26 1.0  
 26 27 1.0 28 1.0 29 1.0  
 27  
 28  
 29  
 30 31 1.0  
 31  
 32 33 1.0  
 33

**Ac-Pro-NMe2-endo-PPII-HFHfdonor-HFHfacceptor**

M062X/juncppVTZ/H2O optimized

|     |             |             |             |
|-----|-------------|-------------|-------------|
| 0 1 |             |             |             |
| N   | -1.03903123 | 1.07183094  | -0.36248591 |
| O   | -1.55331060 | -1.06654826 | -0.82361172 |
| O   | 0.79804848  | -0.20065375 | 1.15959850  |
| C   | -1.35423201 | 2.42744159  | 0.12826686  |
| C   | 0.01911934  | 3.07830397  | 0.20928081  |
| C   | 0.77426920  | 2.43868577  | -0.95487661 |
| C   | 0.31641523  | 0.96964896  | -0.89481523 |
| C   | -1.89312434 | 0.06337991  | -0.38370350 |
| C   | -3.27414757 | 0.29629351  | 0.13917856  |
| C   | 1.21162810  | 0.13716991  | 0.02199467  |
| C   | 3.27359335  | -0.98568698 | 0.48340779  |
| H   | 0.28139854  | 0.49793592  | -1.87456655 |

|   |             |             |             |
|---|-------------|-------------|-------------|
| H | -1.86033421 | 2.36973178  | 1.08730481  |
| H | -1.99501461 | 2.93322536  | -0.59506932 |
| H | 1.85322912  | 2.54034339  | -0.87489732 |
| H | 0.45259880  | 2.86756751  | -1.90290802 |
| H | -3.89654574 | -0.56691807 | -0.07171594 |
| H | -3.70797361 | 1.18721746  | -0.31175600 |
| H | -3.21797209 | 0.45497398  | 1.21667093  |
| H | 4.28667595  | -0.94746214 | 0.09639728  |
| H | 2.92974350  | -2.02034505 | 0.49829067  |
| H | 3.25766750  | -0.58547317 | 1.49328101  |
| H | -0.03536454 | 4.16015222  | 0.13236516  |
| H | 0.49556325  | 2.82120041  | 1.15636765  |
| N | 2.42063003  | -0.18162677 | -0.38870291 |
| C | 2.91776172  | 0.02072893  | -1.74503188 |
| H | 2.97972264  | -0.94409232 | -2.24746193 |
| H | 2.27454805  | 0.67708291  | -2.31684946 |
| H | 3.90822690  | 0.46724021  | -1.69060185 |
| F | 1.37464442  | -2.04021464 | 2.79055479  |
| H | 1.21699179  | -1.35866030 | 2.13940640  |
| F | -1.09344647 | 0.58734800  | 2.58256417  |
| H | -0.38842255 | 0.32070955  | 1.98364012  |
| F | -3.23143515 | -2.90510655 | -0.87577954 |
| H | -2.58352084 | -2.18884839 | -0.85056561 |
| F | 0.55263374  | -2.06323719 | -1.73448412 |
| H | -0.24957945 | -1.66429428 | -1.38481098 |

1 4 1.0 7 1.0 8 1.5  
2 8 2.0  
3 10 2.0  
4 5 1.0 13 1.0 14 1.0  
5 6 1.0 23 1.0 24 1.0  
6 7 1.0 15 1.0 16 1.0  
7 10 1.0 12 1.0  
8 9 1.0  
9 17 1.0 18 1.0 19 1.0  
10 25 1.5  
11 20 1.0 21 1.0 22 1.0 25 1.0  
12  
13  
14  
15  
16  
17  
18  
19  
20  
21  
22  
23  
24  
25 26 1.0  
26 27 1.0 28 1.0 29 1.0  
27  
28  
29  
30 31 1.0  
31  
32 33 1.0  
33  
34 35 1.0  
35  
36 37 1.0  
37

**Ac-Pro-NMe2-endo-PPII-HFHFdonor**

M062X/juncppVTZ/H2O optimized

|     |             |             |             |
|-----|-------------|-------------|-------------|
| 0 1 |             |             |             |
| N   | -0.80745135 | 1.11761616  | -0.19056901 |
| O   | -1.74610016 | -0.92328740 | -0.28549572 |
| O   | 0.70427527  | -0.10681750 | 1.63436610  |
| C   | -0.81692910 | 2.55533116  | 0.13403472  |
| C   | 0.65848102  | 2.93529508  | 0.07065919  |
| C   | 1.22853522  | 1.96663511  | -0.96493102 |
| C   | 0.50451908  | 0.65336884  | -0.63243330 |
| C   | -1.83494839 | 0.31074224  | -0.03376127 |
| C   | -3.12663750 | 0.88768846  | 0.45461342  |
| C   | 1.19868948  | -0.10452464 | 0.51270421  |
| C   | 3.01897413  | -1.47529661 | 1.27164763  |
| H   | 0.38457741  | 0.00186737  | -1.49497236 |
| H   | -1.25693032 | 2.72059369  | 1.11442201  |
| H   | -1.40163000 | 3.09147217  | -0.61434977 |
| H   | 2.30919010  | 1.86964705  | -0.90526932 |
| H   | 0.96003752  | 2.27868297  | -1.97379357 |
| H   | -3.92165462 | 0.15937717  | 0.33302515  |
| H   | -3.37283744 | 1.80132425  | -0.08249108 |
| H   | -3.02833167 | 1.13611670  | 1.51237660  |
| H   | 4.08803301  | -1.50532174 | 1.07361251  |
| H   | 2.63194147  | -2.49732771 | 1.28549025  |
| H   | 2.83926358  | -1.01564682 | 2.23744587  |
| H   | 0.79804387  | 3.97727079  | -0.20226212 |
| H   | 1.12705093  | 2.76458434  | 1.03950866  |
| N   | 2.37226260  | -0.69653638 | 0.22799179  |
| C   | 2.87205893  | -0.93493353 | -1.11629295 |
| H   | 2.64912353  | -1.95782454 | -1.42538624 |
| H   | 2.43821367  | -0.25007058 | -1.83540620 |
| H   | 3.95125626  | -0.78929980 | -1.12203198 |
| F   | -3.73592790 | -2.37145126 | -0.01472915 |
| H   | -2.96072479 | -1.79717057 | -0.11759520 |
| F   | 0.12532795  | -2.47481428 | -0.81287264 |
| H   | -0.57475970 | -1.84444089 | -0.60427325 |

1 4 1.0 7 1.0 8 1.5  
2 8 2.0  
3 10 2.0  
4 5 1.0 13 1.0 14 1.0  
5 6 1.0 23 1.0 24 1.0  
6 7 1.0 15 1.0 16 1.0  
7 10 1.0 12 1.0  
8 9 1.0  
9 17 1.0 18 1.0 19 1.0  
10 25 1.5  
11 20 1.0 21 1.0 22 1.0 25 1.0  
12  
13  
14  
15  
16  
17  
18  
19  
20  
21  
22  
23  
24  
25 26 1.0  
26 27 1.0 28 1.0 29 1.0  
27  
28  
29  
30 31 1.0  
31

32 33 1.0  
33

**Ac-Pro-NMe2-endo-PPII-HFtrans**

M062X/junccpVTZ/H2O optimized

0 1  
N 1.58401009 -0.22363546 -0.10706789  
O 1.28578520 0.94406492 -2.00075020  
O -0.73544342 0.97177311 0.53262272  
C 2.25204158 -0.54142891 1.15911429  
C 1.21135853 -1.38099192 1.89634615  
C 0.44794822 -2.07201452 0.76557516  
C 0.36432702 -0.97818420 -0.31248671  
C 1.95825683 0.71491835 -0.99662566  
C 3.22846257 1.46285770 -0.68950660  
C -0.86177987 -0.08876256 -0.10416586  
C -3.20063222 0.36270709 -0.40440678  
H 0.35122574 -1.37651069 -1.32362696  
H 2.51374310 0.36608673 1.69954196  
H 3.16460766 -1.11128293 0.97147165  
H -0.52986335 -2.43717094 1.07191034  
H 1.02118644 -2.91069513 0.37143322  
H 3.51509658 2.04223319 -1.56096319  
H 4.03312579 0.78340030 -0.41216668  
H 3.06039619 2.13879331 0.15012773  
H -3.98606273 0.01328260 -1.06805735  
H -2.95366419 1.39204023 -0.65197745  
H -3.55545175 0.32322949 0.62574133  
H 1.66472260 -2.08395278 2.58991214  
H 0.54038464 -0.72838808 2.45403206  
N -2.03299290 -0.49234211 -0.58691400  
C -2.27915441 -1.77718226 -1.22900985  
H -2.57285321 -1.62330099 -2.26694439  
H -1.40488627 -2.41526689 -1.19744586  
H -3.08893645 -2.28410125 -0.70532726  
F -2.23032847 2.60614549 1.57920481  
H -1.68463858 1.92992065 1.13338368

1 4 1.0 7 1.0 8 1.5  
2 8 2.0  
3 10 2.0  
4 5 1.0 13 1.0 14 1.0  
5 6 1.0 23 1.0 24 1.0  
6 7 1.0 15 1.0 16 1.0  
7 10 1.0 12 1.0  
8 9 1.0  
9 17 1.0 18 1.0 19 1.0  
10 25 1.5  
11 20 1.0 21 1.0 22 1.0 25 1.0  
12  
13  
14  
15  
16  
17  
18  
19  
20  
21  
22  
23  
24  
25 26 1.0  
26 27 1.0 28 1.0 29 1.0  
27

28  
29  
30 31 1.0  
31

**Ac-Pro-NMe2-endo-PPII-thioureaacceptor**

M062X/juncppVTZ/H2O optimized

0 1 0 1 0 1

|               |             |             |             |
|---------------|-------------|-------------|-------------|
| N(Fragment=1) | 0.84231840  | 1.53280005  | 0.29123309  |
| O(Fragment=1) | 1.96695008  | 1.79730744  | -1.63218055 |
| O(Fragment=1) | 0.34849704  | -0.95735327 | -0.74547454 |
| C(Fragment=1) | -0.15143472 | 1.89505325  | 1.30506494  |
| C(Fragment=1) | -0.19149013 | 0.65097719  | 2.18417291  |
| C(Fragment=1) | 1.25601074  | 0.15630626  | 2.14950202  |
| C(Fragment=1) | 1.68848370  | 0.42259874  | 0.69392709  |
| C(Fragment=1) | 1.08516137  | 2.17983905  | -0.86544599 |
| C(Fragment=1) | 0.22155584  | 3.37888108  | -1.15832084 |
| C(Fragment=1) | 1.44037499  | -0.80357962 | -0.18474020 |
| C(Fragment=1) | 2.28467034  | -2.87552664 | -1.11765073 |
| H(Fragment=1) | 2.73097672  | 0.72061899  | 0.61647357  |
| H(Fragment=1) | -1.11314331 | 2.11652615  | 0.84755787  |
| H(Fragment=1) | 0.17979270  | 2.77048987  | 1.86912273  |
| H(Fragment=1) | 1.35748819  | -0.89079282 | 2.42761819  |
| H(Fragment=1) | 1.87695136  | 0.75121585  | 2.81848567  |
| H(Fragment=1) | 0.58194130  | 3.86020559  | -2.06123875 |
| H(Fragment=1) | 0.24231655  | 4.08366753  | -0.32749096 |
| H(Fragment=1) | -0.81507661 | 3.07348092  | -1.30377660 |
| H(Fragment=1) | 3.12372696  | -2.91915460 | -1.81177663 |
| H(Fragment=1) | 1.35595369  | -2.81010158 | -1.67164568 |
| H(Fragment=1) | 2.28541412  | -3.77972736 | -0.50876670 |
| H(Fragment=1) | -0.53997799 | 0.86529405  | 3.19100564  |
| H(Fragment=1) | -0.85368701 | -0.09128798 | 1.73651958  |
| N(Fragment=1) | 2.42645775  | -1.70146329 | -0.26921170 |
| C(Fragment=1) | 3.71426054  | -1.55513213 | 0.40020661  |
| H(Fragment=1) | 4.39706270  | -0.93907324 | -0.18688429 |
| H(Fragment=1) | 3.60209236  | -1.12808141 | 1.39259128  |
| H(Fragment=1) | 4.14838202  | -2.54534595 | 0.51257657  |
| C(Fragment=2) | -2.96969244 | -0.75940367 | -0.27186255 |
| N(Fragment=2) | -2.24960976 | 0.22501277  | -0.81698754 |
| H(Fragment=2) | -2.72797062 | 1.04828042  | -1.13538054 |
| H(Fragment=2) | -1.24281987 | 0.12386535  | -0.92487194 |
| N(Fragment=2) | -2.29191584 | -1.85173000 | 0.09386026  |
| H(Fragment=2) | -2.79166799 | -2.62114263 | 0.50120803  |
| H(Fragment=2) | -1.29641726 | -1.92008766 | -0.08092226 |
| S(Fragment=2) | -4.64894189 | -0.62880629 | -0.04878390 |

1 4 1.0 7 1.0 8 1.5  
2 8 2.0  
3 10 2.0  
4 5 1.0 13 1.0 14 1.0  
5 6 1.0 23 1.0 24 1.0  
6 7 1.0 15 1.0 16 1.0  
7 10 1.0 12 1.0  
8 9 1.0  
9 17 1.0 18 1.0 19 1.0  
10 25 1.5  
11 20 1.0 21 1.0 22 1.0 25 1.0  
12  
13  
14  
15  
16  
17  
18

19  
20  
21  
22  
23  
24  
25 26 1.0  
26 27 1.0 28 1.0 29 1.0  
27  
28  
29  
30 31 1.0 34 1.0 37 2.0  
31 32 1.0 33 1.0  
32  
33  
34 35 1.0 36 1.0  
35  
36  
37

**Ac-Pro-NMe2-endo-PPII-ureaacceptor**

optimized M062X/juncppVTZ/H2O

0 1  
N 0.04542629 1.31327922 0.42911114  
O 0.24196240 0.02761593 2.25634383  
O -0.50713694 -1.11936114 -0.68551882  
C 0.51789659 2.27376261 -0.57148560  
C -0.53996723 2.16023115 -1.66310330  
C -1.82108261 1.87721305 -0.87680697  
C -1.34457476 0.93485083 0.24480962  
C 0.74405417 0.83675851 1.47544748  
C 2.15213560 1.34644859 1.63259635  
C -1.46520319 -0.53290467 -0.17397439  
C -2.84720608 -2.52087116 -0.32234599  
H -1.88386577 1.08679818 1.17700425  
H 1.51345165 2.00816219 -0.91956045  
H 0.54671742 3.28102163 -0.14874104  
H -2.60659821 1.43461689 -1.48550719  
H -2.20498831 2.79533835 -0.43298079  
H 2.58944714 0.90387449 2.52163384  
H 2.15654377 2.43331375 1.71985386  
H 2.75164786 1.08323183 0.76057525  
H -3.17243892 -3.06006856 0.56802612  
H -1.91270819 -2.93692533 -0.67901911  
H -3.61217905 -2.62419709 -1.09207571  
H -0.60555841 3.05766611 -2.27239688  
H -0.30621099 1.31603704 -2.31288288  
N -2.65835198 -1.11579159 0.00408627  
C -3.80663391 -0.45702871 0.61271084  
H -3.80597812 -0.58553337 1.69649806  
H -3.83506194 0.60131835 0.37443076  
H -4.70900536 -0.91144393 0.20972496  
C 2.94767070 -1.19532932 -0.55029772  
N 2.22352023 -0.55797527 -1.50347014  
H 2.71167414 -0.19090423 -2.30016658  
H 1.21228952 -0.60022693 -1.48750842  
N 2.20727612 -1.82863451 0.40465479  
H 2.69341847 -2.07415685 1.24993195  
H 1.21867932 -1.62745764 0.47233382  
O 4.17931126 -1.20892919 -0.54646880

1 4 1.0 7 1.0 8 1.5  
2 8 2.0  
3 10 2.0  
4 5 1.0 13 1.0 14 1.0

5 6 1.0 23 1.0 24 1.0  
 6 7 1.0 15 1.0 16 1.0  
 7 10 1.0 12 1.0  
 8 9 1.0  
 9 17 1.0 18 1.0 19 1.0  
 10 25 1.5  
 11 20 1.0 21 1.0 22 1.0 25 1.0  
 12  
 13  
 14  
 15  
 16  
 17  
 18  
 19  
 20  
 21  
 22  
 23  
 24  
 25 26 1.0  
 26 27 1.0 28 1.0 29 1.0  
 27  
 28  
 29  
 30 31 1.0 34 1.0 37 2.0  
 31 32 1.0 33 1.0  
 32  
 33  
 34 35 1.0 36 1.0  
 35  
 36  
 37

**Ac-Pro-NMe2-exo-alpha-guanidinium**

optimized M062X/juncppVTZ/H2O

|     |             |             |             |
|-----|-------------|-------------|-------------|
| 1 1 |             |             |             |
| N   | -2.20539861 | -0.54897450 | 0.32433986  |
| O   | -1.02428026 | 0.17388999  | 2.08738518  |
| O   | 1.20074519  | 0.08134759  | -0.44521944 |
| C   | -3.42490805 | -0.97071016 | -0.36992345 |
| C   | -2.88566128 | -1.83374505 | -1.50818008 |
| C   | -1.54764699 | -1.17568156 | -1.84822802 |
| C   | -1.00302518 | -0.77653342 | -0.46888602 |
| C   | -2.11649997 | -0.09341181 | 1.58946343  |
| C   | -3.41188073 | 0.07903466  | 2.33697064  |
| C   | -0.00436699 | 0.37253116  | -0.51221741 |
| C   | 0.65548390  | 2.65688002  | -0.58801340 |
| H   | -3.56562454 | -1.87308329 | -2.35468611 |
| H   | -0.43538206 | -1.60110470 | -0.03426834 |
| H   | -3.97111923 | -0.10241778 | -0.74988891 |
| H   | -4.08158223 | -1.52030512 | 0.29997631  |
| H   | -1.70330130 | -0.29240734 | -2.46861368 |
| H   | -0.85979893 | -1.83572732 | -2.36921690 |
| H   | -3.21087715 | 0.58344537  | 3.27608878  |
| H   | -3.85962254 | -0.89449731 | 2.53921962  |
| H   | -4.12614043 | 0.65644558  | 1.75022671  |
| H   | 1.37160744  | 2.53463734  | -1.39989926 |
| H   | 1.18507860  | 2.58320864  | 0.36189366  |
| H   | 0.19451117  | 3.63615820  | -0.66297974 |
| H   | -2.71874994 | -2.84896685 | -1.14870717 |
| N   | -0.38896260 | 1.63994652  | -0.66449490 |
| C   | -1.76553442 | 2.10280440  | -0.77730227 |
| H   | -1.77457254 | 2.99390510  | -1.39947456 |
| H   | -2.39373635 | 1.36010470  | -1.25325088 |

|   |             |             |             |
|---|-------------|-------------|-------------|
| H | -2.18149103 | 2.35171479  | 0.20123733  |
| C | 4.30460885  | -0.53331952 | 0.22939179  |
| N | 3.91859633  | 0.68839725  | -0.11330659 |
| H | 4.58043041  | 1.44204678  | -0.17331878 |
| H | 2.93619138  | 0.84642524  | -0.31947039 |
| N | 3.40203687  | -1.50338321 | 0.28565236  |
| H | 3.66337016  | -2.43635744 | 0.55159434  |
| H | 2.43474498  | -1.28336677 | 0.06788075  |
| N | 5.58060347  | -0.78306253 | 0.51124453  |
| H | 6.27005871  | -0.05258582 | 0.47813741  |
| H | 5.88274272  | -1.70672967 | 0.76769572  |

1 4 1.0 7 1.0 8 1.5  
 2 8 2.0  
 3 10 2.0  
 4 5 1.0 14 1.0 15 1.0  
 5 6 1.0 12 1.0 24 1.0  
 6 7 1.0 16 1.0 17 1.0  
 7 10 1.0 13 1.0  
 8 9 1.0  
 9 18 1.0 19 1.0 20 1.0  
 10 25 1.5  
 11 21 1.0 22 1.0 23 1.0 25 1.0  
 12  
 13  
 14  
 15  
 16  
 17  
 18  
 19  
 20  
 21  
 22  
 23  
 24  
 25 26 1.0  
 26 27 1.0 28 1.0 29 1.0  
 27  
 28  
 29  
 30 31 1.5 34 1.5 37 1.5  
 31 32 1.0 33 1.0  
 32  
 33  
 34 35 1.0 36 1.0  
 35  
 36  
 37 38 1.0 39 1.0  
 38  
 39

#### Ac-Pro-NMe2-exo-alpha-H2OcisHFtrans

optimized M062X/junccpVTZ/H2O

|   |             |              |             |
|---|-------------|--------------|-------------|
| O | 1           |              |             |
| N | 1.63060455  | 0.19073105   | 0.18824949  |
| O | 0.90669701  | -1.07575055  | 1.88909972  |
| O | -1.92367681 | 0.20834848   | 0.41915704  |
| C | 2.64748379  | 0.79023927   | -0.68052318 |
| C | 1.97380211  | 2.07653782   | -1.15285077 |
| C | 0.49363871  | 1.69731792   | -1.22367270 |
| C | 0.31782079  | 0.79393469   | 0.00613491  |
| C | 1.83461195  | -0.711110831 | 1.16990343  |
| C | 3.23432542  | -1.24477243  | 1.31755363  |
| C | -0.85369789 | -0.16622247  | -0.11599827 |



|   |             |             |             |
|---|-------------|-------------|-------------|
| C | -1.92270580 | -2.21485106 | -0.72698014 |
| H | 2.36716514  | 2.42472086  | -2.10396679 |
| H | 0.07432523  | 1.39804777  | 0.88168386  |
| H | 2.87825470  | 0.12715318  | -1.51912135 |
| H | 3.56605807  | 0.97567608  | -0.12966752 |
| H | 0.28409464  | 1.14348005  | -2.13950342 |
| H | -0.17816006 | 2.55034283  | -1.18066271 |
| H | 3.22136000  | -2.07324057 | 2.01779146  |
| H | 3.89348230  | -0.46351854 | 1.69753929  |
| H | 3.62995984  | -1.57545642 | 0.35751924  |
| H | -1.59214438 | -3.20279250 | -1.03111730 |
| H | -2.71102599 | -1.87399899 | -1.39762536 |
| H | -2.31657419 | -2.26511375 | 0.28517880  |
| H | 2.11989413  | 2.85942744  | -0.40892090 |
| N | -0.77400399 | -1.31259356 | -0.77182001 |
| C | 0.38484553  | -1.77380114 | -1.52843674 |
| H | 0.02211351  | -2.35092533 | -2.37523735 |
| H | 0.96108802  | -0.94231678 | -1.91414248 |
| H | 1.02449768  | -2.40882052 | -0.91354854 |
| H | -2.11508780 | 2.02636773  | 0.83454351  |
| O | -2.14255363 | 2.99200579  | 0.93082790  |
| H | -2.43357690 | 3.14912634  | 1.83254587  |
| F | -4.30276853 | -0.43194314 | 0.29727653  |
| H | -3.35149143 | -0.23810849 | 0.31275834  |

1 4 1.0 7 1.0 8 1.5  
 2 8 2.0  
 3 10 2.0  
 4 5 1.0 14 1.0 15 1.0  
 5 6 1.0 12 1.0 24 1.0  
 6 7 1.0 16 1.0 17 1.0  
 7 10 1.0 13 1.0  
 8 9 1.0  
 9 18 1.0 19 1.0 20 1.0  
 10 25 1.5  
 11 21 1.0 22 1.0 23 1.0 25 1.0  
 12  
 13  
 14  
 15  
 16  
 17  
 18  
 19  
 20  
 21  
 22  
 23  
 24  
 25 26 1.0  
 26 27 1.0 28 1.0 29 1.0  
 27  
 28  
 29  
 30 31 1.0  
 31 32 1.0  
 32  
 33 34 1.0  
 34

**Ac-Pro-NMe2-exo-alpha-H2Ocis**

optimized M062X/juncppVTZ/H2O

|     |             |             |            |
|-----|-------------|-------------|------------|
| 0 1 |             |             |            |
| N   | -1.21005033 | -0.38853482 | 0.13400488 |
| O   | -0.72910645 | 0.77222468  | 1.99186697 |

|   |             |             |             |
|---|-------------|-------------|-------------|
| O | 2.30713514  | 0.13552665  | 0.45508285  |
| C | -2.10996429 | -1.03603547 | -0.82439412 |
| C | -1.23728067 | -2.13864280 | -1.41946033 |
| C | 0.16401434  | -1.52671559 | -1.40367848 |
| C | 0.18553065  | -0.75404984 | -0.07696415 |
| C | -1.57122199 | 0.35094282  | 1.20091544  |
| C | -3.04146938 | 0.63760449  | 1.35776628  |
| C | 1.20797972  | 0.37871784  | -0.05996349 |
| C | 1.90768546  | 2.64527457  | -0.51336919 |
| H | -1.56239898 | -2.43008085 | -2.41450015 |
| H | 0.50737895  | -1.41174938 | 0.73227237  |
| H | -2.43299057 | -0.32579856 | -1.59098908 |
| H | -2.99421908 | -1.42289205 | -0.32426800 |
| H | 0.29265409  | -0.84481703 | -2.24530777 |
| H | 0.96182744  | -2.26371547 | -1.44179290 |
| H | -3.17232113 | 1.38010995  | 2.13792642  |
| H | -3.57137343 | -0.27368090 | 1.63729187  |
| H | -3.47265891 | 0.99930381  | 0.42468999  |
| H | 2.39353502  | 2.82046780  | -1.47426009 |
| H | 2.65561304  | 2.39392074  | 0.22900945  |
| H | 1.38455657  | 3.55330621  | -0.21520954 |
| H | -1.26590002 | -3.01666863 | -0.77442321 |
| N | 0.94081365  | 1.56172704  | -0.62564390 |
| C | -0.28043154 | 1.91193627  | -1.33499515 |
| H | -0.02293861 | 2.64318078  | -2.09893403 |
| H | -0.71833809 | 1.05472342  | -1.83160930 |
| H | -1.01664611 | 2.35682253  | -0.66210166 |
| H | 2.77402268  | -1.51269339 | 0.94453742  |
| O | 3.04282652  | -2.42926750 | 1.15008323  |
| H | 2.82895841  | -2.55414879 | 2.07773621  |

1 4 1.0 7 1.0 8 1.5  
 2 8 2.0  
 3 10 2.0  
 4 5 1.0 14 1.0 15 1.0  
 5 6 1.0 12 1.0 24 1.0  
 6 7 1.0 16 1.0 17 1.0  
 7 10 1.0 13 1.0  
 8 9 1.0  
 9 18 1.0 19 1.0 20 1.0  
 10 25 1.5  
 11 21 1.0 22 1.0 23 1.0 25 1.0  
 12  
 13  
 14  
 15  
 16  
 17  
 18  
 19  
 20  
 21  
 22  
 23  
 24  
 25 26 1.0  
 26 27 1.0 28 1.0 29 1.0  
 27  
 28  
 29  
 30 31 1.0  
 31 32 1.0  
 32

**Ac-Pro-NMe2-exo-alpha-HFcis**

optimized M062X/junccpVTZ/H2O

|   |   |             |             |             |
|---|---|-------------|-------------|-------------|
| O | 1 |             |             |             |
| N |   | 1.24194656  | 0.24333933  | 0.15232404  |
| O |   | 0.52576998  | -0.87890837 | 1.95469418  |
| O |   | -2.32133150 | 0.24346276  | 0.39120154  |
| C |   | 2.25539386  | 0.75757104  | -0.77306090 |
| C |   | 1.57965930  | 1.99309674  | -1.36332076 |
| C |   | 0.09926973  | 1.60914448  | -1.39092128 |
| C |   | -0.07339193 | 0.82469905  | -0.08109603 |
| C |   | 1.45020033  | -0.57355192 | 1.20401371  |
| C |   | 2.85150382  | -1.09128149 | 1.38950577  |
| C |   | -1.24635467 | -0.14538928 | -0.11288470 |
| C |   | -2.28001403 | -2.26551654 | -0.62060259 |
| H |   | 1.96903601  | 2.24756129  | -2.34521967 |
| H |   | -0.30866684 | 1.50915847  | 0.73548584  |
| H |   | 2.48257770  | 0.01700509  | -1.54534146 |
| H |   | 3.17604998  | 0.99365816  | -0.24565286 |
| H |   | -0.11504813 | 0.97177199  | -2.24937496 |
| H |   | -0.57040061 | 2.46402025  | -1.42949661 |
| H |   | 2.84155729  | -1.86603157 | 2.14894570  |
| H |   | 3.50711597  | -0.28129316 | 1.71106601  |
| H |   | 3.24802432  | -1.48930800 | 0.45579787  |
| H |   | -2.73450720 | -2.37974231 | -1.60476549 |
| H |   | -3.01699966 | -1.89604514 | 0.08115227  |
| H |   | -1.90803867 | -3.23423791 | -0.28929304 |
| H |   | 1.72945799  | 2.84350259  | -0.69849288 |
| N |   | -1.15819829 | -1.33601749 | -0.69471896 |
| C |   | 0.01340728  | -1.85827081 | -1.38595203 |
| H |   | -0.33845357 | -2.53955205 | -2.15750542 |
| H |   | 0.58014702  | -1.07152245 | -1.86844089 |
| H |   | 0.66008987  | -2.41040691 | -0.70155236 |
| F |   | -2.54276660 | 2.42404061  | 1.42592853  |
| H |   | -2.43682998 | 1.53440051  | 1.00484267  |

1 4 1.0 7 1.0 8 1.5  
 2 8 2.0  
 3 10 2.0  
 4 5 1.0 14 1.0 15 1.0  
 5 6 1.0 12 1.0 24 1.0  
 6 7 1.0 16 1.0 17 1.0  
 7 10 1.0 13 1.0  
 8 9 1.0  
 9 18 1.0 19 1.0 20 1.0  
 10 25 1.5  
 11 21 1.0 22 1.0 23 1.0 25 1.0  
 12  
 13  
 14  
 15  
 16  
 17  
 18  
 19  
 20  
 21  
 22  
 23  
 24  
 25 26 1.0  
 26 27 1.0 28 1.0 29 1.0  
 27  
 28  
 29  
 30 31 1.0  
 31

**Ac-Pro-NMe2-exo-alpha-HFdonor-HFHAcceptor**

optimized M062X/juncppVTZ/H2O

0 1  
N 1.47907096 -0.61700668 -0.09500384  
O 0.99287548 1.45962232 -0.73199077  
O -2.01879170 -0.04854768 -0.45775528  
C 2.36202245 -1.72548675 0.29378788  
C 1.55724782 -2.95650400 -0.11403869  
C 0.10623173 -2.52595586 0.10792140  
C 0.11327302 -1.06341796 -0.36042779  
C 1.84413778 0.64108744 -0.33253234  
C 3.27545865 1.01777431 -0.09768892  
C -0.98967272 -0.21725727 0.25132601  
C -1.97978663 1.19369458 1.90695572  
H 1.82913044 -3.83376014 0.46570348  
H -0.06325231 -1.01587787 -1.43565482  
H 2.54465943 -1.70107113 1.37053506  
H 3.31603878 -1.65169555 -0.22081456  
H -0.15737904 -2.59262369 1.16356625  
H -0.61168698 -3.11300211 -0.45776750  
H 3.37875071 2.09679365 -0.15166743  
H 3.90175458 0.55926070 -0.86377801  
H 3.61634659 0.65861228 0.87227229  
H -1.61188684 1.76104003 2.75554076  
H -2.86136518 0.62662291 2.20314132  
H -2.24595164 1.87840247 1.10578127  
H 1.72445794 -3.17015950 -1.16911768  
N -0.91341648 0.29588270 1.46104294  
C 0.17413657 0.06759203 2.40825724  
H -0.25457491 0.04950214 3.40664488  
H 0.65703179 -0.88541078 2.23581638  
H 0.90941974 0.87123452 2.35117683  
F -4.39544244 0.65493388 -0.04053486  
H -3.47435449 0.40868224 -0.14069885  
F -2.18058263 -0.97370495 -2.75639026  
H -2.11098846 -0.61054600 -1.86221868  
F 1.64236517 3.78396131 -1.10292141  
H 1.38624535 2.84739508 -0.95551064

1 4 1.0 7 1.0 8 1.5  
2 8 2.0  
3 10 2.0  
4 5 1.0 14 1.0 15 1.0  
5 6 1.0 12 1.0 24 1.0  
6 7 1.0 16 1.0 17 1.0  
7 10 1.0 13 1.0  
8 9 1.0  
9 18 1.0 19 1.0 20 1.0  
10 25 2.0  
11 21 1.0 22 1.0 23 1.0 25 1.0  
12  
13  
14  
15  
16  
17  
18  
19  
20  
21  
22  
23  
24  
25 26 1.0  
26 27 1.0 28 1.0 29 1.0  
27

28  
29  
30 31 1.0  
31  
32 33 1.0  
33  
34 35 1.0  
35

**Ac-Pro-NMe2-exo-alpha-HFdonor**

optimized M062X/juncppVTZ/H2O

0 1  
N -0.05966335 -1.13732239 -0.05497577  
O 1.68846056 0.11341167 -0.64570215  
O -1.07326887 1.89849625 -1.62839514  
C -0.71469382 -2.31035174 0.53953019  
C -2.02575868 -2.39388683 -0.23615051  
C -2.35928465 -0.93018265 -0.52532006  
C -0.98750474 -0.31736337 -0.83918554  
C 1.24215158 -0.87466589 -0.02671368  
C 2.13030034 -1.78746802 0.76620580  
C -0.93019595 1.19603850 -0.63011596  
C -0.62861053 3.15122525 0.75681054  
H -2.80283306 -2.90373595 0.32638529  
H -0.75289696 -0.44336895 -1.89621062  
H -0.88763455 -2.14516472 1.60571179  
H -0.09438700 -3.19500871 0.42385176  
H -2.79842383 -0.45789990 0.35398804  
H -3.04670791 -0.79898051 -1.35599749  
H 3.11794992 -1.34584591 0.85258169  
H 2.21164254 -2.74968033 0.25958812  
H 1.71469824 -1.96491817 1.75710277  
H -1.51700622 3.57982061 1.22328251  
H -0.47745478 3.60542423 -0.21519796  
H 0.23199452 3.35302416 1.39473036  
H -1.86401300 -2.93026192 -1.17088838  
N -0.77945010 1.71200769 0.60321438  
C -0.68872251 0.95832147 1.84281484  
H -1.12131133 1.56548287 2.63617334  
H -1.25011394 0.03279130 1.79626773  
H 0.34986483 0.73993355 2.10341315  
F 4.06785128 0.59945276 -0.55961800  
H 3.10214539 0.39525273 -0.59036581

1 4 1.0 7 1.0 8 1.5  
2 8 2.0  
3 10 2.0  
4 5 1.0 14 1.0 15 1.0  
5 6 1.0 12 1.0 24 1.0  
6 7 1.0 16 1.0 17 1.0  
7 10 1.0 13 1.0  
8 9 1.0  
9 18 1.0 19 1.0 20 1.0  
10 25 1.5  
11 21 1.0 22 1.0 23 1.0 25 1.0  
12  
13  
14  
15  
16  
17  
18  
19  
20  
21

22  
23  
24  
25 26 1.0  
26 27 1.0 28 1.0 29 1.0  
27  
28  
29  
30 31 1.0  
31

**Ac-Pro-NMe2-exo-alpha-HFHAcceptor**

optimized M062X/juncppVTZ/H2O

0 1  
N 1.63069748 0.18065606 0.14721406  
O 0.80573441 -0.84487307 1.95932686  
O -1.91876894 0.38923571 0.33992436  
C 2.69008211 0.61322455 -0.76845891  
C 2.09996876 1.87271942 -1.39900992  
C 0.59911549 1.57958505 -1.44732172  
C 0.35914215 0.83415084 -0.12443891  
C 1.76606323 -0.61699915 1.22704214  
C 3.12927873 -1.20787156 1.46461231  
C -0.85370733 -0.07794994 -0.15253448  
C -2.00479393 -2.14346555 -0.53940366  
H 2.52059664 2.07855144 -2.37935494  
H 0.14772692 1.54911878 0.67252219  
H 2.88715289 -0.15656438 -1.51976064  
H 3.61281537 0.80719593 -0.22780800  
H 0.35952375 0.94118556 -2.29786449  
H -0.01606603 2.47270994 -1.51147397  
H 3.05213184 -1.96615919 2.23669632  
H 3.81772322 -0.42852466 1.79354999  
H 3.53253663 -1.64397044 0.55122255  
H -1.67892650 -3.17534004 -0.62814560  
H -2.73931010 -1.92721009 -1.31444273  
H -2.45709086 -1.99359608 0.43679630  
H 2.28982821 2.72858259 -0.75186802  
N -0.83034788 -1.28333253 -0.68183036  
C 0.30257749 -1.86973452 -1.39207960  
H -0.09545677 -2.50968393 -2.17531366  
H 0.91587761 -1.10990963 -1.85842499  
H 0.91152254 -2.47142358 -0.71604687  
F -4.34306597 -0.09270357 -0.05975446  
H -3.40026483 0.03949905 0.07218033  
F -1.98346070 2.59235470 1.47354428  
H -1.94611154 1.73055791 1.03128882

1 4 1.0 7 1.0 8 1.5  
2 8 2.0  
3 10 2.0  
4 5 1.0 14 1.0 15 1.0  
5 6 1.0 12 1.0 24 1.0  
6 7 1.0 16 1.0 17 1.0  
7 10 1.0 13 1.0  
8 9 1.0  
9 18 1.0 19 1.0 20 1.0  
10 25 2.0  
11 21 1.0 22 1.0 23 1.0 25 1.0  
12  
13  
14  
15  
16  
17

18  
 19  
 20  
 21  
 22  
 23  
 24  
 25 26 1.0  
 26 27 1.0 28 1.0 29 1.0  
 27  
 28  
 29  
 30 31 1.0  
 31  
 32 33 1.0  
 33

**Ac-Pro-NMe2-exo-alpha-HFHDonor-HFHAcceptor**

optimized M062X/juncppVTZ/H2O

0 1  
 N -1.42752820 0.83215484 -0.06206214  
 O -1.23548128 -1.34679664 -0.52984902  
 O 2.02870500 -0.09266946 -0.22331482  
 C -2.17676163 2.07253364 0.20920666  
 C -1.21862506 3.15697057 -0.27128211  
 C 0.16027469 2.57882130 0.04354180  
 C -0.00659482 1.09245037 -0.31016844  
 C -1.95633865 -0.37283324 -0.18455643  
 C -3.41206080 -0.55304373 0.10523351  
 C 0.98209932 0.19291159 0.41492207  
 C 1.74494842 -1.20931716 2.19730302  
 H -1.39907267 4.10699922 0.22283723  
 H 0.19708286 0.93792933 -1.37078755  
 H -2.38170268 2.15651732 1.27836718  
 H -3.12037227 2.06725824 -0.32841782  
 H 0.39316597 2.69596585 1.10215830  
 H 0.96386623 3.02705975 -0.53352183  
 H -3.62633072 -1.60922116 0.23394188  
 H -3.99047580 -0.17561564 -0.73968369  
 H -3.70813278 0.00113655 0.99356234  
 H 1.25606903 -1.73585034 3.01098617  
 H 2.62961810 -0.69693491 2.57389875  
 H 2.03932489 -1.92279571 1.43279958  
 H -1.32942994 3.29536971 -1.34610403  
 N 0.79057669 -0.24957700 1.64040291  
 C -0.29328387 0.15619894 2.53002324  
 H 0.11332552 0.22393084 3.53580021  
 H -0.68185107 1.13014156 2.26253937  
 H -1.09593277 -0.58236449 2.52222831  
 F 4.33049093 -0.87768587 0.42725938  
 H 3.43514034 -0.59814350 0.23332041  
 F 2.52842835 1.00650654 -2.41422951  
 H 2.31423565 0.54563184 -1.59572111  
 F -2.19185790 -3.64649845 -0.46680917  
 H -1.82384865 -2.75422759 -0.49327507  
 F 0.35469100 -1.37215509 -2.51066266  
 H -0.20952543 -1.35476082 -1.74336565

1 4 1.0 7 1.0 8 2.0  
 2 8 2.0  
 3 10 2.0  
 4 5 1.0 14 1.0 15 1.0  
 5 6 1.0 12 1.0 24 1.0  
 6 7 1.0 16 1.0 17 1.0  
 7 10 1.0 13 1.0

8 9 1.0  
 9 18 1.0 19 1.0 20 1.0  
 10 25 2.0  
 11 21 1.0 22 1.0 23 1.0 25 1.0  
 12  
 13  
 14  
 15  
 16  
 17  
 18  
 19  
 20  
 21  
 22  
 23  
 24  
 25 26 1.0  
 26 27 1.0 28 1.0 29 1.0  
 27  
 28  
 29  
 30 31 1.0  
 31  
 32 33 1.0  
 33  
 34 35 1.0  
 35  
 36 37 1.0  
 37

**Ac-Pro-NMe2-exo-alpha-HFHDonor**

optimized M062X/juncppVTZ/H2O

|     |             |             |             |
|-----|-------------|-------------|-------------|
| 0 1 |             |             |             |
| N   | 0.40280152  | -1.13581769 | -0.06276968 |
| O   | -1.62798057 | -0.24109853 | 0.22154694  |
| O   | 0.69529585  | 2.11248190  | 1.40881935  |
| C   | 1.33855745  | -2.18564175 | -0.50079500 |
| C   | 2.52023307  | -1.99764858 | 0.44406236  |
| C   | 2.54704067  | -0.48821584 | 0.67946972  |
| C   | 1.05900513  | -0.12272154 | 0.77681589  |
| C   | -0.89458283 | -1.12850210 | -0.29629126 |
| C   | -1.47315902 | -2.18348824 | -1.18578961 |
| C   | 0.77437202  | 1.34555505  | 0.45305089  |
| C   | 0.29720234  | 3.14718633  | -1.07690922 |
| H   | 3.44491583  | -2.37781650 | 0.01942044  |
| H   | 0.70980801  | -0.24214171 | 1.80220352  |
| H   | 1.62321969  | -2.01967479 | -1.54202096 |
| H   | 0.87455287  | -3.16433207 | -0.41844596 |
| H   | 3.01164528  | 0.02242402  | -0.16459507 |
| H   | 3.07797490  | -0.19962448 | 1.58178758  |
| H   | -2.48566329 | -1.90895660 | -1.46401872 |
| H   | -1.49979313 | -3.13025487 | -0.64400870 |
| H   | -0.86473991 | -2.32283569 | -2.07749290 |
| H   | 1.17497020  | 3.72894627  | -1.36337907 |
| H   | -0.14317175 | 3.57842597  | -0.18538531 |
| H   | -0.42359542 | 3.17443719  | -1.89290726 |
| H   | 2.32673136  | -2.51897753 | 1.38105665  |
| N   | 0.66121463  | 1.76098486  | -0.82047824 |
| C   | 0.88419549  | 0.95806831  | -2.01163646 |
| H   | 1.32358155  | 1.60057211  | -2.77265962 |
| H   | 1.58003903  | 0.14817299  | -1.82866183 |
| H   | -0.05195435 | 0.55243467  | -2.40295110 |
| F   | -3.99069202 | -0.05047449 | -0.50211394 |
| H   | -3.06686764 | -0.13027308 | -0.21947851 |



|   |             |            |            |
|---|-------------|------------|------------|
| F | -1.70813552 | 0.23789209 | 2.71004096 |
| H | -1.62602663 | 0.10792876 | 1.76813482 |

1 4 1.0 7 1.0 8 2.0  
2 8 2.0  
3 10 2.0  
4 5 1.0 14 1.0 15 1.0  
5 6 1.0 12 1.0 24 1.0  
6 7 1.0 16 1.0 17 1.0  
7 10 1.0 13 1.0  
8 9 1.0  
9 18 1.0 19 1.0 20 1.0  
10 25 1.5  
11 21 1.0 22 1.0 23 1.0 25 1.0  
12  
13  
14  
15  
16  
17  
18  
19  
20  
21  
22  
23  
24  
25 26 1.0  
26 27 1.0 28 1.0 29 1.0  
27  
28  
29  
30 31 1.0  
31  
32 33 1.0  
33

### Ac-Pro-NMe2-exo-alpha-HFtrans

optimized M062X/juncppVTZ/H2O

|   |   |             |             |             |
|---|---|-------------|-------------|-------------|
| O | 1 |             |             |             |
| N |   | -1.50459419 | 0.04192217  | -0.27918103 |
| O |   | -0.59879036 | -1.73735238 | -1.29875231 |
| O |   | 1.95046920  | 0.51218913  | -0.95737077 |
| C |   | -2.58756229 | 0.79062378  | 0.36510585  |
| C |   | -2.16817202 | 2.24363631  | 0.15350605  |
| C |   | -0.64081587 | 2.18081209  | 0.19589552  |
| C |   | -0.33372488 | 0.86893688  | -0.54193479 |
| C |   | -1.55243961 | -1.23516263 | -0.70717436 |
| C |   | -2.81465034 | -2.00006545 | -0.40943529 |
| C |   | 1.01357013  | 0.26795965  | -0.17117242 |
| C |   | 2.49063399  | -1.07870875 | 1.14348119  |
| H |   | -2.58553026 | 2.90751615  | 0.90560357  |
| H |   | -0.25113917 | 1.05061774  | -1.61444082 |
| H |   | -2.64749463 | 0.54332071  | 1.42890643  |
| H |   | -3.54515520 | 0.55803074  | -0.09406670 |
| H |   | -0.28930744 | 2.13160340  | 1.22696714  |
| H |   | -0.15766613 | 3.02663147  | -0.28481005 |
| H |   | -2.64848855 | -3.04917479 | -0.63044665 |
| H |   | -3.63017943 | -1.62753120 | -1.03039126 |
| H |   | -3.10957158 | -1.88137705 | 0.63276426  |
| H |   | 2.37081424  | -1.86905207 | 1.87808396  |
| H |   | 3.22681356  | -0.35976833 | 1.50286482  |
| H |   | 2.84651697  | -1.50838189 | 0.21018795  |
| H |   | -2.49881529 | 2.58098199  | -0.82862156 |
| N |   | 1.19297088  | -0.44121041 | 0.93707164  |

|   |             |             |             |
|---|-------------|-------------|-------------|
| C | 0.18286513  | -0.68625669 | 1.95918381  |
| H | 0.68470108  | -0.73299520 | 2.92259941  |
| H | -0.54363390 | 0.11522737  | 2.00027486  |
| H | -0.33044177 | -1.63336993 | 1.78204101  |
| F | 4.39168164  | 0.42335996  | -0.84974241 |
| H | 3.41314967  | 0.42315378  | -0.84081771 |

1 4 1.0 7 1.0 8 1.5  
 2 8 2.0  
 3 10 2.0  
 4 5 1.0 14 1.0 15 1.0  
 5 6 1.0 12 1.0 24 1.0  
 6 7 1.0 16 1.0 17 1.0  
 7 10 1.0 13 1.0  
 8 9 1.0  
 9 18 1.0 19 1.0 20 1.0  
 10 25 1.5  
 11 21 1.0 22 1.0 23 1.0 25 1.0  
 12  
 13  
 14  
 15  
 16  
 17  
 18  
 19  
 20  
 21  
 22  
 23  
 24  
 25 26 1.0  
 26 27 1.0 28 1.0 29 1.0  
 27  
 28  
 29  
 30 31 1.0  
 31

**Ac-Pro-NMe2-exo-alpha-thioureaacceptor**

optimized M062X/juncppVTZ/H2O

|     |             |             |             |
|-----|-------------|-------------|-------------|
| 0 1 |             |             |             |
| N   | -2.52029463 | -0.62904379 | 0.29141991  |
| O   | -1.67698814 | 0.34007461  | 2.12955015  |
| O   | 0.87161446  | 0.35189870  | -0.19568796 |
| C   | -3.57572489 | -1.26285959 | -0.50316426 |
| C   | -2.78963516 | -2.14826110 | -1.46728656 |
| C   | -1.50147863 | -1.35845456 | -1.70353192 |
| C   | -1.20336028 | -0.76343478 | -0.31882318 |
| C   | -2.65430929 | -0.08873407 | 1.51919559  |
| C   | -4.04909431 | -0.03421673 | 2.08424402  |
| C   | -0.34651867 | 0.49472061  | -0.37626468 |
| C   | 0.00868024  | 2.85306625  | -0.60085082 |
| H   | -3.33736320 | -2.34991272 | -2.38380068 |
| H   | -0.60366774 | -1.45983319 | 0.26984713  |
| H   | -4.16132296 | -0.50938883 | -1.03774953 |
| H   | -4.24999888 | -1.83086572 | 0.13270789  |
| H   | -1.66883744 | -0.56533449 | -2.43284898 |
| H   | -0.67564522 | -1.97026156 | -2.05554074 |
| H   | -4.04005352 | 0.57428730  | 2.98242788  |
| H   | -4.38722213 | -1.04007555 | 2.33599646  |
| H   | -4.75028768 | 0.38014872  | 1.36047349  |
| H   | 0.51805742  | 2.99915413  | -1.55461245 |
| H   | 0.75134641  | 2.72098832  | 0.18041250  |

|   |             |             |             |
|---|-------------|-------------|-------------|
| H | -0.59242619 | 3.73116676  | -0.37964807 |
| H | -2.55931250 | -3.09782288 | -0.98451871 |
| N | -0.87045796 | 1.69066175  | -0.65132711 |
| C | -2.25968780 | 1.95417191  | -0.99981543 |
| H | -2.27778730 | 2.78478624  | -1.70201393 |
| H | -2.71909263 | 1.10154113  | -1.48440171 |
| H | -2.84349821 | 2.22650965  | -0.11828060 |
| C | 4.12101716  | -0.29721857 | 0.16726691  |
| N | 3.68291791  | 0.90306421  | -0.22179697 |
| H | 4.35422471  | 1.62392418  | -0.41417813 |
| H | 2.68927449  | 1.07998305  | -0.32522629 |
| N | 3.18599975  | -1.21978342 | 0.40635733  |
| H | 3.47386717  | -2.13426068 | 0.70317668  |
| H | 2.20258121  | -0.99685308 | 0.28994022  |
| S | 5.77960422  | -0.63191467 | 0.34803436  |

1 4 1.0 7 1.0 8 1.5  
 2 8 2.0  
 3 10 2.0  
 4 5 1.0 14 1.0 15 1.0  
 5 6 1.0 12 1.0 24 1.0  
 6 7 1.0 16 1.0 17 1.0  
 7 10 1.0 13 1.0  
 8 9 1.0  
 9 18 1.0 19 1.0 20 1.0  
 10 25 1.5  
 11 21 1.0 22 1.0 23 1.0 25 1.0  
 12  
 13  
 14  
 15  
 16  
 17  
 18  
 19  
 20  
 21  
 22  
 23  
 24  
 25 26 1.0  
 26 27 1.0 28 1.0 29 1.0  
 27  
 28  
 29  
 30 31 1.5 34 1.5 37 2.0  
 31 32 1.0 33 1.0  
 32  
 33  
 34 35 1.0 36 1.0  
 35  
 36  
 37

*This structure had one negative/imaginary frequency.*

**Ac-Pro-NMe2-exo-alpha-ureaacceptor**

optimized M062X/juncppVTZ/H2O

0 1  
N -2.14459521 -0.60782676 0.26409641  
O -1.31249491 0.33847179 2.11940318  
O 1.25959472 0.34637628 -0.18069013  
C -3.19719305 -1.22650916 -0.54587813  
C -2.40866071 -2.10821329 -1.51144427  
C -1.11333823 -1.32477816 -1.72881394  
C -0.82306379 -0.74493695 -0.33614513  
C -2.28657007 -0.07815041 1.49538526  
C -3.68629417 -0.01926759 2.04793070  
C 0.04740459 0.50631930 -0.37337007  
C 0.38649691 2.88342469 -0.57401830  
H -2.94973803 -2.29755506 -2.43452973  
H -0.23456446 -1.45224708 0.25084859  
H -3.77247734 -0.46380556 -1.07858635  
H -3.88127918 -1.79560897 0.07844443  
H -1.26915754 -0.52378748 -2.45202681  
H -0.28856783 -1.93878521 -2.07955165  
H -3.68159524 0.58179545 2.95115640  
H -4.03305220 -1.02498408 2.28831136  
H -4.37844689 0.40534962 1.32139698  
H 0.69998181 3.19499605 -1.57143942  
H 1.26252196 2.66143078 0.02497981  
H -0.17326535 3.69446575 -0.11126471  
H -2.18896848 -3.06382349 -1.03566428  
N -0.47086570 1.70783614 -0.64741129  
C -1.85764671 1.97962235 -0.99645112  
H -1.86925802 2.82712342 -1.67908123  
H -2.31785610 1.14034368 -1.50318605  
H -2.44520957 2.23556655 -0.11226347  
C 4.49967545 -0.55790023 0.30448637  
N 4.14816586 0.71751266 -0.02003569  
H 4.86654219 1.29160022 -0.42434913  
H 3.18016626 0.93110626 -0.21923881  
N 3.46228843 -1.36845606 0.64697395  
H 3.66936240 -2.34484949 0.75893203  
H 2.51569987 -1.08297708 0.43144554  
O 5.67281853 -0.93190798 0.33631376

1 4 1.0 7 1.0 8 1.5  
2 8 2.0  
3 10 2.0  
4 5 1.0 14 1.0 15 1.0  
5 6 1.0 12 1.0 24 1.0  
6 7 1.0 16 1.0 17 1.0  
7 10 1.0 13 1.0  
8 9 1.0  
9 18 1.0 19 1.0 20 1.0  
10 25 1.5  
11 21 1.0 22 1.0 23 1.0 25 1.0  
12  
13  
14  
15  
16  
17  
18  
19  
20  
21  
22  
23  
24

25 26 1.0  
26 27 1.0 28 1.0 29 1.0  
27  
28  
29  
30 31 1.5 34 1.5 37 2.0  
31 32 1.0 33 1.0  
32  
33  
34 35 1.0 36 1.0  
35  
36  
37

**Ac-Pro-NMe2-exo-PPII-2H2Oacceptor3H2O**

optimized M062X/juncppVTZ/H2O 5 H2O

0 1  
N -1.34798900 -1.27162300 -0.30358300  
O -0.86270100 -0.28971000 -2.25659500  
O 0.35168700 0.78728400 0.37216100  
C -1.47472700 -2.40309500 0.62047200  
C -2.53609400 -1.91335800 1.59967100  
C -2.25395400 -0.41388100 1.68971400  
C -1.88918600 -0.03460800 0.24374500  
C -0.87453500 -1.31015900 -1.55783800  
C -0.36576500 -2.63291900 -2.05824100  
C -0.85072700 1.07900500 0.22219100  
C -0.33618400 3.44332900 0.05486900  
H -2.47162900 -2.41154100 2.56326800  
H -2.76644600 0.25159900 -0.33319400  
H -0.51999400 -2.58703200 1.11814900  
H -1.77170900 -3.30275800 0.08787800  
H -1.39243600 -0.23527200 2.33535500  
H -3.09339800 0.16623000 2.06422800  
H 0.11874100 -2.48140900 -3.01755600  
H -1.19621900 -3.32909400 -2.18127500  
H 0.33785800 -3.05996400 -1.34539300  
H -0.41723100 3.94843500 -0.90752600  
H 0.67558000 3.08026500 0.18943400  
H -0.57433300 4.15074700 0.84760100  
H -3.52905200 -2.08344700 1.18360500  
N -1.27701500 2.33047900 0.09697300  
C -2.68287900 2.68391400 -0.09281200  
H -2.99744400 2.50064700 -1.12040400  
H -3.32416200 2.13627300 0.59179200  
H -2.79122400 3.74291100 0.12180600  
H 1.15063200 -0.92632300 0.34363600  
O 1.76913800 -1.67663400 0.36818500  
H 2.53948800 -1.36988700 -0.13591500  
O 3.00125700 1.40829500 1.22531800  
H 3.43343100 0.93406100 0.49721700  
H 2.05412800 1.32481200 1.03821000  
O 3.76063900 -0.19882200 -1.03892600  
H 3.12428400 0.18881600 -1.67397600  
H 4.58012100 -0.36484600 -1.51184600  
O 2.76651100 -0.90643700 2.94544900  
H 2.40251500 -1.36435800 2.17150400  
H 2.97292800 -0.03212800 2.58301400  
O 1.61822300 1.00936400 -2.18276400  
H 0.89786100 0.48553400 -2.56806100  
H 1.27902200 1.16965100 -1.28852500

1 4 1.0 7 1.0 8 1.5  
2 8 2.0  
3 10 2.0

4 5 1.0 14 1.0 15 1.0  
 5 6 1.0 12 1.0 24 1.0  
 6 7 1.0 16 1.0 17 1.0  
 7 10 1.0 13 1.0  
 8 9 1.0  
 9 18 1.0 19 1.0 20 1.0  
 10 25 1.5  
 11 21 1.0 22 1.0 23 1.0 25 1.0  
 12  
 13  
 14  
 15  
 16  
 17  
 18  
 19  
 20  
 21  
 22  
 23  
 24  
 25 26 1.0  
 26 27 1.0 28 1.0 29 1.0  
 27  
 28  
 29  
 30 31 1.0  
 31 32 1.0  
 32  
 33 34 1.0 35 1.0  
 34  
 35  
 36 37 1.0 38 1.0  
 37  
 38  
 39 40 1.0 41 1.0  
 40  
 41  
 42 43 1.0 44 1.0  
 43  
 44

**Ac-Pro-NMe2-exo-PPH-guanidinium**

optimized M062X/juncppVTZ/H2O

1 1 0 1 1 1  
 N(Fragment=1) -0.03092600 1.28594000 0.41143900  
 O(Fragment=1) 0.04913600 -0.19207400 2.09400800  
 O(Fragment=1) -0.44104700 -1.15915900 -0.79555300  
 C(Fragment=1) 0.42969100 2.44745100 -0.35548800  
 C(Fragment=1) -0.86636500 2.99312800 -0.94709700  
 C(Fragment=1) -1.69616900 1.73098600 -1.18012400  
 C(Fragment=1) -1.38031800 0.87224400 0.05438300  
 C(Fragment=1) 0.59017300 0.71307700 1.45880900  
 C(Fragment=1) 1.96379300 1.22944200 1.79685500  
 C(Fragment=1) -1.42720400 -0.61561100 -0.27695200  
 C(Fragment=1) -2.67037900 -2.69370600 -0.30572200  
 H(Fragment=1) -0.69752400 3.56122900 -1.85799200  
 H(Fragment=1) -2.04901500 1.09804800 0.88378900  
 H(Fragment=1) 1.12486300 2.13484800 -1.13852900  
 H(Fragment=1) 0.93344200 3.16226800 0.29055200  
 H(Fragment=1) -1.34560200 1.21414400 -2.07530500  
 H(Fragment=1) -2.76072000 1.92272900 -1.28679400  
 H(Fragment=1) 2.43315200 0.54445500 2.49561200  
 H(Fragment=1) 1.88411700 2.21466600 2.25841000  
 H(Fragment=1) 2.57928200 1.33303900 0.90275600

|               |             |             |             |
|---------------|-------------|-------------|-------------|
| H(Fragment=1) | -2.95219400 | -3.21038700 | 0.61171200  |
| H(Fragment=1) | -1.71561200 | -3.06630300 | -0.65599800 |
| H(Fragment=1) | -3.43487300 | -2.87584000 | -1.06064400 |
| H(Fragment=1) | -1.36096300 | 3.63751900  | -0.22038800 |
| N(Fragment=1) | -2.56714400 | -1.26524700 | -0.04180000 |
| C(Fragment=1) | -3.74485500 | -0.64223700 | 0.55465000  |
| H(Fragment=1) | -3.64327300 | -0.55983500 | 1.63747100  |
| H(Fragment=1) | -3.93313000 | 0.33923400  | 0.12893200  |
| H(Fragment=1) | -4.60289900 | -1.27050100 | 0.33186400  |
| C(Fragment=2) | 2.84510700  | -1.08464900 | -0.57985000 |
| N(Fragment=2) | 2.16709400  | -1.76615300 | 0.33477800  |
| H(Fragment=2) | 2.63653000  | -2.19364700 | 1.11429400  |
| H(Fragment=2) | 1.15392500  | -1.72483100 | 0.32478000  |
| N(Fragment=2) | 2.17473500  | -0.41276500 | -1.50597000 |
| H(Fragment=2) | 2.65418700  | 0.04255400  | -2.26308100 |
| H(Fragment=2) | 1.15693400  | -0.46028000 | -1.48698900 |
| N(Fragment=1) | 4.17467600  | -1.06584400 | -0.55650900 |
| H(Fragment=1) | 4.69671400  | -0.55844400 | -1.24983700 |
| H(Fragment=1) | 4.68805800  | -1.60707900 | 0.11739300  |

1 4 1.0 7 1.0 8 1.5  
 2 8 2.0  
 3 10 2.0  
 4 5 1.0 14 1.0 15 1.0  
 5 6 1.0 12 1.0 24 1.0  
 6 7 1.0 16 1.0 17 1.0  
 7 10 1.0 13 1.0  
 8 9 1.0  
 9 18 1.0 19 1.0 20 1.0  
 10 25 1.5  
 11 21 1.0 22 1.0 23 1.0 25 1.0  
 12  
 13  
 14  
 15  
 16  
 17  
 18  
 19  
 20  
 21  
 22  
 23  
 24  
 25 26 1.0  
 26 27 1.0 28 1.0 29 1.0  
 27  
 28  
 29  
 30 31 1.5 34 1.5 37 1.5  
 31 32 1.0 33 1.0  
 32  
 33  
 34 35 1.0 36 1.0  
 35  
 36  
 37 38 1.0 39 1.0  
 38  
 39

#### Ac-Pro-NMe2-exo-PPII-H2OcisHFtrans

M062X/juncppVTZ/H2O optimized

|     |             |             |            |
|-----|-------------|-------------|------------|
| 0 1 |             |             |            |
| N   | -1.43415722 | -0.38798508 | 0.17183829 |
| O   | -0.68533624 | 0.20459534  | 2.19744495 |

|   |             |             |             |
|---|-------------|-------------|-------------|
| O | 0.92448023  | 0.91196318  | -0.37347931 |
| C | -2.43702234 | -0.52307924 | -0.88953186 |
| C | -1.96887885 | -1.77120631 | -1.62978884 |
| C | -0.44715840 | -1.68374168 | -1.52050691 |
| C | -0.22848408 | -1.15772133 | -0.09197005 |
| C | -1.58472652 | 0.23334204  | 1.35818234  |
| C | -2.89201283 | 0.94052469  | 1.59176297  |
| C | 1.01118537  | -0.28168999 | -0.01503966 |
| C | 3.32797590  | 0.04007313  | 0.52109865  |
| H | -2.31588596 | -1.79825513 | -2.65929824 |
| H | -0.15739905 | -1.96642125 | 0.63428311  |
| H | -2.42211139 | 0.35841956  | -1.53386747 |
| H | -3.43225239 | -0.63247633 | -0.46624292 |
| H | -0.06477787 | -0.95161337 | -2.23334621 |
| H | 0.05730626  | -2.63124555 | -1.69218611 |
| H | -2.81217764 | 1.53533080  | 2.49593853  |
| H | -3.69056640 | 0.20774477  | 1.71525039  |
| H | -3.13896843 | 1.57810197  | 0.74467130  |
| H | 4.03969999  | -0.45683384 | 1.17300942  |
| H | 3.04264253  | 0.99063046  | 0.96398165  |
| H | 3.79228769  | 0.22409107  | -0.44774131 |
| H | -2.32965982 | -2.66250601 | -1.11638259 |
| N | 2.15434905  | -0.81753693 | 0.38191822  |
| C | 2.32051293  | -2.23337277 | 0.70245052  |
| H | 2.12018105  | -2.42063184 | 1.75752293  |
| H | 1.67450210  | -2.85318779 | 0.08998270  |
| H | 3.34800351  | -2.50928689 | 0.48264701  |
| H | -0.60131852 | 1.94811928  | -0.66866685 |
| O | -1.30378388 | 2.59756529  | -0.83815657 |
| H | -0.84286766 | 3.41783166  | -1.03292287 |
| F | 2.51747362  | 2.66982205  | -1.04158887 |
| H | 1.94352859  | 1.94068234  | -0.75504375 |

1 4 1.0 7 1.0 8 1.5  
2 8 2.0  
3 10 2.0  
4 5 1.0 14 1.0 15 1.0  
5 6 1.0 12 1.0 24 1.0  
6 7 1.0 16 1.0 17 1.0  
7 10 1.0 13 1.0  
8 9 1.0  
9 18 1.0 19 1.0 20 1.0  
10 25 1.5  
11 21 1.0 22 1.0 23 1.0 25 1.0  
12  
13  
14  
15  
16  
17  
18  
19  
20  
21  
22  
23  
24  
25 26 1.0  
26 27 1.0 28 1.0 29 1.0  
27  
28  
29  
30 31 1.0  
31 32 1.0  
32  
33 34 1.0  
34



Ac-Pro-NMe2-exo-PPII-H2Ocis

M062X/juncopVTZ/H2O optimized

|     |             |             |             |
|-----|-------------|-------------|-------------|
| 0 1 |             |             |             |
| N   | -1.12007969 | 0.35368771  | -0.37381619 |
| O   | -0.49645539 | -1.31887108 | -1.72964147 |
| O   | 0.74341679  | -0.98632073 | 1.16079310  |
| C   | -2.08362763 | 1.20417294  | 0.32813849  |
| C   | -1.33128436 | 2.52517024  | 0.44328316  |
| C   | 0.11462477  | 2.07377114  | 0.64696052  |
| C   | 0.24330789  | 0.85476091  | -0.28310495 |
| C   | -1.39377283 | -0.72460381 | -1.13149532 |
| C   | -2.83646491 | -1.14751870 | -1.21156825 |
| C   | 1.17498206  | -0.19306232 | 0.32017328  |
| C   | 3.39305508  | -1.16256080 | 0.44658398  |
| H   | -1.69831084 | 3.14481418  | 1.25736502  |
| H   | 0.58057413  | 1.13811328  | -1.27897334 |
| H   | -2.30982052 | 0.78164522  | 1.30991344  |
| H   | -3.00742805 | 1.29086740  | -0.23808158 |
| H   | 0.25919910  | 1.75120270  | 1.67936566  |
| H   | 0.84857118  | 2.84325242  | 0.42054634  |
| H   | -2.89253585 | -2.10749464 | -1.71471169 |
| H   | -3.40916622 | -0.41241027 | -1.77841443 |
| H   | -3.26562477 | -1.22272511 | -0.21398872 |
| H   | 3.86662028  | -1.66743127 | -0.39566191 |
| H   | 2.85750576  | -1.88579304 | 1.04949221  |
| H   | 4.16738533  | -0.68600008 | 1.04834170  |
| H   | -1.42205987 | 3.08305899  | -0.48895153 |
| N   | 2.46076491  | -0.16353749 | -0.05322514 |
| C   | 3.00618076  | 0.78194578  | -1.01961588 |
| H   | 2.83642011  | 0.44709862  | -2.04432414 |
| H   | 2.58645548  | 1.77469369  | -0.88674872 |
| H   | 4.07782595  | 0.85212357  | -0.85073442 |
| H   | -0.94199532 | -1.39136240 | 1.60609323  |
| O   | -1.82134300 | -1.69896105 | 1.89984136  |
| H   | -1.64536463 | -2.30393409 | 2.62468813  |

1 4 1.0 7 1.0 8 1.5  
2 8 2.0  
3 10 2.0  
4 5 1.0 14 1.0 15 1.0  
5 6 1.0 12 1.0 24 1.0  
6 7 1.0 16 1.0 17 1.0  
7 10 1.0 13 1.0  
8 9 1.0  
9 18 1.0 19 1.0 20 1.0  
10 25 1.5  
11 21 1.0 22 1.0 23 1.0 25 1.0  
12  
13  
14  
15  
16  
17  
18  
19  
20  
21  
22  
23  
24  
25 26 1.0  
26 27 1.0 28 1.0 29 1.0  
27  
28  
29

30 31 1.0  
31 32 1.0  
32

*The above structure had one negative/imaginary frequency.*

### Ac-Pro-NMe2-exo-PPH-HFcis

M062X/juncppVTZ/H2O optimized

```
0 1
N      -1.16296542  0.28818832 -0.39140577
O      -0.48842676 -1.49092821 -1.57446242
O       0.76527784 -0.90397161  1.20638690
C      -2.14717923  1.15458793  0.25983903
C      -1.42909324  2.49934770  0.29078287
C       0.03016169  2.10094428  0.50941417
C       0.18430887  0.83273931 -0.34918215
C      -1.40124377 -0.87646488 -1.02331060
C      -2.82230653 -1.37064989 -1.01382299
C       1.15385416 -0.14557578  0.29976926
C       3.39461658 -1.04528990  0.47643125
H      -1.80713337  3.15597989  1.06984162
H       0.50704113  1.06457200 -1.36285297
H      -2.36108698  0.78752009  1.26619559
H      -3.07291108  1.18330664 -0.30940344
H       0.19141379  1.84592156  1.55801496
H       0.74051233  2.87466534  0.22949132
H      -2.84697453 -2.37573650 -1.42188309
H      -3.45006651 -0.72016899 -1.62374752
H      -3.21670892 -1.36938535  0.00143948
H       3.90265361 -1.56082121 -0.33779472
H       2.88446731 -1.76591716  1.10331460
H       4.13413169 -0.50360798  1.06595529
H      -1.54102816  2.99885293 -0.67161640
N       2.42606574 -0.11232572 -0.08468117
C       2.93966758  0.78968831 -1.11138829
H       2.75882329  0.39195137 -2.11060572
H       2.50340106  1.78016961 -1.02516593
H       4.01188836  0.88552306 -0.96290106
F      -1.46793367 -1.46580501  2.01451901
H      -0.60024761 -1.18838242  1.64706434
```

```
1 4 1.0 7 1.0 8 1.5
2 8 2.0
3 10 2.0
4 5 1.0 14 1.0 15 1.0
5 6 1.0 12 1.0 24 1.0
6 7 1.0 16 1.0 17 1.0
7 10 1.0 13 1.0
8 9 1.0
9 18 1.0 19 1.0 20 1.0
10 25 1.5
11 21 1.0 22 1.0 23 1.0 25 1.0
12
13
```

14  
15  
16  
17  
18  
19  
20  
21  
22  
23  
24  
25 26 1.0  
26 27 1.0 28 1.0 29 1.0  
27  
28  
29  
30 31 1.0  
31

**Ac-Pro-NMe2-exo-PPIL-HFdonor-HFHFacceptor**

M062X/juncppVTZ/H2O optimized

0 1  
N -1.23807179 0.78075653 -0.21512183  
O -1.15564552 -1.34015743 -0.88231694  
O 1.01598577 -0.24809429 0.99170853  
C -1.85150784 1.97578225 0.37744651  
C -1.05973443 3.10508172 -0.27062041  
C 0.34319784 2.51247408 -0.39808516  
C 0.07566641 1.04888057 -0.79004382  
C -1.78784749 -0.42629704 -0.31446169  
C -3.15176929 -0.63123357 0.26952956  
C 1.12992065 0.12589959 -0.20460552  
C 3.14407801 -1.17111406 -0.41234840  
H -1.07707213 4.01452752 0.32317686  
H 0.01746190 0.91466542 -1.86825505  
H -1.71873137 1.95555419 1.46063664  
H -2.91283814 2.01298636 0.14868834  
H 0.84777842 2.53885351 0.56879729  
H 0.96666859 3.02170283 -1.12799839  
H -3.39943964 -1.68774459 0.24735259  
H -3.88845266 -0.07662544 -0.31230569  
H -3.17553377 -0.26337960 1.29377432  
H 3.59999359 -1.68584291 -1.25306426  
H 2.65134407 -1.89605148 0.22808869  
H 3.91578922 -0.65061430 0.15395315  
H -1.46714385 3.32282151 -1.25752853  
N 2.16406178 -0.22356059 -0.93986878  
C 2.42088114 0.27915099 -2.28853769  
H 2.03765265 -0.41747269 -3.03345712  
H 1.98375504 1.25976516 -2.43649061  
H 3.49683390 0.37369840 -2.40900611  
F 2.74915224 -0.83161675 2.70799131  
H 2.12162301 -0.62127381 2.01256624  
F -0.91767054 -0.21898214 2.56941076  
H -0.20727904 -0.18609450 1.91842285  
F -2.16186643 -3.54762330 -1.08400279  
H -1.76090933 -2.65158102 -0.99778361

1 4 1.0 7 1.0 8 1.5  
2 8 2.0  
3 10 2.0  
4 5 1.0 14 1.0 15 1.0  
5 6 1.0 12 1.0 24 1.0  
6 7 1.0 16 1.0 17 1.0  
7 10 1.0 13 1.0

8 9 1.0  
 9 18 1.0 19 1.0 20 1.0  
 10 25 1.5  
 11 21 1.0 22 1.0 23 1.0 25 1.0  
 12  
 13  
 14  
 15  
 16  
 17  
 18  
 19  
 20  
 21  
 22  
 23  
 24  
 25 26 1.0  
 26 27 1.0 28 1.0 29 1.0  
 27  
 28  
 29  
 30 31 1.0  
 31  
 32 33 1.0  
 33  
 34 35 1.0  
 35

**Ac-Pro-NMe2-exo-PPII-HFdonor**

M062X/juncppVTZ/H2O optimized

|     |             |             |             |
|-----|-------------|-------------|-------------|
| 0 1 |             |             |             |
| N   | -0.93011007 | 0.88377793  | -0.02525078 |
| O   | -1.23443501 | -1.28472542 | -0.43523378 |
| O   | 0.86451982  | -0.29211802 | 1.67402750  |
| C   | -1.33676412 | 2.24505494  | 0.33525955  |
| C   | -0.28336964 | 3.09296716  | -0.36696817 |
| C   | 0.98062312  | 2.24379702  | -0.23251378 |
| C   | 0.47512068  | 0.80151514  | -0.41192917 |
| C   | -1.70424072 | -0.19189633 | -0.05065207 |
| C   | -3.13561520 | -0.04787353 | 0.37529985  |
| C   | 1.22759225  | -0.16094308 | 0.51009157  |
| C   | 3.05474690  | -1.72924322 | 0.79345942  |
| H   | -0.17937408 | 4.07753988  | 0.08091549  |
| H   | 0.52923908  | 0.47541960  | -1.44859177 |
| H   | -1.29251021 | 2.37264854  | 1.41925215  |
| H   | -2.34847208 | 2.44733693  | -0.00527908 |
| H   | 1.39677792  | 2.35582753  | 0.76939230  |
| H   | 1.75134708  | 2.49773750  | -0.95560347 |
| H   | -3.58387078 | -1.03131809 | 0.47487743  |
| H   | -3.68511523 | 0.51998073  | -0.37624231 |
| H   | -3.20552990 | 0.48919034  | 1.31951216  |
| H   | 3.06126177  | -2.69965978 | 0.29544467  |
| H   | 2.58789642  | -1.82449552 | 1.76658865  |
| H   | 4.08448691  | -1.39160829 | 0.91378669  |
| H   | -0.54880848 | 3.21263083  | -1.41725546 |
| N   | 2.30628830  | -0.77405699 | -0.00753192 |
| C   | 2.74106908  | -0.62526062 | -1.39031471 |
| H   | 2.16754464  | -1.26612159 | -2.06248480 |
| H   | 2.66850727  | 0.40630678  | -1.72333010 |
| H   | 3.78743660  | -0.91515750 | -1.44623589 |
| F   | -2.65535153 | -3.24568021 | -0.46726714 |
| H   | -2.08155332 | -2.43714001 | -0.45060825 |

1 4 1.0 7 1.0 8 1.5

2 8 2.0  
 3 10 2.0  
 4 5 1.0 14 1.0 15 1.0  
 5 6 1.0 12 1.0 24 1.0  
 6 7 1.0 16 1.0 17 1.0  
 7 10 1.0 13 1.0  
 8 9 1.0  
 9 18 1.0 19 1.0 20 1.0  
 10 25 1.5  
 11 21 1.0 22 1.0 23 1.0 25 1.0  
 12  
 13  
 14  
 15  
 16  
 17  
 18  
 19  
 20  
 21  
 22  
 23  
 24  
 25 26 1.0  
 26 27 1.0 28 1.0 29 1.0  
 27  
 28  
 29  
 30 31 1.0  
 31

**Ac-Pro-NMe2-exo-PPII-HFHAcceptor**

M062X/juncppVTZ/H2O optimized

|     |             |             |             |
|-----|-------------|-------------|-------------|
| 0 1 |             |             |             |
| N   | -1.48052782 | -0.33736490 | 0.15004882  |
| O   | -0.76643715 | 0.29063370  | 2.17674101  |
| O   | 0.92322797  | 0.94242824  | -0.31884488 |
| C   | -2.44907132 | -0.45130687 | -0.94409246 |
| C   | -1.97079398 | -1.69809087 | -1.67978608 |
| C   | -0.45253930 | -1.63095496 | -1.51889630 |
| C   | -0.27677810 | -1.11894779 | -0.07853675 |
| C   | -1.64577922 | 0.31674467  | 1.31704325  |
| C   | -2.93921123 | 1.06226617  | 1.49669688  |
| C   | 0.96951412  | -0.26147473 | 0.04665326  |
| C   | 3.27161740  | 0.02178703  | 0.69954066  |
| H   | -2.28196604 | -1.71096516 | -2.72090713 |
| H   | -0.23659255 | -1.93370716 | 0.64290753  |
| H   | -2.40332526 | 0.43606318  | -1.57931572 |
| H   | -3.45852255 | -0.55311245 | -0.55386413 |
| H   | -0.03695581 | -0.89892406 | -2.21302214 |
| H   | 0.04565985  | -2.58335446 | -1.68041100 |
| H   | -2.87771744 | 1.66057895  | 2.39978343  |
| H   | -3.76553653 | 0.35651368  | 1.58883035  |
| H   | -3.13377960 | 1.70140363  | 0.63672966  |
| H   | 3.84397786  | -0.41635084 | 1.51263999  |
| H   | 2.97629706  | 1.02995754  | 0.97162874  |
| H   | 3.88699396  | 0.05284002  | -0.19914196 |
| H   | -2.35983874 | -2.58954371 | -1.18807902 |
| N   | 2.08645013  | -0.80497127 | 0.48526918  |
| C   | 2.23449373  | -2.22677071 | 0.79222559  |
| H   | 2.02105060  | -2.41705627 | 1.84379785  |
| H   | 1.59145227  | -2.83518590 | 0.16640397  |
| H   | 3.26354116  | -2.50573357 | 0.58239546  |
| F   | 2.69867976  | 2.39160601  | -1.31372367 |
| H   | 2.05215078  | 1.80658753  | -0.90639682 |

F -1.00472704 2.45787420 -0.77608470  
H -0.31695883 1.80701314 -0.59118706

1 4 1.0 7 1.0 8 1.5  
2 8 2.0  
3 10 2.0  
4 5 1.0 14 1.0 15 1.0  
5 6 1.0 12 1.0 24 1.0  
6 7 1.0 16 1.0 17 1.0  
7 10 1.0 13 1.0  
8 9 1.0  
9 18 1.0 19 1.0 20 1.0  
10 25 1.5  
11 21 1.0 22 1.0 23 1.0 25 1.0  
12  
13  
14  
15  
16  
17  
18  
19  
20  
21  
22  
23  
24  
25 26 1.0  
26 27 1.0 28 1.0 29 1.0  
27  
28  
29  
30 31 1.0  
31  
32 33 1.0  
33

### Ac-Pro-NMe2-exo-PPII-HFHFdonor-HFHFacceptor

M062X/juncppVTZ/H2O optimized

0 1  
N -1.18780188 0.92201650 -0.25073359  
O -1.27685313 -1.27369804 -0.69264789  
O 0.87953900 -0.12353908 1.20528242  
C -1.75722875 2.21400767 0.16889275  
C -0.88174442 3.21453006 -0.57263169  
C 0.49292592 2.55097669 -0.54765830  
C 0.17668577 1.05773826 -0.76097109  
C -1.82907991 -0.23251794 -0.24527285  
C -3.21995642 -0.27871396 0.30112050  
C 1.15618992 0.19439422 0.02016228  
C 3.22646093 -0.98402797 0.23672475  
H -0.88254266 4.19100777 -0.09695135  
H 0.18397694 0.78636643 -1.81436726  
H -1.66374642 2.31310909 1.25155887  
H -2.80528561 2.27260604 -0.10833711  
H 0.95365344 2.68468754 0.43218265  
H 1.17558086 2.92950147 -1.30308969  
H -3.51488453 -1.31220856 0.45235044  
H -3.90088635 0.18378726 -0.41495046  
H -3.27726800 0.26819575 1.23900434  
H 3.97212829 -1.37579845 -0.44747538  
H 2.69184580 -1.81029251 0.69796021  
H 3.71816424 -0.39585056 1.01072730

|   |             |             |             |
|---|-------------|-------------|-------------|
| H | -1.23133575 | 3.32305831  | -1.59874522 |
| N | 2.29907420  | -0.15300393 | -0.52969458 |
| C | 2.76102249  | 0.25406330  | -1.85320453 |
| H | 2.81434503  | -0.61844948 | -2.50048055 |
| H | 2.10447461  | 0.99059127  | -2.29779042 |
| H | 3.75047094  | 0.69517407  | -1.74844018 |
| F | 2.16402972  | -0.95463254 | 3.20836479  |
| H | 1.73797934  | -0.65464591 | 2.40589436  |
| F | -1.13627763 | 0.20959967  | 2.63687359  |
| H | -0.38838906 | 0.12168188  | 2.03659835  |
| F | -2.45184437 | -3.45782975 | -0.49484174 |
| H | -2.00026400 | -2.60670416 | -0.57040510 |
| F | 0.46827506  | -1.64684059 | -2.45811001 |
| H | -0.18770863 | -1.48638143 | -1.77687358 |

1 4 1.0 7 1.0 8 1.5  
 2 8 2.0  
 3 10 2.0  
 4 5 1.0 14 1.0 15 1.0  
 5 6 1.0 12 1.0 24 1.0  
 6 7 1.0 16 1.0 17 1.0  
 7 10 1.0 13 1.0  
 8 9 1.0  
 9 18 1.0 19 1.0 20 1.0  
 10 25 1.5  
 11 21 1.0 22 1.0 23 1.0 25 1.0  
 12  
 13  
 14  
 15  
 16  
 17  
 18  
 19  
 20  
 21  
 22  
 23  
 24  
 25 26 1.0  
 26 27 1.0 28 1.0 29 1.0  
 27  
 28  
 29  
 30 31 1.0  
 31  
 32 33 1.0  
 33  
 34 35 1.0  
 35  
 36 37 1.0  
 37

#### Ac-Pro-NMe2-exo-PPII-HFHFdonor

M062X/juncppVTZ/H2O optimized

|   |   |             |             |
|---|---|-------------|-------------|
| O | 1 |             |             |
| N |   | -0.90689099 | 1.07532329  |
| O |   | -1.47234534 | -1.08470963 |
| O |   | 0.65902929  | -0.15111801 |
| C |   | -1.18256867 | 2.49173133  |
| C |   | -0.08497621 | 3.19049014  |
| C |   | 1.11149722  | 2.25893405  |
| C |   | 0.49481700  | 0.84554887  |
| C |   | -1.78438041 | 0.09803600  |
| C |   | -3.17444743 | 0.41280944  |

|   |             |             |             |
|---|-------------|-------------|-------------|
| C | 1.16428834  | -0.05211861 | 0.64776425  |
| C | 3.00507929  | -1.50041714 | 1.25600203  |
| H | 0.10514525  | 4.19651533  | -0.19808500 |
| H | 0.53654626  | 0.39793459  | -1.39254023 |
| H | -1.08863044 | 2.68101354  | 1.29862935  |
| H | -2.18399117 | 2.75701521  | -0.09760705 |
| H | 1.57162575  | 2.43330146  | 0.59603501  |
| H | 1.87375288  | 2.38201893  | -1.14147344 |
| H | -3.70667190 | -0.51077991 | 0.69766065  |
| H | -3.70020244 | 0.95974070  | -0.28921588 |
| H | -3.15589577 | 1.03480817  | 1.38678667  |
| H | 3.11044336  | -2.49793070 | 0.82647341  |
| H | 2.43095741  | -1.55604303 | 2.17292319  |
| H | 3.99984998  | -1.10664371 | 1.46766525  |
| H | -0.36657460 | 3.24391984  | -1.61290957 |
| N | 2.32401865  | -0.63632834 | 0.30638866  |
| C | 2.96676887  | -0.56128892 | -0.99473306 |
| H | 2.88492710  | -1.52082168 | -1.50606039 |
| H | 2.53201881  | 0.20771735  | -1.62131965 |
| H | 4.02075344  | -0.32338752 | -0.85059740 |
| F | -3.10210090 | -2.92098490 | 0.03632884  |
| H | -2.47119367 | -2.19406476 | -0.08507612 |
| F | 0.36990398  | -2.10110072 | -1.61494904 |
| H | -0.31292128 | -1.67423777 | -1.08677258 |

1 4 1.0 7 1.0 8 1.5  
 2 8 2.0  
 3 10 2.0  
 4 5 1.0 14 1.0 15 1.0  
 5 6 1.0 12 1.0 24 1.0  
 6 7 1.0 16 1.0 17 1.0  
 7 10 1.0 13 1.0  
 8 9 1.0  
 9 18 1.0 19 1.0 20 1.0  
 10 25 1.5  
 11 21 1.0 22 1.0 23 1.0 25 1.0  
 12  
 13  
 14  
 15  
 16  
 17  
 18  
 19  
 20  
 21  
 22  
 23  
 24  
 25 26 1.0  
 26 27 1.0 28 1.0 29 1.0  
 27  
 28  
 29  
 30 31 1.0  
 31  
 32 33 1.0  
 33

#### Ac-Pro-NMe2-exo-PPII-HFtrans

M062X/junccpVTZ/H2O optimized

|     |             |             |             |
|-----|-------------|-------------|-------------|
| 0 1 |             |             |             |
| N   | -1.55449570 | -0.02300358 | -0.07642740 |
| O   | -0.81300051 | -1.27479186 | -1.77992147 |
| O   | 0.90954918  | -0.80291422 | 0.79282304  |



|   |             |             |             |
|---|-------------|-------------|-------------|
| C | -2.48637828 | 0.36897920  | 0.98021222  |
| C | -2.18489025 | 1.85409989  | 1.14336222  |
| C | -0.67398724 | 1.92168366  | 0.91629569  |
| C | -0.43220631 | 0.89250169  | -0.20376970 |
| C | -1.65654801 | -1.07708183 | -0.90610077 |
| C | -2.84550332 | -1.98058845 | -0.71128228 |
| C | 0.88561681  | 0.15691436  | 0.00153763  |
| C | 3.20943252  | -0.16735008 | -0.52068334 |
| H | -2.48177896 | 2.23605519  | 2.11652889  |
| H | -0.45869906 | 1.34804958  | -1.19225685 |
| H | -2.27459589 | -0.18173642 | 1.90037539  |
| H | -3.51384739 | 0.17475963  | 0.68347347  |
| H | -0.14913142 | 1.60280443  | 1.81781721  |
| H | -0.31992522 | 2.91270654  | 0.64419760  |
| H | -2.72882670 | -2.85509380 | -1.34268237 |
| H | -3.76155676 | -1.45776933 | -0.98789936 |
| H | -2.93791547 | -2.28438811 | 0.33078057  |
| H | 3.83013591  | 0.06067873  | -1.38234391 |
| H | 2.99647863  | -1.23266364 | -0.50593347 |
| H | 3.74537255  | 0.09974829  | 0.39031342  |
| H | -2.70671875 | 2.42004049  | 0.37165748  |
| N | 1.96602206  | 0.58662239  | -0.63923420 |
| C | 1.99903258  | 1.78236295  | -1.47610733 |
| H | 1.80314392  | 1.53575010  | -2.52015098 |
| H | 1.28388496  | 2.52254697  | -1.13370083 |
| H | 2.98999004  | 2.22191085  | -1.39672676 |
| F | 2.68124954  | -1.94332419 | 2.03046371  |
| H | 2.01225892  | -1.46629327 | 1.49800955  |

1 4 1.0 7 1.0 8 1.5  
2 8 2.0  
3 10 2.0  
4 5 1.0 14 1.0 15 1.0  
5 6 1.0 12 1.0 24 1.0  
6 7 1.0 16 1.0 17 1.0  
7 10 1.0 13 1.0  
8 9 1.0  
9 18 1.0 19 1.0 20 1.0  
10 25 1.5  
11 21 1.0 22 1.0 23 1.0 25 1.0  
12  
13  
14  
15  
16  
17  
18  
19  
20  
21  
22  
23  
24  
25 26 1.0  
26 27 1.0 28 1.0 29 1.0  
27  
28  
29  
30 31 1.0  
31

**Ac-Pro-NMe2-exo-PPH-thioureaacceptor**

M062X/juncppVTZ/H2O optimized

0 1 0 1 0 1

|               |             |             |             |
|---------------|-------------|-------------|-------------|
| N(Fragment=1) | -0.36185257 | 1.29485320  | 0.42296002  |
| O(Fragment=1) | -0.28602653 | -0.16709925 | 2.11919582  |
| O(Fragment=1) | -0.64471792 | -1.16567537 | -0.80608375 |
| C(Fragment=1) | 0.08175489  | 2.46702634  | -0.33675803 |
| C(Fragment=1) | -1.21257363 | 2.95927258  | -0.97674468 |
| C(Fragment=1) | -1.98188480 | 1.66346739  | -1.23225067 |
| C(Fragment=1) | -1.68016404 | 0.82637486  | 0.02038184  |
| C(Fragment=1) | 0.24612969  | 0.74971211  | 1.49250498  |
| C(Fragment=1) | 1.58894940  | 1.31629713  | 1.86991380  |
| C(Fragment=1) | -1.65754172 | -0.66464924 | -0.30271038 |
| C(Fragment=1) | -2.81580070 | -2.79212047 | -0.33985692 |
| H(Fragment=1) | -1.03420446 | 3.53077915  | -1.88379124 |
| H(Fragment=1) | -2.38852862 | 1.03340562  | 0.82119126  |
| H(Fragment=1) | 0.81483835  | 2.17498427  | -1.09271808 |
| H(Fragment=1) | 0.53549746  | 3.20457713  | 0.32070920  |
| H(Fragment=1) | -1.57313253 | 1.15579573  | -2.10778972 |
| H(Fragment=1) | -3.04836110 | 1.81055308  | -1.38298955 |
| H(Fragment=1) | 2.05865469  | 0.65282578  | 2.58909321  |
| H(Fragment=1) | 1.46070121  | 2.30196289  | 2.31989788  |
| H(Fragment=1) | 2.23106889  | 1.42836239  | 0.99569633  |
| H(Fragment=1) | -3.06865953 | -3.32303217 | 0.57805362  |
| H(Fragment=1) | -1.84705602 | -3.12127821 | -0.69537265 |
| H(Fragment=1) | -3.57503556 | -3.00890542 | -1.09112783 |
| H(Fragment=1) | -1.75890713 | 3.58568664  | -0.27150480 |
| N(Fragment=1) | -2.77473051 | -1.36087228 | -0.07663674 |
| C(Fragment=1) | -3.98083686 | -0.78312628 | 0.50807400  |
| H(Fragment=1) | -3.87187208 | -0.64032711 | 1.58392998  |
| H(Fragment=1) | -4.23624773 | 0.16315553  | 0.03839308  |
| H(Fragment=1) | -4.80011623 | -1.47438925 | 0.33148766  |
| C(Fragment=2) | 2.71772338  | -0.85982079 | -0.48461108 |
| N(Fragment=2) | 2.01957949  | -1.60038986 | 0.38019265  |
| H(Fragment=2) | 2.49578952  | -2.00559011 | 1.16578924  |
| H(Fragment=2) | 1.00797393  | -1.64023002 | 0.32411871  |
| N(Fragment=2) | 2.01281316  | -0.26502572 | -1.45032432 |
| H(Fragment=2) | 2.49813233  | 0.28227508  | -2.13779313 |
| H(Fragment=2) | 1.00282260  | -0.37618858 | -1.48352671 |
| S(Fragment=2) | 4.40233732  | -0.67792403 | -0.35422760 |

1 4 1.0 7 1.0 8 1.5  
2 8 2.0  
3 10 2.0  
4 5 1.0 14 1.0 15 1.0  
5 6 1.0 12 1.0 24 1.0  
6 7 1.0 16 1.0 17 1.0  
7 10 1.0 13 1.0  
8 9 1.0  
9 18 1.0 19 1.0 20 1.0  
10 25 1.5  
11 21 1.0 22 1.0 23 1.0 25 1.0  
12  
13  
14  
15  
16  
17  
18  
19  
20  
21  
22  
23  
24  
25 26 1.0  
26 27 1.0 28 1.0 29 1.0  
27  
28  
29

30 31 1.5 34 1.5 37 1.0  
31 32 1.0 33 1.0  
32  
33  
34 35 1.0 36 1.0  
35  
36  
37

**Ac-Pro-NMe2-exo-PPil-ureaacceptor**

M062X/juncppVTZ/H2O optimized

0 1 0 1 0 1

|               |             |             |             |
|---------------|-------------|-------------|-------------|
| N(Fragment=1) | 0.03647567  | 1.25596789  | 0.41505827  |
| O(Fragment=1) | 0.11406025  | -0.24445013 | 2.07810404  |
| O(Fragment=1) | -0.48638502 | -1.13790514 | -0.84312147 |
| C(Fragment=1) | 0.52009329  | 2.40115297  | -0.35978339 |
| C(Fragment=1) | -0.77239871 | 3.01622024  | -0.88724992 |
| C(Fragment=1) | -1.66483391 | 1.79570270  | -1.10911623 |
| C(Fragment=1) | -1.33536724 | 0.89390280  | 0.09116665  |
| C(Fragment=1) | 0.67138787  | 0.64169959  | 1.42983124  |
| C(Fragment=1) | 2.07659654  | 1.09668202  | 1.72377585  |
| C(Fragment=1) | -1.43688499 | -0.58230722 | -0.28362095 |
| C(Fragment=1) | -2.75041788 | -2.61747523 | -0.33449965 |
| H(Fragment=1) | -0.61534362 | 3.59483659  | -1.79377798 |
| H(Fragment=1) | -1.97015204 | 1.11506099  | 0.94808679  |
| H(Fragment=1) | 1.16250438  | 2.06436889  | -1.17715921 |
| H(Fragment=1) | 1.08771041  | 3.08242007  | 0.26929762  |
| H(Fragment=1) | -1.37405771 | 1.28584879  | -2.02919165 |
| H(Fragment=1) | -2.72377243 | 2.03447609  | -1.16632542 |
| H(Fragment=1) | 2.54578726  | 0.37765851  | 2.38789409  |
| H(Fragment=1) | 2.05222800  | 2.07241723  | 2.21161637  |
| H(Fragment=1) | 2.66099761  | 1.19553330  | 0.80906147  |
| H(Fragment=1) | -3.04032282 | -3.14981732 | 0.57159541  |
| H(Fragment=1) | -1.81116777 | -3.01148645 | -0.70353965 |
| H(Fragment=1) | -3.52672522 | -2.75799732 | -1.08672609 |
| H(Fragment=1) | -1.20747159 | 3.66729796  | -0.12895418 |
| N(Fragment=1) | -2.59622835 | -1.20164261 | -0.03533101 |
| C(Fragment=1) | -3.73843024 | -0.55896647 | 0.60505744  |
| H(Fragment=1) | -3.61912178 | -0.52256553 | 1.68888764  |
| H(Fragment=1) | -3.89682153 | 0.44511456  | 0.22191916  |
| H(Fragment=1) | -4.62434483 | -1.14407267 | 0.37264021  |
| C(Fragment=2) | 2.96025998  | -1.12622838 | -0.59353116 |
| N(Fragment=2) | 2.20634476  | -1.92016586 | 0.22116282  |
| H(Fragment=2) | 2.64508522  | -2.20754545 | 1.07923967  |
| H(Fragment=2) | 1.20305531  | -1.79009007 | 0.23125511  |
| N(Fragment=2) | 2.26469382  | -0.49534132 | -1.57406746 |
| H(Fragment=2) | 2.76604023  | 0.15534193  | -2.15158443 |
| H(Fragment=2) | 1.25255727  | -0.47487408 | -1.53821165 |
| O(Fragment=1) | 4.18161306  | -1.02588861 | -0.47197768 |

1 4 1.0 7 1.0 8 1.5  
2 8 2.0  
3 10 2.0  
4 5 1.0 14 1.0 15 1.0  
5 6 1.0 12 1.0 24 1.0  
6 7 1.0 16 1.0 17 1.0  
7 10 1.0 13 1.0  
8 9 1.0  
9 18 1.0 19 1.0 20 1.0  
10 25 1.5  
11 21 1.0 22 1.0 23 1.0 25 1.0  
12  
13  
14  
15

16  
17  
18  
19  
20  
21  
22  
23  
24  
25 26 1.0  
26 27 1.0 28 1.0 29 1.0  
27  
28  
29  
30 31 1.5 34 1.5 37 2.0  
31 32 1.0 33 1.0  
32  
33  
34 35 1.0 36 1.0  
35  
36  
37

**Ac-Pro-NMe2-trans-endo-alpha**

optimized M062X/juncppVTZ/H2O

0 1  
N -1.14781491 0.10081904 -0.21697358  
O -0.72574282 -1.79686997 -1.34181555  
O 2.24351443 0.66314331 -1.35703001  
C -1.92183305 0.94514712 0.70010738  
C -1.02647526 2.16827001 0.89272259  
C -0.26481991 2.26537341 -0.42959054  
C -0.03495839 0.80081583 -0.83582312  
C -1.43262751 -1.17314756 -0.55232538  
C -2.63700276 -1.78653501 0.11179600  
C 1.39054497 0.31451306 -0.53939362  
C 3.05784884 -0.98338391 0.60655194  
H -0.09631201 0.68496824 -1.91686763  
H -2.12692573 0.42150876 1.63367594  
H -2.87550386 1.22114889 0.24587364  
H 0.66744912 2.81916322 -0.35570520  
H -0.88719857 2.74467796 -1.18423925  
H -2.82244350 -2.76166555 -0.32607904  
H -3.51579523 -1.15305160 -0.00350487  
H -2.45132592 -1.90116054 1.18115726  
H 3.68527478 -0.35584811 1.24228720  
H 3.49513162 -1.03492672 -0.38389888  
H 3.00967912 -1.98176841 1.03794622  
H -1.60429607 3.06168907 1.11363362  
H -0.33225057 2.00866865 1.71767630  
N 1.70394674 -0.45010130 0.52213238  
C 0.84889479 -0.80865606 1.64536384  
H 0.09097180 -0.06157225 1.83516888  
H 0.37450912 -1.77992909 1.48839930  
H 1.47650987 -0.87149476 2.53267487

1 4 1.0 7 1.0 8 1.5  
2 8 2.0  
3 10 2.0  
4 5 1.0 13 1.0 14 1.0  
5 6 1.0 23 1.0 24 1.0  
6 7 1.0 15 1.0 16 1.0  
7 10 1.0 12 1.0  
8 9 1.0  
9 17 1.0 18 1.0 19 1.0

10 25 1.5  
11 20 1.0 21 1.0 22 1.0 25 1.0  
12  
13  
14  
15  
16  
17  
18  
19  
20  
21  
22  
23  
24  
25 26 1.0  
26 27 1.0 28 1.0 29 1.0  
27  
28  
29

### Ac-Pro-NMe2-trans-endo-PPII

optimized M062X/juncppVTZ/H2O

0 1  
N -1.34118578 0.11403892 -0.22286841  
O -1.12253088 -2.05650864 -0.75967188  
O 0.63907698 -0.43198679 1.54763131  
C -2.04707319 1.26725533 0.34323341  
C -0.93897163 2.30589237 0.50679075  
C 0.04477448 1.95346703 -0.60992436  
C 0.02284649 0.41626035 -0.61252522  
C -1.81647228 -1.13986919 -0.31978248  
C -3.23449004 -1.35617959 0.14046620  
C 1.01397403 -0.15111246 0.41380572  
C 3.28887994 -0.84115686 0.90894913  
H 0.21994227 -0.01116363 -1.59225378  
H -2.51925035 1.00934599 1.28950831  
H -2.81887889 1.61424051 -0.34747555  
H 1.04017538 2.35917885 -0.44263813  
H -0.31987130 2.31693496 -1.57058844  
H -3.54774534 -2.35615349 -0.14081120  
H -3.90868739 -0.61918291 -0.29398520  
H -3.28848019 -1.25441642 1.22523412  
H 3.76555817 -1.69713407 0.42903956  
H 2.80710330 -1.16048678 1.82554653  
H 4.05615860 -0.10007026 1.13742928  
H -1.31488291 3.32297455 0.43467978  
H -0.45907082 2.17923155 1.47638797  
N 2.29546437 -0.27288815 0.01356865  
C 2.78223784 0.04718695 -1.31914982  
H 2.81504916 -0.84248870 -1.95141547  
H 2.17385457 0.80521593 -1.80011243  
H 3.79247311 0.44341829 -1.22830238

1 4 1.0 7 1.0 8 1.5  
2 8 2.0  
3 10 2.0  
4 5 1.0 13 1.0 14 1.0  
5 6 1.0 23 1.0 24 1.0  
6 7 1.0 15 1.0 16 1.0  
7 10 1.0 12 1.0  
8 9 1.0  
9 17 1.0 18 1.0 19 1.0  
10 25 1.5  
11 20 1.0 21 1.0 22 1.0 25 1.0

12  
13  
14  
15  
16  
17  
18  
19  
20  
21  
22  
23  
24  
25 26 1.0  
26 27 1.0 28 1.0 29 1.0  
27  
28  
29

### Ac-Pro-NMe2-trans-exo-alpha

optimized M062X/juncppVTZ/H2O

0 1  
C 2.16804113 -0.59258437 0.61025825  
H 2.00065692 -0.44857754 1.68170743  
H 3.15311487 -0.20405209 0.36372738  
C 1.99161451 -2.05542356 0.21189383  
H 2.35773892 -2.73800811 0.97410215  
C 0.48581546 -2.17355382 -0.02619652  
H -0.04317080 -2.26161018 0.92354958  
H 0.20920983 -3.02190942 -0.64603609  
C 0.14006210 -0.84339301 -0.71058224  
H 0.27979750 -0.92824459 -1.78926324  
C 1.08312511 1.39696075 -0.46855580  
C 2.15999557 2.26364773 0.13037546  
H 2.25823585 2.08373519 1.20068319  
H 1.91143515 3.30446919 -0.04873911  
H 3.12139477 2.03971262 -0.33318843  
C -1.32700833 -0.44710811 -0.56418255  
C -3.19125737 0.50301085 0.57343117  
H -3.85211534 -0.34144561 0.38498525  
H -3.35743544 1.24633771 -0.20638674  
H -3.42948301 0.93881179 1.53857775  
N 1.12892522 0.08513804 -0.16946501  
O 0.19470022 1.85375652 -1.18646492  
O -2.07506332 -0.67012937 -1.51517463  
H 2.53005740 -2.24977196 -0.71570114  
N -1.79735395 0.07451496 0.58380273  
C -1.00636710 0.38405627 1.76489073  
H -0.21070562 -0.33780897 1.90898119  
H -0.57429740 1.38651086 1.71318578  
H -1.65665415 0.33158654 2.63457340

1 2 1.0 3 1.0 4 1.0 21 1.0  
2  
3  
4 5 1.0 6 1.0 24 1.0  
5  
6 7 1.0 8 1.0 9 1.0  
7  
8  
9 10 1.0 16 1.0 21 1.0  
10  
11 12 1.0 21 1.5 22 2.0  
12 13 1.0 14 1.0 15 1.0  
13

14  
15  
16 23 2.0 25 1.5  
17 18 1.0 19 1.0 20 1.0 25 1.0  
18  
19  
20  
21  
22  
23  
24  
25 26 1.0  
26 27 1.0 28 1.0 29 1.0  
27  
28  
29

### Ac-Pro-NMe2-trans-exo-PPII

optimized M062X/juncppVTZ/H2O

|   |   |             |             |             |
|---|---|-------------|-------------|-------------|
| O | 1 |             |             |             |
| N |   | -1.31435744 | 0.00651903  | -0.08182152 |
| O |   | -0.63224618 | -1.99972068 | -0.81389065 |
| O |   | 0.80928757  | -0.48855813 | 1.60125889  |
| C |   | -2.28652552 | 0.97565649  | 0.42201928  |
| C |   | -1.70845129 | 2.29911413  | -0.06643130 |
| C |   | -0.20095161 | 2.07604933  | 0.05566275  |
| C |   | -0.01622491 | 0.60421979  | -0.35662148 |
| C |   | -1.52278460 | -1.29616772 | -0.33594419 |
| C |   | -2.89184288 | -1.84068290 | -0.01929634 |
| C |   | 1.07617093  | -0.06183550 | 0.48225460  |
| C |   | 3.40003353  | -0.73376886 | 0.67617311  |
| H |   | -2.05806813 | 3.14752781  | 0.51631255  |
| H |   | 0.19627274  | 0.50384758  | -1.41943347 |
| H |   | -2.32987947 | 0.94201376  | 1.51391576  |
| H |   | -3.27818978 | 0.77339323  | 0.02540865  |
| H |   | 0.10734991  | 2.19846699  | 1.09490813  |
| H |   | 0.38919317  | 2.75034556  | -0.56013784 |
| H |   | -2.87071413 | -2.92063199 | -0.12226590 |
| H |   | -3.62658006 | -1.42971895 | -0.71264535 |
| H |   | -3.19905922 | -1.56932723 | 0.98992584  |
| H |   | 3.80573942  | -1.54914092 | 0.07555291  |
| H |   | 3.02292788  | -1.12721140 | 1.61261865  |
| H |   | 4.19758782  | -0.01736741 | 0.87487815  |
| H |   | -1.98275300 | 2.45530544  | -1.10985953 |
| N |   | 2.31524762  | -0.08612862 | -0.04310855 |
| C |   | 2.64311376  | 0.41866017  | -1.37018841 |
| H |   | 2.35532173  | -0.28598627 | -2.15273413 |
| H |   | 2.17361517  | 1.38063563  | -1.55944249 |
| H |   | 3.71944912  | 0.56387603  | -1.41720550 |

1 4 1.0 7 1.0 8 1.5  
2 8 2.0  
3 10 2.0  
4 5 1.0 14 1.0 15 1.0  
5 6 1.0 12 1.0 24 1.0  
6 7 1.0 16 1.0 17 1.0  
7 10 1.0 13 1.0  
8 9 1.0  
9 18 1.0 19 1.0 20 1.0  
10 25 1.5  
11 21 1.0 22 1.0 23 1.0 25 1.0  
12  
13  
14

15  
16  
17  
18  
19  
20  
21  
22  
23  
24  
25 26 1.0  
26 27 1.0 28 1.0 29 1.0  
27  
28  
29



# Coordinates of structures of Ac-Ala-NMe<sub>2</sub> as a function of ring pucker, main chain conformation, and explicit solvation

Ac-Ala-NMe<sub>2</sub>-alpha-H<sub>2</sub>OH<sub>2</sub>OacceptorH<sub>2</sub>OH<sub>2</sub>O

optimized M062X/juncppVTZ/H<sub>2</sub>O

```
0 1
N      -2.00300000  -0.80700000  0.16200000
O      -1.17600000  -0.65300000  2.24800000
O       1.39400000  0.15600000  0.04700000
C      -0.78900000  -1.13000000  -1.93800000
C      -0.69000000  -0.86100000  -0.44000000
C      -2.14600000  -0.69600000  1.49600000
C      -3.56000000  -0.61500000  2.00800000
C       0.18800000  0.36100000  -0.16200000
C       0.58000000  2.69000000  0.21500000
H      -0.13300000  -1.67300000  0.02800000
H      -1.32900000  -0.33800000  -2.45500000
H       0.21100000  -1.20600000  -2.36200000
H      -3.70000000  0.35500000  2.48400000
H      -3.70200000  -1.38300000  2.76700000
H      -4.29900000  -0.73900000  1.22100000
H      -0.02700000  3.53800000  0.52000000
H       1.21100000  2.98400000  -0.62600000
H       1.21600000  2.38500000  1.04100000
N      -0.31100000  1.59700000  -0.16000000
C      -1.65100000  1.98400000  -0.58500000
H      -1.56800000  2.90700000  -1.15600000
H      -2.10300000  1.23400000  -1.22200000
H      -2.29700000  2.16100000  0.27600000
H       2.98700000  1.10900000  0.05100000
H       2.38300000  -1.38000000  -0.20600000
H      -2.81700000  -0.76600000  -0.44100000
H      -1.31000000  -2.07100000  -2.10600000
O       2.98200000  -2.12900000  -0.35800000
O       3.87600000  1.49700000  0.05600000
H       3.86800000  -1.78000000  -0.19000000
H       4.48000000  0.74400000  0.10100000
O       5.57500000  -0.87900000  0.15000000
H       6.25300000  -0.96100000  -0.52800000
H       6.01500000  -1.08100000  0.98100000
O      -4.08900000  -0.36400000  -1.84700000
H      -4.92600000  0.07100000  -1.65700000
H      -4.30400000  -1.06900000  -2.46600000
```

```
1 5 1.0 6 1.5 26 1.0
2 6 2.0
3 8 2.0
4 5 1.0 11 1.0 12 1.0 27 1.0
5 8 1.0 10 1.0
6 7 1.0
7 13 1.0 14 1.0 15 1.0
8 19 1.5
9 16 1.0 17 1.0 18 1.0 19 1.0
10
11
12
13
14
15
16
17
18
19 20 1.0
20 21 1.0 22 1.0 23 1.0
```

21  
22  
23  
24 29 1.0  
25 28 1.0  
26  
27  
28 30 1.0  
29 31 1.0  
30  
31  
32 33 1.0 34 1.0  
33  
34  
35 36 1.0 37 1.0  
36  
37

**Ac-Ala-NMe2-alpha-HFdonor-HFHFacceptor**

optimized M062X/juncppVTZ/H2O

0 1  
N -1.33467400 -1.06883700 0.87438000  
O -1.64594500 0.97165400 0.03951800  
O 1.71257000 0.59701500 0.22684400  
C 0.71082200 -1.96372300 1.90031400  
C 0.05062500 -0.78416700 1.19709100  
C -2.12196200 -0.13768500 0.33186400  
C -3.55655300 -0.48016400 0.07718900  
C 0.87973500 -0.32265300 0.00109000  
C 1.49866200 -0.25649700 -2.31464900  
H 0.06426300 0.07516700 1.86758100  
H 0.73136200 -2.85320300 1.27308100  
H 1.73363100 -1.70082200 2.16186800  
H -3.73633100 -0.43007200 -0.99618900  
H -4.18234200 0.27103800 0.55599300  
H -3.82071500 -1.46709500 0.44455600  
H 0.96468100 -0.49364800 -3.23027300  
H 2.50869600 -0.66154500 -2.36837000  
H 1.54620200 0.82134200 -2.19376100  
N 0.76448400 -0.85189700 -1.19796100  
C -0.00974200 -2.04453000 -1.53373300  
H 0.58845500 -2.64375900 -2.21658300  
H -0.22402000 -2.64159300 -0.65824200  
H -0.94100900 -1.76563400 -2.02671700  
F 3.90461000 1.17056100 -0.85625100  
H 3.05253800 0.92877300 -0.48745600  
F 1.78144200 1.79420600 2.40191200  
H 1.75201800 1.32877100 1.55437600  
F -3.15065300 2.61913100 -0.97640500  
H -2.54940800 1.96268600 -0.56980500  
H -1.72542400 -1.96233300 1.13026700  
H 0.16762600 -2.19085100 2.81555100

1 5 1.0 6 1.5 30 1.0  
2 6 2.0  
3 8 2.0  
4 5 1.0 11 1.0 12 1.0 31 1.0  
5 8 1.0 10 1.0  
6 7 1.0  
7 13 1.0 14 1.0 15 1.0  
8 19 2.0  
9 16 1.0 17 1.0 18 1.0 19 1.0  
10  
11

12  
 13  
 14  
 15  
 16  
 17  
 18  
 19 20 1.0  
 20 21 1.0 22 1.0 23 1.0  
 21  
 22  
 23  
 24 25 1.0  
 25  
 26 27 1.0  
 27  
 28 29 1.0  
 29  
 30  
 31

**Ac-Ala-NMe2-alpha-HFHAcceptor**

optimized M062X/juncppVTZ/H2O

0 1  
 N 1.85267209 -0.44730752 0.55837208  
 O 1.51747460 -0.44775634 -1.65616244  
 O -1.57802689 -0.42191778 -0.27534777  
 C 0.23541340 -0.99435581 2.32264201  
 C 0.48328946 -0.82238046 0.82835364  
 C 2.28914069 -0.31337335 -0.71396833  
 C 3.74472920 0.01491989 -0.90052243  
 C -0.54619069 0.12003321 0.21082177  
 C -1.36354247 2.24591157 -0.54416659  
 H 0.28727459 -1.77369038 0.33197159  
 H 0.40130176 -0.06901402 2.87197534  
 H -0.79100411 -1.31578194 2.48686898  
 H 3.82004587 0.91836366 -1.50284802  
 H 4.21303778 -0.79759433 -1.45373970  
 H 4.26877950 0.15974876 0.04024099  
 H -0.86485871 3.16535926 -0.83717023  
 H -2.22598338 2.48421400 0.07740406  
 H -1.69302495 1.71654161 -1.43297135  
 N -0.40247337 1.42819396 0.19560909  
 C 0.64669226 2.17448461 0.88548159  
 H 0.19645388 3.07864468 1.28862476  
 H 1.06328499 1.60635205 1.70549600  
 H 1.43882424 2.45026097 0.18915023  
 F -3.92748573 0.41326869 -0.50873398  
 H -3.00962578 0.14080550 -0.42281007  
 F -1.78538299 -2.87944605 -0.52602998  
 H -1.69366951 -1.91985173 -0.42717933  
 H 2.49698106 -0.34997419 1.32632845  
 H 0.90383747 -1.75903796 2.71389735

1 5 1.0 6 1.5 28 1.0  
 2 6 2.0  
 3 8 2.0  
 4 5 1.0 11 1.0 12 1.0 29 1.0  
 5 8 1.0 10 1.0  
 6 7 1.0  
 7 13 1.0 14 1.0 15 1.0  
 8 19 2.0  
 9 16 1.0 17 1.0 18 1.0 19 1.0  
 10  
 11

12  
13  
14  
15  
16  
17  
18  
19 20 1.0  
20 21 1.0 22 1.0 23 1.0  
21  
22  
23  
24 25 1.0  
25  
26 27 1.0  
27  
28  
29

**Ac-Ala-NMe2-alpha-HFHdonor-HFacceptor**

optimized M062X/juncppVTZ/H2O

0 1  
N 1.03502097 -1.36960952 -0.66080304  
O 1.63610592 0.69761902 -0.05000763  
O -1.80193391 0.72641965 -0.65586807  
C -0.96316351 -2.11271925 -1.87069982  
C -0.24516121 -0.94383925 -1.20829129  
C 1.89660994 -0.52844524 -0.11142311  
C 3.16931800 -1.06636643 0.45568646  
C -1.15158038 -0.23119112 -0.20062378  
C -1.99838151 0.20661344 2.00308599  
H -0.05702322 -0.17856740 -1.96039154  
H -1.17584235 -2.91230838 -1.16310881  
H -1.90343938 -1.76230886 -2.28986165  
H 3.20471045 -0.81565916 1.51550708  
H 4.00383035 -0.56638890 -0.03358576  
H 3.25787497 -2.14097178 0.33099653  
H -1.59029646 0.05206617 2.99840411  
H -3.05157020 -0.07476647 1.99697549  
H -1.90622731 1.25498032 1.73632932  
N -1.23473530 -0.61462319 1.06742881  
C -0.69387744 -1.84964046 1.62567612  
H -1.42878967 -2.24882424 2.32147690  
H -0.52571761 -2.59574990 0.85999649  
H 0.23392363 -1.65991832 2.16630076  
F -3.88604820 1.82111719 0.05241832  
H -3.05393639 1.37087992 -0.17910658  
F 3.24489460 2.11083011 1.23510925  
H 2.62157022 1.57028643 0.73569345  
F 0.86280269 2.24168497 -1.93081494  
H 1.08509695 1.65226996 -1.21891690  
H 1.28298680 -2.34690010 -0.70960748  
H -0.34995175 -2.50996022 -2.67735315

1 5 1.0 6 1.5 30 1.0  
2 6 2.0  
3 8 2.0  
4 5 1.0 11 1.0 12 1.0 31 1.0  
5 8 1.0 10 1.0  
6 7 1.0  
7 13 1.0 14 1.0 15 1.0  
8 19 2.0  
9 16 1.0 17 1.0 18 1.0 19 1.0  
10  
11

12  
13  
14  
15  
16  
17  
18  
19 20 1.0  
20 21 1.0 22 1.0 23 1.0  
21  
22  
23  
24 25 1.0  
25  
26 27 1.0  
27  
28 29 1.0  
29  
30  
31

**Ac-Ala-NMe2-alpha-HFHFDdonor-HFHFAcceptor**

optimized M062X/juncppVTZ/H2O

0 1  
N -1.23702879 -0.57472389 1.38841944  
O -1.74469603 0.71502548 -0.36818657  
O 1.77157071 0.39552964 -0.22555396  
C 0.89061652 -0.80982418 2.58842694  
C 0.16312391 -0.18069641 1.40570657  
C -2.10910239 -0.10059230 0.51086301  
C -3.52441072 -0.57400127 0.57529226  
C 0.90586578 -0.45806522 0.09895039  
C 1.32471106 -1.62042281 -1.95456684  
H 0.20608603 0.90421246 1.50789981  
H 0.89202766 -1.89707218 2.52926804  
H 1.92015098 -0.45922432 2.60241102  
H -3.79061206 -0.99643782 -0.39279555  
H -4.16672851 0.28801063 0.75174341  
H -3.67938044 -1.31362917 1.35460751  
H 0.71236223 -2.25933643 -2.58401734  
H 2.31907700 -2.05417694 -1.85290360  
H 1.40257148 -0.63714360 -2.40781681  
N 0.67329578 -1.51716809 -0.64803272  
C -0.12714293 -2.67639043 -0.25679899  
H 0.37528708 -3.56225831 -0.63766753  
H -0.19473146 -2.76826291 0.81925699  
H -1.12512033 -2.62176249 -0.69099301  
F 3.82858971 0.27633556 -1.67653206  
H 3.02807490 0.27817973 -1.15176173  
F 2.45402281 2.14186854 1.43115158  
H 2.15436429 1.51643898 0.76336831  
F -3.47410761 1.32468500 -2.07238472  
H -2.80259678 1.09990686 -1.42038147  
F -0.22507683 2.75815646 -0.21187162  
H -0.75282301 1.97040647 -0.27470751  
H -1.56777220 -1.21347797 2.09630414  
H 0.40807675 -0.50502429 3.51489389

1 5 1.0 6 1.5 32 1.0  
2 6 2.0  
3 8 2.0  
4 5 1.0 11 1.0 12 1.0 33 1.0  
5 8 1.0 10 1.0  
6 7 1.0  
7 13 1.0 14 1.0 15 1.0

8 19 2.0  
9 16 1.0 17 1.0 18 1.0 19 1.0  
10  
11  
12  
13  
14  
15  
16  
17  
18  
19 20 1.0  
20 21 1.0 22 1.0 23 1.0  
21  
22  
23  
24 25 1.0  
25  
26 27 1.0  
27  
28 29 1.0  
29  
30 31 1.0  
31  
32  
33

**Ac-Ala-NMe2-alpha-HFHFdonor**

optimized M062X/juncppVTZ/H2O

0 1  
N 0.12239532 -0.61348177 -1.37149500  
O 1.56049231 0.22259808 0.12879411  
O -1.59831947 1.72941430 0.64332304  
C -1.96787937 0.33419878 -2.22836622  
C -0.85016709 0.45941038 -1.20125182  
C 1.25437289 -0.67747707 -0.69191764  
C 2.15699048 -1.85002723 -0.90023865  
C -1.40515515 0.59147202 0.22626154  
C -2.07138562 -0.31315151 2.35048265  
H -0.33756474 1.40717965 -1.35924743  
H -2.51855470 -0.59911317 -2.12014184  
H -2.66391025 1.15976529 -2.09932432  
H 2.29113757 -2.35246656 0.05727656  
H 3.13023668 -1.48414827 -1.22406957  
H 1.76605607 -2.55232774 -1.62987939  
H -3.15839271 -0.25437352 2.43283481  
H -1.63706984 0.60162956 2.73916792  
H -1.71885035 -1.16221980 2.93253535  
N -1.66325034 -0.50085117 0.96527494  
C -1.71349413 -1.87532079 0.48878000  
H -2.57544788 -2.35979233 0.94527621  
H -1.84353878 -1.92544241 -0.58507699  
H -0.81541662 -2.42775356 0.77091060  
F 3.60977114 -0.16026813 1.49184999  
H 2.81559331 -0.00758521 0.96314777  
F 1.51377311 2.74787354 -0.17064344  
H 1.45677331 1.80547702 -0.04542214  
H -0.07926242 -1.35083257 -2.03029713  
H -1.55477670 0.38315895 -3.23444538

1 5 1.0 6 2.0 28 1.0  
2 6 2.0  
3 8 2.0  
4 5 1.0 11 1.0 12 1.0 29 1.0  
5 8 1.0 10 1.0

6 7 1.0  
7 13 1.0 14 1.0 15 1.0  
8 19 1.5  
9 16 1.0 17 1.0 18 1.0 19 1.0  
10  
11  
12  
13  
14  
15  
16  
17  
18  
19 20 1.0  
20 21 1.0 22 1.0 23 1.0  
21  
22  
23  
24 25 1.0  
25  
26 27 1.0  
27  
28  
29

**Ac-Ala-NMe2-alpha-HFtrans**

optimized M062X/juncppVTZ/H2O

0 1  
N -1.76256800 0.66558100 0.08478800  
O -1.44525600 -0.79213900 -1.59001600  
O 1.61709100 0.55686300 -0.89417200  
C -0.28413300 2.46633900 0.84507700  
C -0.47707500 1.29923300 -0.11583800  
C -2.17052200 -0.34977700 -0.70663600  
C -3.53911100 -0.91201800 -0.43334300  
C 0.71417100 0.34163600 -0.06173200  
C 1.89241500 -1.59669100 0.71344000  
H -0.43346200 1.67605700 -1.13782600  
H -0.30795100 2.14580500 1.88585500  
H 0.67619500 2.94009700 0.65303800  
H -3.43057200 -1.96023000 -0.15857600  
H -4.12204900 -0.86587300 -1.35116900  
H -4.06456400 -0.38514700 0.35861800  
H 1.60043900 -2.51350000 1.21801400  
H 2.79821900 -1.20342700 1.17529900  
H 2.09395200 -1.81128700 -0.33247900  
N 0.79175200 -0.64413800 0.82387000  
C -0.11233900 -0.85537000 1.94823700  
H 0.48581800 -1.15217400 2.80744500  
H -0.64546600 0.04953200 2.20622100  
H -0.82925300 -1.64668200 1.72548900  
F 3.98670600 -0.03219300 -1.02454400  
H 3.03115000 0.15983500 -0.93327800  
H -2.38217400 1.02519000 0.79254800  
H -1.07003100 3.20354100 0.68936500

1 5 1.0 6 1.5 26 1.0  
2 6 2.0  
3 8 2.0  
4 5 1.0 11 1.0 12 1.0 27 1.0  
5 8 1.0 10 1.0  
6 7 1.0  
7 13 1.0 14 1.0 15 1.0  
8 19 1.5  
9 16 1.0 17 1.0 18 1.0 19 1.0

10  
11  
12  
13  
14  
15  
16  
17  
18  
19 20 1.0  
20 21 1.0 22 1.0 23 1.0  
21  
22  
23  
24 25 1.0  
25  
26  
27

### Ac-Ala-NMe2-alpha

optimized M062X/juncppVTZ/H2O

0 1  
N -1.26415200 0.65114200 0.32888100  
O -1.46500900 -0.71031400 -1.44560000  
O 1.76823800 0.60031000 -1.49081200  
C 0.36054100 2.43542000 0.73257200  
C -0.07348300 1.29789500 -0.18368200  
C -1.89246900 -0.32053400 -0.36443900  
C -3.12837400 -0.90625600 0.26561800  
C 1.10157400 0.35627800 -0.48663500  
C 2.43183300 -1.60859100 -0.05324600  
H -0.30602800 1.70949200 -1.16582100  
H 0.61696700 2.07983600 1.73002500  
H 1.23368900 2.92698400 0.30878500  
H -2.94757100 -1.96262100 0.45948800  
H -3.94859600 -0.83210900 -0.44569400  
H -3.40560900 -0.41319700 1.19357100  
H 3.36849100 -1.38010500 0.45901900  
H 2.58994200 -1.55776800 -1.12458100  
H 2.11841700 -2.61416800 0.22402400  
N 1.38814100 -0.67131400 0.33265000  
C 0.78738300 -0.92835600 1.63241800  
H 1.56553200 -1.30630900 2.29423700  
H 0.38690800 -0.02523200 2.07490300  
H -0.00454700 -1.67694900 1.56378500  
H -1.64292000 0.95019400 1.21279700  
H -0.44046600 3.16804900 0.82040700

1 5 1.0 6 1.5 24 1.0  
2 6 2.0  
3 8 2.0  
4 5 1.0 11 1.0 12 1.0 25 1.0  
5 8 1.0 10 1.0  
6 7 1.0  
7 13 1.0 14 1.0 15 1.0  
8 19 1.5  
9 16 1.0 17 1.0 18 1.0 19 1.0  
10  
11  
12  
13  
14  
15  
16  
17



18  
19 20 1.0  
20 21 1.0 22 1.0 23 1.0  
21  
22  
23  
24  
25

### Ac-Ala-NMe2-alpha-ureaacceptor

optimized M062X/juncppVTZ/H2O

0 1 0 1 0 1

|               |             |             |             |
|---------------|-------------|-------------|-------------|
| N(Fragment=1) | 1.93191400  | -1.09727300 | 0.59927800  |
| O(Fragment=1) | 2.42141100  | -0.80802300 | -1.57121500 |
| O(Fragment=1) | -0.69055000 | 0.65236700  | -1.01562500 |
| C(Fragment=1) | -0.24930400 | -0.95413600 | 1.70678400  |
| C(Fragment=1) | 0.53175000  | -0.78451800 | 0.40919300  |
| C(Fragment=1) | 2.79214200  | -1.10426500 | -0.44098000 |
| C(Fragment=1) | 4.21786200  | -1.47868200 | -0.13728500 |
| C(Fragment=1) | 0.24997400  | 0.58850000  | -0.21162000 |
| C(Fragment=1) | 0.70904900  | 2.92748700  | -0.55822100 |
| H(Fragment=1) | 0.13005800  | -1.47367800 | -0.33462900 |
| H(Fragment=1) | 0.10609400  | -0.27967300 | 2.48500800  |
| H(Fragment=1) | -1.30284200 | -0.74575000 | 1.52566600  |
| H(Fragment=1) | 4.86056200  | -0.65081000 | -0.43222800 |
| H(Fragment=1) | 4.48531700  | -2.34242500 | -0.74341300 |
| H(Fragment=1) | 4.38318300  | -1.70784000 | 0.91205100  |
| H(Fragment=1) | 0.06485300  | 3.57161800  | 0.04238800  |
| H(Fragment=1) | 0.23499400  | 2.73509300  | -1.51357400 |
| H(Fragment=1) | 1.66174200  | 3.43047400  | -0.71520900 |
| N(Fragment=1) | 0.95883300  | 1.66804200  | 0.13092800  |
| C(Fragment=1) | 1.95282200  | 1.74403300  | 1.19305000  |
| H(Fragment=1) | 1.85400500  | 2.71723200  | 1.67103800  |
| H(Fragment=1) | 1.79523100  | 0.98415200  | 1.94747500  |
| H(Fragment=1) | 2.96372200  | 1.65226900  | 0.79251800  |
| C(Fragment=2) | -3.82364000 | -0.45676700 | -0.12000600 |
| N(Fragment=2) | -3.45660200 | 0.84021100  | 0.07253600  |
| H(Fragment=2) | -3.96015600 | 1.36023700  | 0.76876400  |
| H(Fragment=2) | -2.53507500 | 1.14821200  | -0.20348100 |
| N(Fragment=2) | -2.99738100 | -1.16749400 | -0.93433700 |
| H(Fragment=2) | -3.15905100 | -2.15695900 | -0.99579100 |
| H(Fragment=2) | -2.08246000 | -0.79658800 | -1.15835200 |
| O(Fragment=1) | -4.84883500 | -0.93274700 | 0.36775100  |
| H(Fragment=1) | 2.25871300  | -1.35393500 | 1.51662800  |
| H(Fragment=1) | -0.15636600 | -1.97872300 | 2.06352100  |

1 5 1.0 6 1.5 32 1.0  
2 6 2.0  
3 8 2.0  
4 5 1.0 11 1.0 12 1.0 33 1.0  
5 8 1.0 10 1.0  
6 7 1.0  
7 13 1.0 14 1.0 15 1.0  
8 19 1.5  
9 16 1.0 17 1.0 18 1.0 19 1.0  
10  
11  
12  
13  
14  
15  
16  
17  
18  
19 20 1.0

20 21 1.0 22 1.0 23 1.0  
21  
22  
23  
24 25 1.5 28 1.5 31 2.0  
25 26 1.0 27 1.0  
26  
27  
28 29 1.0 30 1.0  
29  
30  
31  
32  
33

**Ac-Ala-NMe2-beta-H2OH2OacceptorH2OH2O**

optimized M062X/juncppVTZ/H2O 4 H2O

0 1  
N -1.73300000 -0.64500000 -0.17900000  
O -3.97500000 -0.42700000 -0.34900000  
O 0.73700000 0.31600000 -0.30100000  
C -1.72500000 0.82400000 1.79600000  
C -1.54600000 0.71300000 0.27800000  
C -2.96600000 -1.12500000 -0.43000000  
C -3.03900000 -2.58200000 -0.80500000  
C -0.14300000 1.16900000 -0.09400000  
C 1.51800000 2.85800000 -0.39800000  
H -2.29500000 1.31900000 -0.22600000  
H -0.97900000 0.20900000 2.29900000  
H -1.61800000 1.85300000 2.13900000  
H -2.08300000 -2.96800000 -1.15100000  
H -3.79800000 -2.71000000 -1.57200000  
H -3.34700000 -3.14800000 0.07500000  
H 1.61800000 3.92400000 -0.21600000  
H 1.78400000 2.64200000 -1.43300000  
H 2.19600000 2.31300000 0.25500000  
N 0.13700000 2.47000000 -0.12800000  
C -0.81300000 3.55700000 0.06000000  
H -0.79600000 4.20700000 -0.81500000  
H -1.82100000 3.18600000 0.19500000  
H -0.53400000 4.14000000 0.93700000  
H 2.41200000 0.25300000 -1.17700000  
H 1.69500000 -0.70400000 0.92400000  
H -0.93900000 -1.27900000 -0.18500000  
H -2.71700000 0.46500000 2.06300000  
O 2.08500000 -1.45500000 1.40000000  
O 3.27100000 0.12600000 -1.60700000  
H 3.00800000 -1.50500000 1.11000000  
H 3.79300000 -0.41000000 -0.99600000  
O 4.72900000 -1.52600000 0.31700000  
H 5.04000000 -2.38200000 0.00400000  
H 5.46700000 -1.14100000 0.80000000  
O 0.22600000 -2.94800000 -0.00700000  
H -0.15300000 -3.65300000 0.52400000  
H 0.94200000 -2.56200000 0.53500000

1 5 1.0 6 1.5 26 1.0  
2 6 2.0  
3 8 2.0  
4 5 1.0 11 1.0 12 1.0 27 1.0  
5 8 1.0 10 1.0  
6 7 1.0  
7 13 1.0 14 1.0 15 1.0  
8 19 1.5  
9 16 1.0 17 1.0 18 1.0 19 1.0

10  
 11  
 12  
 13  
 14  
 15  
 16  
 17  
 18  
 19 20 1.0  
 20 21 1.0 22 1.0 23 1.0  
 21  
 22  
 23  
 24 29 1.0  
 25 28 1.0  
 26  
 27  
 28 30 1.0  
 29 31 1.0  
 30  
 31  
 32 33 1.0 34 1.0  
 33  
 34  
 35 36 1.0 37 1.0  
 36  
 37

**Ac-Ala-NMe2-beta-HFdonor-HFHFacceptor**

*fixed phi* optimized M062X/juncppVTZ/H2O

0 1  
 N 0.98267600 0.49884600 0.00113000  
 O 2.84657000 -0.72734500 -0.20825800  
 O -1.70015300 0.81332000 -0.01010300  
 C 0.30295200 -1.05311000 1.79386400  
 C 0.17083600 -0.66272800 0.31734600  
 C 2.29701700 0.38749700 -0.19350900  
 C 3.07705000 1.64914000 -0.40669600  
 C -1.28828000 -0.37775900 0.00734200  
 C -3.54347000 -1.08276400 -0.36901900  
 H 0.53433300 -1.46810100 -0.31404800  
 H -0.04547400 -0.23695300 2.42593900  
 H -0.28199100 -1.94368700 2.01717400  
 H 3.58978600 1.58028800 -1.36489200  
 H 3.83456200 1.72324300 0.37234900  
 H 2.44899200 2.53505100 -0.39042100  
 H -3.71113600 -0.64034100 -1.34979300  
 H -3.88766200 -0.39450700 0.39915100  
 H -4.09561700 -2.01355700 -0.29419200  
 N -2.12225100 -1.37878700 -0.17842300  
 C -1.76585400 -2.79450800 -0.21377500  
 H -2.11433100 -3.21935700 -1.15312500  
 H -0.69781100 -2.94637300 -0.13439000  
 H -2.25842500 -3.30464700 0.61241100  
 H 0.59288500 1.42370000 0.10960200  
 H 1.34854200 -1.25449900 2.01498300  
 F -3.71985900 2.01327800 -0.95792900  
 H -2.99228300 1.49857100 -0.61672800  
 F -0.65415300 2.81759200 1.01950300  
 H -1.11971400 2.05075500 0.66826900  
 F 5.24934000 -0.78128100 -0.63528500  
 H 4.28158300 -0.75870300 -0.46427600

1 5 1.0 6 1.5 24 1.0

2 6 2.0  
 3 8 2.0  
 4 5 1.0 11 1.0 12 1.0 25 1.0  
 5 8 1.0 10 1.0  
 6 7 1.0  
 7 13 1.0 14 1.0 15 1.0  
 8 19 2.0  
 9 16 1.0 17 1.0 18 1.0 19 1.0  
 10  
 11  
 12  
 13  
 14  
 15  
 16  
 17  
 18  
 19 20 1.0  
 20 21 1.0 22 1.0 23 1.0  
 21  
 22  
 23  
 24  
 25  
 26  
 27  
 28  
 29  
 30  
 31

*Attempted optimization of the above structure without phi fixed led to geometry optimization with a PPII conformation. Despite the use of a fixed value of phi, frequency calculations on this structure resulted in no observed imaginary/negative frequencies.*

### Ac-Ala-NMe2-beta-HFHFacceptor

*fixed phi optimized M062X/jun-cc-pVTZ/H2O*

|     |             |             |             |
|-----|-------------|-------------|-------------|
| 0 1 |             |             |             |
| N   | 1.50670000  | 0.19405500  | -0.16255300 |
| O   | 3.11127100  | -1.31730500 | -0.65059700 |
| O   | -1.08452400 | 0.94540700  | 0.08239900  |
| C   | 0.71922100  | -1.33706700 | 1.60861000  |
| C   | 0.53930600  | -0.82993200 | 0.17218700  |
| C   | 2.77670800  | -0.15147800 | -0.48198600 |
| C   | 3.74980000  | 0.98713500  | -0.63677200 |
| C   | -0.87316100 | -0.29650000 | 0.01139600  |
| C   | -3.24154000 | -0.60600700 | -0.17859500 |
| H   | 0.71031900  | -1.64295500 | -0.52776500 |
| H   | 0.56305300  | -0.52040100 | 2.31324900  |
| H   | 0.01529400  | -2.13592000 | 1.83717400  |
| H   | 3.28409500  | 1.96242500  | -0.52034000 |
| H   | 4.20947100  | 0.91726700  | -1.62069400 |
| H   | 4.53483600  | 0.87022100  | 0.10879000  |
| H   | -3.93020200 | -1.43087400 | -0.02810500 |
| H   | -3.43961800 | -0.14099500 | -1.14333200 |
| H   | -3.38012100 | 0.12971100  | 0.60913400  |
| N   | -1.87777200 | -1.13538000 | -0.13655600 |
| C   | -1.76620000 | -2.58369200 | -0.27963300 |
| H   | -2.26129200 | -2.88349500 | -1.20147300 |
| H   | -0.73512400 | -2.90849400 | -0.31219400 |
| H   | -2.26244500 | -3.06371200 | 0.56242400  |
| H   | -2.25102200 | 1.83861700  | -0.48075800 |
| H   | -0.25100300 | 2.00002600  | 0.77200600  |
| H   | 1.33486700  | 1.14579200  | 0.12401500  |

|   |             |             |             |
|---|-------------|-------------|-------------|
| H | 1.73217500  | -1.71655700 | 1.72215200  |
| F | 0.34957900  | 2.65266800  | 1.15622600  |
| F | -2.89564100 | 2.46389400  | -0.80802400 |

1 5 1.0 6 1.5 26 1.0  
 2 6 2.0  
 3 8 2.0  
 4 5 1.0 11 1.0 12 1.0 27 1.0  
 5 8 1.0 10 1.0  
 6 7 1.0  
 7 13 1.0 14 1.0 15 1.0  
 8 19 2.0  
 9 16 1.0 17 1.0 18 1.0 19 1.0  
 10  
 11  
 12  
 13  
 14  
 15  
 16  
 17  
 18  
 19 20 1.0  
 20 21 1.0 22 1.0 23 1.0  
 21  
 22  
 23  
 24 29 1.0  
 25 28 1.0  
 26  
 27  
 28  
 29

*Attempted optimization of the above structure without phi fixed led to geometry optimization with a PPII conformation. Despite the use of a fixed value of phi, frequency calculations on this structure resulted in no observed imaginary/negative frequencies.*

#### **Ac-Ala-NMe2-beta-HFHFdonor-HFacceptor**

optimized M062X/juncppVTZ/H2O

|     |             |             |             |
|-----|-------------|-------------|-------------|
| 0 1 |             |             |             |
| N   | -0.66547247 | -0.90869337 | 0.18606078  |
| O   | -2.65846540 | 0.08369109  | -0.13597141 |
| O   | 1.90756443  | -1.18647156 | 0.14804267  |
| C   | -0.05644016 | 0.94381425  | 1.68659723  |
| C   | 0.08543291  | 0.33050817  | 0.29104406  |
| C   | -1.96759807 | -0.96048166 | -0.01002988 |
| C   | -2.62443362 | -2.30078573 | -0.08532263 |
| C   | 1.54652998  | -0.00165992 | 0.02035215  |
| C   | 3.80259866  | 0.63691998  | -0.43077036 |
| H   | -0.29012212 | 1.01127506  | -0.46806363 |
| H   | 0.35041141  | 0.25878590  | 2.42940491  |
| H   | 0.47556066  | 1.89081791  | 1.74971379  |
| H   | -3.12762479 | -2.38507210 | -1.04748347 |
| H   | -3.38228866 | -2.35964213 | 0.69470225  |
| H   | -1.91435921 | -3.11330057 | 0.03038659  |
| H   | 3.94731564  | -0.03034300 | -1.27905303 |
| H   | 4.17144554  | 0.14804234  | 0.46913422  |
| H   | 4.35670699  | 1.55513880  | -0.59505799 |
| N   | 2.38844678  | 0.97431971  | -0.28045704 |
| C   | 2.03337188  | 2.37720977  | -0.46115907 |
| H   | 2.40877591  | 2.71499107  | -1.42528439 |
| H   | 0.96068359  | 2.52672162  | -0.43717365 |

|   |             |             |             |
|---|-------------|-------------|-------------|
| H | 2.49136946  | 2.97457321  | 0.32666242  |
| H | -0.13334275 | -1.76339793 | 0.28458365  |
| H | -1.10727161 | 1.12173480  | 1.90411966  |
| F | 3.98010997  | -2.50769519 | -0.15545964 |
| H | 3.20200909  | -1.94288826 | -0.04826931 |
| F | -5.10023722 | -0.23192572 | -0.50814765 |
| H | -4.15339039 | -0.10413919 | -0.36385205 |
| F | -2.09419034 | 2.53016550  | -0.17784134 |
| H | -2.29740227 | 1.59151131  | -0.15149755 |

1 5 1.0 6 1.5 24 1.0  
 2 6 2.0  
 3 8 2.0  
 4 5 1.0 11 1.0 12 1.0 25 1.0  
 5 8 1.0 10 1.0  
 6 7 1.0  
 7 13 1.0 14 1.0 15 1.0  
 8 19 1.5  
 9 16 1.0 17 1.0 18 1.0 19 1.0  
 10  
 11  
 12  
 13  
 14  
 15  
 16  
 17  
 18  
 19 20 1.0  
 20 21 1.0 22 1.0 23 1.0  
 21  
 22  
 23  
 24  
 25  
 26 27 1.0  
 27  
 28 29 1.0  
 29  
 30 31 1.0  
 31

#### Ac-Ala-NMe2-beta-HFHDonor-HFHAcceptor

optimized M062X/juncppVTZ/H2O

|   |             |             |             |
|---|-------------|-------------|-------------|
| O | 1           |             |             |
| N | -0.73872341 | -0.80027066 | 0.19454348  |
| O | -2.69679389 | 0.20782922  | -0.29200654 |
| O | 1.96770150  | -0.86915736 | 0.03029175  |
| C | -0.14539375 | 0.91550473  | 1.85839116  |
| C | -0.01875612 | 0.44379558  | 0.40725519  |
| C | -2.02466762 | -0.83783738 | -0.11322709 |
| C | -2.67499327 | -2.17640942 | -0.25229791 |
| C | 1.44684251  | 0.27824347  | 0.04144505  |
| C | 3.60521889  | 1.19589046  | -0.44085579 |
| H | -0.45976622 | 1.17162578  | -0.26536829 |
| H | 0.30074955  | 0.18139084  | 2.52850100  |
| H | 0.35245724  | 1.87260926  | 2.00104127  |
| H | -3.10792883 | -2.24834240 | -1.24900791 |
| H | -3.48682683 | -2.24287889 | 0.47069164  |
| H | -1.97573974 | -2.99221734 | -0.09634968 |
| H | 3.78701225  | 0.83988083  | -1.45401408 |
| H | 4.02431996  | 0.48993514  | 0.27069174  |
| H | 4.07489325  | 2.16511919  | -0.30873788 |
| N | 2.16881651  | 1.35045145  | -0.20377059 |
| C | 1.66930654  | 2.72146410  | -0.28111183 |

|   |             |             |             |
|---|-------------|-------------|-------------|
| H | 1.96997364  | 3.14442540  | -1.23762465 |
| H | 0.59061091  | 2.77178069  | -0.19897950 |
| H | 2.11471927  | 3.30666680  | 0.52200011  |
| H | -0.28554767 | -1.67817630 | 0.41381530  |
| H | -1.19840144 | 1.03146881  | 2.10663246  |
| F | 3.94893671  | -1.85357574 | -1.21162071 |
| H | 3.22682967  | -1.42803051 | -0.75705883 |
| F | 1.10763193  | -2.89640975 | 1.15735844  |
| H | 1.51967879  | -2.12150204 | 0.75335157  |
| F | -5.08554026 | -0.09410499 | -0.95475332 |
| H | -4.16384356 | 0.02808317  | -0.69932631 |
| F | -2.21552207 | 2.64285657  | 0.12715147  |
| H | -2.40600280 | 1.71471706  | -0.02276562 |

1 5 1.0 6 1.5 24 1.0  
 2 6 2.0  
 3 8 2.0  
 4 5 1.0 11 1.0 12 1.0 25 1.0  
 5 8 1.0 10 1.0  
 6 7 1.0  
 7 13 1.0 14 1.0 15 1.0  
 8 19 1.5  
 9 16 1.0 17 1.0 18 1.0 19 1.0  
 10  
 11  
 12  
 13  
 14  
 15  
 16  
 17  
 18  
 19 20 1.0  
 20 21 1.0 22 1.0 23 1.0  
 21  
 22  
 23  
 24  
 25  
 26 27 1.0  
 27  
 28 29 1.0  
 29  
 30 31 1.0  
 31  
 32 33 1.0  
 33

### Ac-Ala-NMe2-beta-HFHDonor

optimized M062X/juncppVTZ/H2O

|     |             |             |             |
|-----|-------------|-------------|-------------|
| 0 1 |             |             |             |
| N   | -0.52613836 | -1.05180671 | 0.11798384  |
| O   | -2.28498845 | 0.33138260  | -0.11166287 |
| O   | 1.91797778  | -1.87731402 | 0.02974830  |
| C   | 0.45491944  | 0.59810581  | 1.65223550  |
| C   | 0.46896713  | -0.00044316 | 0.24394657  |
| C   | -1.81351518 | -0.83515568 | -0.04291203 |
| C   | -2.73039144 | -2.01147664 | -0.14583934 |
| C   | 1.82568694  | -0.65246705 | -0.03533264 |
| C   | 4.19711904  | -0.40937519 | -0.44414430 |
| H   | 0.24699783  | 0.75929592  | -0.50079187 |
| H   | 0.71745778  | -0.17125720 | 2.37757717  |
| H   | 1.16702289  | 1.41644011  | 1.73430822  |
| H   | -3.26978840 | -1.94830958 | -1.08968121 |

|   |             |             |             |
|---|-------------|-------------|-------------|
| H | -3.46035481 | -1.95224662 | 0.66029593  |
| H | -2.19719918 | -2.95512458 | -0.08902864 |
| H | 4.53569548  | -0.27965827 | -1.47265379 |
| H | 4.17614537  | -1.46404519 | -0.19805724 |
| H | 4.88830976  | 0.11011420  | 0.21925803  |
| N | 2.86553716  | 0.15515311  | -0.28454063 |
| C | 2.80969238  | 1.60272647  | -0.41216076 |
| H | 3.31242737  | 1.89398254  | -1.33409515 |
| H | 1.79159919  | 1.97161627  | -0.44908024 |
| H | 3.32512260  | 2.07232533  | 0.42690363  |
| H | -0.16316302 | -1.99671105 | 0.15667894  |
| H | -0.53712804 | 0.97974147  | 1.88398829  |
| F | -4.74308147 | 0.53204773  | -0.40675686 |
| H | -3.78487521 | 0.45679306  | -0.29234113 |
| F | -1.23945995 | 2.60941545  | -0.14709533 |
| H | -1.61997312 | 1.72641409  | -0.12215519 |

1 5 1.0 6 1.5 24 1.0  
 2 6 2.0  
 3 8 2.0  
 4 5 1.0 11 1.0 12 1.0 25 1.0  
 5 8 1.0 10 1.0  
 6 7 1.0  
 7 13 1.0 14 1.0 15 1.0  
 8 19 1.5  
 9 16 1.0 17 1.0 18 1.0 19 1.0  
 10  
 11  
 12  
 13  
 14  
 15  
 16  
 17  
 18  
 19 20 1.0  
 20 21 1.0 22 1.0 23 1.0  
 21  
 22  
 23  
 24  
 25  
 26 27 1.0  
 27  
 28 29 1.0  
 29

#### Ac-Ala-NMe2-beta

M062X/juncppVTZ/H2O optimized

|     |             |             |             |
|-----|-------------|-------------|-------------|
| O 1 |             |             |             |
| N   | -1.34374261 | -0.43002951 | 0.09612889  |
| O   | -2.72157329 | 1.21913635  | -0.58120851 |
| O   | 0.89979006  | -1.72415757 | 0.35757474  |
| C   | -0.09846630 | 1.25609204  | 1.38060170  |
| C   | -0.15826648 | 0.39842052  | 0.11333836  |
| C   | -2.55015373 | 0.04718942  | -0.25431419 |
| C   | -3.68955043 | -0.93893749 | -0.22639445 |
| C   | 1.04991239  | -0.53855629 | 0.06407013  |
| C   | 3.44072985  | -0.83767520 | -0.18713870 |
| H   | -0.19331606 | 1.03797150  | -0.76646111 |
| H   | -0.06660426 | 0.60982859  | 2.25768346  |
| H   | 0.78053500  | 1.89810425  | 1.38782807  |
| H   | -4.12748715 | -0.99030868 | -1.22178864 |
| H   | -4.45190336 | -0.56573695 | 0.45529474  |
| H   | -3.38207432 | -1.93369932 | 0.08521069  |



|   |             |             |             |
|---|-------------|-------------|-------------|
| H | 3.86121197  | -0.95837204 | -1.18636748 |
| H | 3.19015659  | -1.80905976 | 0.22160910  |
| H | 4.18411732  | -0.35308351 | 0.44655551  |
| N | 2.24597388  | -0.01060665 | -0.24623961 |
| C | 2.49588078  | 1.36929822  | -0.62661352 |
| H | 3.10826705  | 1.38095218  | -1.52827326 |
| H | 1.57869706  | 1.90654594  | -0.83327019 |
| H | 3.03866786  | 1.88730056  | 0.16618107  |
| H | -1.21302672 | -1.39969984 | 0.34244578  |
| H | -0.98911052 | 1.87889285  | 1.43190143  |

1 5 1.0 6 1.5 24 1.0  
 2 6 2.0  
 3 8 2.0  
 4 5 1.0 11 1.0 12 1.0 25 1.0  
 5 8 1.0 10 1.0  
 6 7 1.0  
 7 13 1.0 14 1.0 15 1.0  
 8 19 1.5  
 9 16 1.0 17 1.0 18 1.0 19 1.0  
 10  
 11  
 12  
 13  
 14  
 15  
 16  
 17  
 18  
 19 20 1.0  
 20 21 1.0 22 1.0 23 1.0  
 21  
 22  
 23  
 24  
 25

#### Ac-Ala-NMe2-beta-ureaacceptor

optimized M062X/juncppVTZ/H2O

|     |             |             |             |
|-----|-------------|-------------|-------------|
| O 1 |             |             |             |
| N   | -1.99662700 | -0.86278900 | -0.05668400 |
| O   | -4.23082800 | -0.60233600 | -0.17796000 |
| O   | 0.51103300  | -0.15780700 | -0.24503300 |
| C   | -1.97675900 | 0.89355500  | 1.66748800  |
| C   | -1.73095200 | 0.53564700  | 0.19842900  |
| C   | -3.24531800 | -1.33296900 | -0.22927400 |
| C   | -3.36947000 | -2.81025300 | -0.49848400 |
| C   | -0.27139000 | 0.79927900  | -0.15570000 |
| C   | 1.56576100  | 2.28416300  | -0.54127300 |
| H   | -2.39433100 | 1.11643200  | -0.43981300 |
| H   | -1.30872500 | 0.31171700  | 2.30240700  |
| H   | -1.80256400 | 1.95199400  | 1.85349500  |
| H   | -3.81782000 | -2.94422000 | -1.48177900 |
| H   | -4.04569900 | -3.24036700 | 0.23787800  |
| H   | -2.41589600 | -3.33055500 | -0.46352900 |
| H   | 1.82825900  | 2.02542900  | -1.56793500 |
| H   | 2.16631400  | 1.68053000  | 0.13553300  |
| H   | 1.77940000  | 3.33558000  | -0.37213600 |
| N   | 0.14509300  | 2.05780600  | -0.29823700 |
| C   | -0.69838500 | 3.24424600  | -0.29163900 |
| H   | -0.51445300 | 3.81564100  | -1.20066500 |
| H   | -1.74958900 | 2.98705300  | -0.25559000 |
| H   | -0.45674000 | 3.86726200  | 0.56970400  |
| C   | 3.81364800  | -1.13567800 | 0.13046000  |

|   |             |             |             |
|---|-------------|-------------|-------------|
| N | 3.28627800  | -0.76718700 | -1.06645500 |
| H | 3.77206500  | -1.06537200 | -1.89333700 |
| H | 2.31107100  | -0.50782900 | -1.12668100 |
| N | 3.03103300  | -0.85230500 | 1.21215300  |
| H | 3.31100500  | -1.26736800 | 2.08371800  |
| H | 2.05063400  | -0.65639000 | 1.06820500  |
| O | 4.93300900  | -1.63483900 | 0.23921600  |
| H | -1.19523900 | -1.47192500 | -0.11929200 |
| H | -3.00666200 | 0.65563700  | 1.92456100  |

1 5 1.0 6 1.5 32 1.0  
 2 6 2.0  
 3 8 2.0  
 4 5 1.0 11 1.0 12 1.0 33 1.0  
 5 8 1.0 10 1.0  
 6 7 1.0  
 7 13 1.0 14 1.0 15 1.0  
 8 19 1.5  
 9 16 1.0 17 1.0 18 1.0 19 1.0  
 10  
 11  
 12  
 13  
 14  
 15  
 16  
 17  
 18  
 19 20 1.0  
 20 21 1.0 22 1.0 23 1.0  
 21  
 22  
 23  
 24 25 1.5 28 1.5 31 2.0  
 25 26 1.0 27 1.0  
 26  
 27  
 28 29 1.0 30 1.0  
 29  
 30  
 31  
 32  
 33

**Ac-Ala-NMe2-PPII-H2OH2OacceptorH2OH2O**

optimized M062X/juncppVTZ/H2O

|     |             |             |             |
|-----|-------------|-------------|-------------|
| 0 1 |             |             |             |
| N   | -0.36000000 | -1.79700000 | 0.09300000  |
| O   | -1.12600000 | -1.41900000 | -1.98500000 |
| O   | -0.04500000 | 0.92900000  | -0.00500000 |
| C   | -1.24200000 | -0.98800000 | 2.20300000  |
| C   | -1.36900000 | -0.95100000 | 0.68400000  |
| C   | -0.30100000 | -1.94700000 | -1.24400000 |
| C   | 0.81600000  | -2.80700000 | -1.77100000 |
| C   | -1.18500000 | 0.49200000  | 0.20900000  |
| C   | -2.04000000 | 2.64600000  | -0.34900000 |
| H   | -2.34600000 | -1.31400000 | 0.37200000  |
| H   | -0.25600000 | -0.62900000 | 2.50000000  |
| H   | -1.99600000 | -0.35700000 | 2.67100000  |
| H   | 1.32400000  | -2.26900000 | -2.56900000 |
| H   | 0.38500000  | -3.71300000 | -2.19500000 |
| H   | 1.53200000  | -3.07400000 | -0.99700000 |
| H   | -2.99800000 | 3.15000000  | -0.41800000 |
| H   | -1.55600000 | 2.65800000  | -1.32600000 |
| H   | -1.40200000 | 3.17500000  | 0.35700000  |

|   |             |             |             |
|---|-------------|-------------|-------------|
| N | -2.25900000 | 1.27200000  | 0.09500000  |
| C | -3.62300000 | 0.78600000  | 0.28400000  |
| H | -3.94700000 | 0.17700000  | -0.56100000 |
| H | -3.71000000 | 0.20800000  | 1.20000000  |
| H | -4.28300000 | 1.64400000  | 0.36900000  |
| H | 0.82000000  | 2.53200000  | -0.38400000 |
| H | 1.54500000  | 0.09800000  | -0.03900000 |
| H | 0.39000000  | -2.15700000 | 0.67500000  |
| H | -1.36800000 | -2.00800000 | 2.56200000  |
| O | 2.45300000  | -0.26000000 | -0.05100000 |
| O | 1.40200000  | 3.28900000  | -0.55700000 |
| H | 3.04000000  | 0.50400000  | 0.04800000  |
| H | 2.28700000  | 2.98100000  | -0.32100000 |
| O | 4.01400000  | 2.14500000  | 0.13800000  |
| H | 4.71400000  | 2.26000000  | -0.51300000 |
| H | 4.40600000  | 2.38200000  | 0.98400000  |
| O | 2.08900000  | -2.34500000 | 1.65400000  |
| H | 2.41000000  | -1.61200000 | 1.08900000  |
| H | 2.70800000  | -3.07000000 | 1.53700000  |

1 5 1.0 6 1.5 26 1.0  
 2 6 2.0  
 3 8 2.0  
 4 5 1.0 11 1.0 12 1.0 27 1.0  
 5 8 1.0 10 1.0  
 6 7 1.0  
 7 13 1.0 14 1.0 15 1.0  
 8 19 1.5  
 9 16 1.0 17 1.0 18 1.0 19 1.0  
 10  
 11  
 12  
 13  
 14  
 15  
 16  
 17  
 18  
 19 20 1.0  
 20 21 1.0 22 1.0 23 1.0  
 21  
 22  
 23  
 24 29 1.0  
 25 28 1.0  
 26  
 27  
 28 30 1.0  
 29 31 1.0  
 30  
 31  
 32 33 1.0 34 1.0  
 33  
 34  
 35 36 1.0 37 1.0  
 36  
 37

**Ac-Ala-NMe2-PPII-HFdonor-HFHAcceptor**

optimized M062X/juncppVTZ/H2O

|     |             |             |             |
|-----|-------------|-------------|-------------|
| 0 1 |             |             |             |
| N   | -1.05244700 | 1.12627000  | -0.83953500 |
| O   | -1.62538900 | -0.97484200 | -0.38079300 |
| O   | 1.03082600  | 0.55365500  | 0.86269300  |

|   |             |             |             |
|---|-------------|-------------|-------------|
| C | 0.98521600  | 1.88621700  | -1.94765600 |
| C | 0.21876300  | 0.69484200  | -1.38550900 |
| C | -1.90537400 | 0.23593400  | -0.33347800 |
| C | -3.17324300 | 0.73602000  | 0.28364900  |
| C | 1.04702200  | 0.03787100  | -0.28562100 |
| C | 2.63548700  | -1.57129000 | 0.49003900  |
| H | 0.01403500  | -0.02784700 | -2.16974500 |
| H | 1.17393300  | 2.61975800  | -1.16392500 |
| H | 1.93921900  | 1.56015400  | -2.35740800 |
| H | -3.18146400 | 0.44529100  | 1.33349200  |
| H | -4.01510400 | 0.24850600  | -0.20512800 |
| H | -3.27517200 | 1.81413300  | 0.20291200  |
| H | 3.36605400  | -2.23293400 | 0.03932300  |
| H | 2.02604600  | -2.13134000 | 1.19875800  |
| H | 3.15159900  | -0.77375100 | 1.01804600  |
| N | 1.79956100  | -1.00327200 | -0.56861100 |
| C | 1.74357800  | -1.68128700 | -1.86744400 |
| H | 0.76781300  | -2.14091500 | -2.01712800 |
| H | 1.95513800  | -0.98840000 | -2.67831600 |
| H | 2.50093700  | -2.45646400 | -1.87613500 |
| F | 1.57875700  | -0.26515900 | 3.17803900  |
| H | 1.39878400  | -0.00084100 | 2.27525900  |
| F | 0.06323400  | 2.81690300  | 1.27094800  |
| H | 0.41929100  | 1.93164600  | 1.11384700  |
| F | -3.26456800 | -2.54474500 | 0.53297700  |
| H | -2.60706900 | -1.91581100 | 0.16752500  |
| H | -1.21867100 | 2.11145300  | -0.69969400 |
| H | 0.40583300  | 2.35303700  | -2.74142300 |

1 5 1.0 6 1.5 30 1.0  
 2 6 2.0  
 3 8 2.0  
 4 5 1.0 11 1.0 12 1.0 31 1.0  
 5 8 1.0 10 1.0  
 6 7 1.0  
 7 13 1.0 14 1.0 15 1.0  
 8 19 2.0  
 9 16 1.0 17 1.0 18 1.0 19 1.0  
 10  
 11  
 12  
 13  
 14  
 15  
 16  
 17  
 18  
 19 20 1.0  
 20 21 1.0 22 1.0 23 1.0  
 21  
 22  
 23  
 24 25 1.0  
 25  
 26 27 1.0  
 27  
 28 29 1.0  
 29  
 30  
 31

**Ac-Ala-NMe2-PPII-HFHAcceptor**

optimized M062X/juncppVTZ/H2O

|     |            |             |            |
|-----|------------|-------------|------------|
| 0 1 |            |             |            |
| N   | 1.65940400 | -0.66428600 | 0.30743300 |

|   |             |             |             |
|---|-------------|-------------|-------------|
| O | 1.04918200  | -0.81409900 | -1.84203300 |
| O | -0.53604800 | 1.02660700  | 0.43998700  |
| C | 0.33411200  | -1.28780300 | 2.26062900  |
| C | 0.37515500  | -1.16603900 | 0.74129800  |
| C | 1.88735000  | -0.47934900 | -1.01164300 |
| C | 3.20016500  | 0.14504600  | -1.39369000 |
| C | -0.72614400 | -0.21129900 | 0.29317300  |
| C | -2.95872300 | 0.23717400  | -0.46273300 |
| H | 0.22180000  | -2.13998600 | 0.28691600  |
| H | 0.49285400  | -0.31441800 | 2.72449300  |
| H | -0.63023300 | -1.67646100 | 2.58280400  |
| H | 2.99604200  | 1.04955700  | -1.96411000 |
| H | 3.73863900  | -0.54539600 | -2.04050500 |
| H | 3.81604800  | 0.39001600  | -0.53254300 |
| H | -3.89455700 | -0.30973900 | -0.41964800 |
| H | -2.83411700 | 0.66770200  | -1.45619900 |
| H | -2.97752300 | 1.03635000  | 0.27236200  |
| N | -1.86631500 | -0.68689200 | -0.15986400 |
| C | -2.04976800 | -2.10453300 | -0.48538100 |
| H | -1.29643900 | -2.42786500 | -1.20085900 |
| H | -2.00431800 | -2.72146800 | 0.40991600  |
| H | -3.02922300 | -2.22065300 | -0.93545700 |
| F | -1.46046300 | 3.01204600  | -0.77780200 |
| H | -1.14820000 | 2.22391400  | -0.32621600 |
| F | 1.40177400  | 1.94188500  | 1.70609000  |
| H | 0.66262400  | 1.57300400  | 1.19939900  |
| H | 2.27153400  | -0.24002500 | 0.98674700  |
| H | 1.11368600  | -1.97091500 | 2.59176700  |

1 5 1.0 6 1.5 28 1.0  
 2 6 2.0  
 3 8 2.0  
 4 5 1.0 11 1.0 12 1.0 29 1.0  
 5 8 1.0 10 1.0  
 6 7 1.0  
 7 13 1.0 14 1.0 15 1.0  
 8 19 2.0  
 9 16 1.0 17 1.0 18 1.0 19 1.0  
 10  
 11  
 12  
 13  
 14  
 15  
 16  
 17  
 18  
 19 20 1.0  
 20 21 1.0 22 1.0 23 1.0  
 21  
 22  
 23  
 24 25 1.0  
 25  
 26 27 1.0  
 27  
 28  
 29

**Ac-Ala-NMe2-PPII-HFHFdonor-HFacceptor**

M062X/juncppVTZ/H2O optimized

|     |             |             |             |
|-----|-------------|-------------|-------------|
| 0 1 |             |             |             |
| N   | -0.97220523 | -1.29001823 | -0.96048975 |
| O   | -1.85309279 | 0.04039484  | 0.62105687  |

|   |             |             |             |
|---|-------------|-------------|-------------|
| O | 0.74713551  | 0.71433523  | -1.17376159 |
| C | 1.07972645  | -2.58194765 | -0.97576465 |
| C | 0.30380320  | -1.46112927 | -0.29195585 |
| C | -1.94885404 | -0.53532527 | -0.49016806 |
| C | -3.18917335 | -0.37750143 | -1.30767099 |
| C | 1.10154544  | -0.15084068 | -0.35580237 |
| C | 2.97952554  | 1.19405698  | 0.26906603  |
| H | 0.10046544  | -1.71857840 | 0.74492696  |
| H | 1.27481740  | -2.32175896 | -2.01625305 |
| H | 2.03330576  | -2.74636305 | -0.48082075 |
| H | -3.29795237 | 0.67654760  | -1.56100326 |
| H | -4.04597658 | -0.66552331 | -0.70078665 |
| H | -3.16468943 | -0.97081992 | -2.21624753 |
| H | 3.93110552  | 1.03099444  | 0.76586168  |
| H | 2.47517144  | 2.04686792  | 0.72441185  |
| H | 3.15532408  | 1.40673924  | -0.78227645 |
| N | 2.17521557  | -0.01558673 | 0.40994422  |
| C | 2.57566441  | -0.92091575 | 1.47822709  |
| H | 2.65594627  | -0.35427952 | 2.40449169  |
| H | 1.84946073  | -1.70868881 | 1.62947745  |
| H | 3.54352370  | -1.36292901 | 1.24260319  |
| F | 1.26643554  | 3.08267115  | -1.59928283 |
| H | 1.10807945  | 2.14563197  | -1.39470816 |
| F | -3.83257792 | 1.35239574  | 1.38742255  |
| H | -3.06432954 | 0.84871959  | 1.09322655  |
| F | -0.12181734 | 0.11020473  | 2.43025943  |
| H | -0.77413249 | 0.07550885  | 1.72632559  |
| H | -1.07998290 | -1.68158473 | -1.88386756 |
| H | 0.50466094  | -3.50491586 | -0.94108476 |

1 5 1.0 6 1.5 30 1.0  
 2 6 2.0  
 3 8 2.0  
 4 5 1.0 11 1.0 12 1.0 31 1.0  
 5 8 1.0 10 1.0  
 6 7 1.0  
 7 13 1.0 14 1.0 15 1.0  
 8 19 2.0  
 9 16 1.0 17 1.0 18 1.0 19 1.0  
 10  
 11  
 12  
 13  
 14  
 15  
 16  
 17  
 18  
 19 20 1.0  
 20 21 1.0 22 1.0 23 1.0  
 21  
 22  
 23  
 24 25 1.0  
 25  
 26 27 1.0  
 27  
 28 29 1.0  
 29  
 30  
 31

**Ac-Ala-NMe2-PPII-HFHDonor-HFHFAcceptor**

optimized M062X/juncppVTZ/H2O

0 1

|   |             |             |             |
|---|-------------|-------------|-------------|
| N | 0.94941700  | -0.06663300 | 1.52128500  |
| O | 1.66730400  | -0.95057200 | -0.41438000 |
| O | -0.70814400 | 1.23030800  | -0.14140700 |
| C | -1.13861300 | -0.35375200 | 2.72317400  |
| C | -0.40042100 | -0.58449100 | 1.40779000  |
| C | 1.88260600  | -0.24397200 | 0.59858800  |
| C | 3.20085600  | 0.43301900  | 0.77874800  |
| C | -1.14039800 | 0.12325600  | 0.26935200  |
| C | -2.96962000 | 0.33503600  | -1.25306100 |
| H | -0.33194900 | -1.64729800 | 1.18834100  |
| H | -1.19336600 | 0.71339900  | 2.93896600  |
| H | -2.15128400 | -0.74449300 | 2.66703800  |
| H | 3.30096400  | 1.18308200  | -0.00554900 |
| H | 3.99361000  | -0.30156600 | 0.65153600  |
| H | 3.28758100  | 0.91506500  | 1.74713000  |
| H | -3.93125900 | -0.14555700 | -1.39904000 |
| H | -2.41288100 | 0.32434800  | -2.18932700 |
| H | -3.12431800 | 1.36449500  | -0.93918700 |
| N | -2.24197000 | -0.40237900 | -0.22040800 |
| C | -2.79782600 | -1.70282600 | 0.13817800  |
| H | -2.88921700 | -2.30221000 | -0.76524300 |
| H | -2.16629700 | -2.23342700 | 0.83802900  |
| H | -3.78248300 | -1.55881100 | 0.58049200  |
| F | -1.07244700 | 2.69278300  | -2.16268000 |
| H | -0.99063400 | 2.09836600  | -1.41779200 |
| F | 1.02019000  | 2.76142800  | 0.84820600  |
| H | 0.36341700  | 2.14878400  | 0.50662700  |
| F | 3.54693700  | -1.15397800 | -2.05414600 |
| H | 2.82010600  | -1.07794900 | -1.42729700 |
| F | -0.19344100 | -2.47266500 | -1.13872100 |
| H | 0.51280800  | -1.88889300 | -0.85680700 |
| H | 1.15226800  | 0.56836100  | 2.27951600  |
| H | -0.61313000 | -0.85624800 | 3.53218300  |

1 5 1.0 6 1.5 32 1.0  
2 6 2.0  
3 8 2.0  
4 5 1.0 11 1.0 12 1.0 33 1.0  
5 8 1.0 10 1.0  
6 7 1.0  
7 13 1.0 14 1.0 15 1.0  
8 19 2.0  
9 16 1.0 17 1.0 18 1.0 19 1.0  
10  
11  
12  
13  
14  
15  
16  
17  
18  
19 20 1.0  
20 21 1.0 22 1.0 23 1.0  
21  
22  
23  
24 25 1.0  
25  
26 27 1.0  
27  
28 29 1.0  
29  
30 31 1.0  
31  
32  
33

**Ac-Ala-NMe2-PPII-HFHDonor**

optimized M062X/juncppVTZ/H2O

0 1  
N -0.80215400 1.52150800 -0.14562100  
O -1.74860300 -0.51240900 -0.27443100  
O 0.69168800 0.31785900 1.70510400  
C 1.36765800 2.30436600 -0.88531500  
C 0.51745000 1.08119200 -0.56084400  
C -1.82937800 0.70879800 0.00986700  
C -3.11700900 1.26811900 0.52243700  
C 1.16612500 0.26631500 0.57553600  
C 2.96088800 -1.14170200 1.34804500  
H 0.39078200 0.46019700 -1.44492100  
H 1.47329800 2.92981200 0.00184900  
H 2.36045400 2.00499000 -1.21127200  
H -3.37410400 0.74645900 1.44336300  
H -3.89928500 1.06351000 -0.20705200  
H -3.06006500 2.33575100 0.70952600  
H 2.62034600 -2.17897000 1.38384700  
H 2.75871000 -0.66625300 2.30131300  
H 4.03153600 -1.13078200 1.15192400  
N 2.28449300 -0.41751400 0.28385300  
C 2.80805900 -0.67050800 -1.04758000  
H 2.86840000 -1.74744700 -1.20700300  
H 2.17301100 -0.25631900 -1.82009900  
H 3.80747300 -0.24360100 -1.14288600  
F -3.80542300 -1.87673900 0.04965100  
H -3.00467300 -1.35060100 -0.07723600  
F 0.06195000 -2.01086300 -1.13317100  
H -0.61122700 -1.41291500 -0.79720500  
H -0.90725900 2.47722800 0.15876400  
H 0.90004600 2.88632600 -1.67712900

1 5 1.0 6 2.0 28 1.0  
2 6 2.0  
3 8 2.0  
4 5 1.0 11 1.0 12 1.0 29 1.0  
5 8 1.0 10 1.0  
6 7 1.0  
7 13 1.0 14 1.0 15 1.0  
8 19 1.5  
9 16 1.0 17 1.0 18 1.0 19 1.0  
10  
11  
12  
13  
14  
15  
16  
17  
18  
19 20 1.0  
20 21 1.0 22 1.0 23 1.0  
21  
22  
23  
24 25 1.0  
25  
26 27 1.0  
27  
28  
29

**Ac-Ala-NMe2-PPII-HFtrans**



optimized M062X/juncppVTZ/H2O

```
0 1
N      1.78855100 -0.39699400  0.56471400
O      1.78547200  0.08913500 -1.62679100
O     -0.49991000  1.02684900  0.51868600
C      0.25452500 -1.81785900  1.80053900
C      0.54246100 -1.11955200  0.47614700
C      2.30948400  0.20627700 -0.52474100
C      3.55953500  1.01678100 -0.31442100
C     -0.60242900 -0.15594900  0.14904800
C     -2.76147100  0.33042200 -0.76573800
H      0.64569700 -1.84327400 -0.32877500
H      0.15849800 -1.07959700  2.59723400
H     -0.67247700 -2.38525600  1.74815700
H      3.33074200  2.06072600 -0.52473400
H      4.31106900  0.68786600 -1.02920400
H      3.95443200  0.93167400  0.69447800
H     -3.46349300 -0.15114300 -1.43951800
H     -2.36275700  1.22364300 -1.24105900
H     -3.27942500  0.62020900  0.14838100
N     -1.68320700 -0.60985000 -0.47573000
C     -1.92703100 -1.99420500 -0.85926800
H     -2.00328900 -2.06881200 -1.94349700
H     -1.14059100 -2.65249400 -0.51381300
H     -2.86631400 -2.32438100 -0.41692800
F     -1.96516700  2.97954800  0.73207900
H     -1.42880600  2.17260100  0.61398000
H      2.16315600 -0.18440700  1.47473900
H      1.06770700 -2.49873600  2.04441300
```

```
1 5 1.0 6 1.5 26 1.0
2 6 2.0
3 8 2.0
4 5 1.0 11 1.0 12 1.0 27 1.0
5 8 1.0 10 1.0
6 7 1.0
7 13 1.0 14 1.0 15 1.0
8 19 1.5
9 16 1.0 17 1.0 18 1.0 19 1.0
10
11
12
13
14
15
16
17
18
19 20 1.0
20 21 1.0 22 1.0 23 1.0
21
22
23
24 25 1.0
25
26
27
```

**Ac-Ala-NMe2-PPII**

optimized M062X/juncppVTZ/H2O

```
0 1
N      1.53182300  0.71494800 -0.07939000
O      1.48676000 -1.24566400  1.01433300
```

|   |             |             |             |
|---|-------------|-------------|-------------|
| O | -0.41806800 | -0.44863900 | -1.61445400 |
| C | -0.20807900 | 2.40378000  | -0.22935600 |
| C | 0.14437800  | 0.98993000  | 0.21576600  |
| C | 2.09889100  | -0.44194200 | 0.31820900  |
| C | 3.51302400  | -0.69099900 | -0.13342500 |
| C | -0.75844300 | -0.01298600 | -0.51944400 |
| C | -2.82715900 | -1.27815000 | -0.55950700 |
| H | 0.01367300  | 0.88532500  | 1.29016700  |
| H | -0.06209900 | 2.50210300  | -1.30558300 |
| H | -1.24901800 | 2.63040200  | -0.00576500 |
| H | 3.50661200  | -1.52591200 | -0.83329300 |
| H | 4.10915000  | -0.98102700 | 0.72904900  |
| H | 3.96186700  | 0.17451600  | -0.61366900 |
| H | -2.88850700 | -2.18541100 | 0.04414000  |
| H | -2.45077800 | -1.52680300 | -1.54472800 |
| H | -3.82473900 | -0.84849600 | -0.64672400 |
| N | -1.93137000 | -0.31923800 | 0.06733700  |
| C | -2.30309100 | 0.12115300  | 1.40590500  |
| H | -1.76953000 | -0.43910600 | 2.17604100  |
| H | -2.12181000 | 1.18388300  | 1.54448800  |
| H | -3.36882000 | -0.05064200 | 1.53181300  |
| H | 2.01011800  | 1.29279300  | -0.75087400 |
| H | 0.42405000  | 3.12811200  | 0.28138000  |

1 5 1.0 6 1.5 24 1.0  
 2 6 2.0  
 3 8 2.0  
 4 5 1.0 11 1.0 12 1.0 25 1.0  
 5 8 1.0 10 1.0  
 6 7 1.0  
 7 13 1.0 14 1.0 15 1.0  
 8 19 1.5  
 9 16 1.0 17 1.0 18 1.0 19 1.0  
 10  
 11  
 12  
 13  
 14  
 15  
 16  
 17  
 18  
 19 20 1.0  
 20 21 1.0 22 1.0 23 1.0  
 21  
 22  
 23  
 24  
 25

#### Ac-Ala-NMe2-PPII-ureaacceptor

optimized M062X/juncppVTZ/H2O

|               |             |             |             |
|---------------|-------------|-------------|-------------|
| 0 1 0 1 0 1   |             |             |             |
| N(Fragment=1) | -0.13772400 | 1.47991200  | 0.40911700  |
| O(Fragment=1) | -0.04007600 | 1.18862100  | -1.81357100 |
| O(Fragment=1) | 0.51256700  | -1.17844800 | 0.45461700  |
| C(Fragment=1) | 1.64290700  | 1.31812200  | 2.05156400  |
| C(Fragment=1) | 1.24246000  | 1.09893000  | 0.59705400  |
| C(Fragment=1) | -0.69276900 | 1.49295000  | -0.82054300 |
| C(Fragment=1) | -2.12688100 | 1.94418600  | -0.89564600 |
| C(Fragment=1) | 1.43208500  | -0.38154400 | 0.24282000  |
| C(Fragment=1) | 2.86125500  | -2.14383900 | -0.60737500 |
| H(Fragment=1) | 1.84830800  | 1.71469900  | -0.06377600 |
| H(Fragment=1) | 1.02590100  | 0.69880900  | 2.70369500  |
| H(Fragment=1) | 2.68500600  | 1.04820000  | 2.21080000  |

|               |             |             |             |
|---------------|-------------|-------------|-------------|
| H(Fragment=1) | -2.61932400 | 1.43104700  | -1.71674700 |
| H(Fragment=1) | -2.14109300 | 3.01583500  | -1.09675500 |
| H(Fragment=1) | -2.66560600 | 1.75776600  | 0.03190900  |
| H(Fragment=1) | 3.05160900  | -2.20776000 | -1.67943800 |
| H(Fragment=1) | 1.99113700  | -2.73836300 | -0.35715400 |
| H(Fragment=1) | 3.73184800  | -2.52385100 | -0.07384400 |
| N(Fragment=1) | 2.62471400  | -0.75705900 | -0.23259100 |
| C(Fragment=1) | 3.70366100  | 0.17354400  | -0.54465900 |
| H(Fragment=1) | 3.54010600  | 0.66212100  | -1.50648700 |
| H(Fragment=1) | 3.82209200  | 0.92655900  | 0.22890700  |
| H(Fragment=1) | 4.62920400  | -0.39364900 | -0.59734800 |
| C(Fragment=2) | -2.92487000 | -1.03619000 | 0.23672500  |
| N(Fragment=2) | -2.14084700 | -1.39224700 | -0.81910700 |
| H(Fragment=2) | -2.54902500 | -1.29882400 | -1.73280100 |
| H(Fragment=2) | -1.13496700 | -1.33388000 | -0.72890300 |
| N(Fragment=2) | -2.27066800 | -0.94687600 | 1.42536100  |
| H(Fragment=2) | -2.78347400 | -0.57805500 | 2.20618900  |
| H(Fragment=2) | -1.25897700 | -0.93076700 | 1.43477800  |
| O(Fragment=1) | -4.13768000 | -0.85352700 | 0.12871000  |
| H(Fragment=1) | -0.71458800 | 1.65032900  | 1.21670500  |
| H(Fragment=1) | 1.50793600  | 2.36355500  | 2.32312100  |

1 5 1.0 6 1.5 32 1.0  
2 6 2.0  
3 8 2.0  
4 5 1.0 11 1.0 12 1.0 33 1.0  
5 8 1.0 10 1.0  
6 7 1.0  
7 13 1.0 14 1.0 15 1.0  
8 19 1.5  
9 16 1.0 17 1.0 18 1.0 19 1.0  
10  
11  
12  
13  
14  
15  
16  
17  
18  
19 20 1.0  
20 21 1.0 22 1.0 23 1.0  
21  
22  
23  
24 25 1.5 28 1.5 31 2.0  
25 26 1.0 27 1.0  
26  
27  
28 29 1.0 30 1.0  
29  
30  
31  
32  
33

## Coordinates of structures of Ac-Pro<sub>2</sub>-NMe<sub>2</sub> in a PPII conformation as a function of ring pucker and explicit solvation

### Ac-Pro2-NMe2-trans-nn-4HF

M062X/6311pp2d2p/H2O optimized

```
0 1
C      -4.68874034  0.33955575 -0.89860260
C      -3.45905197  0.30188707 -0.04240630
O      -3.03113259  1.30588020  0.56477785
H      -5.36060914 -0.47751878 -0.64176940
N      -2.80089581 -0.84996188  0.05580188
C      -1.59507189 -0.95043371  0.86663137
C      -0.48043791 -0.09427131  0.27944079
O      -0.42854716  0.20481407 -0.92399870
C      -1.25386063 -2.45079543  0.80439575
C      -1.81461804 -2.87600131 -0.55531213
C      -3.12432071 -2.10000013 -0.64942231
H      -3.41873812 -1.88664025 -1.67251447
H      -1.80095810 -0.61022639  1.87910520
H      -1.78449985 -2.95885057  1.60874017
H      -1.96583939 -3.94899031 -0.63095679
H      -3.93410483 -2.61688189 -0.13258499
H      -0.18923584 -2.63569895  0.91907912
H      -1.14593541 -2.55984629 -1.35658170
N       0.48068065  0.31050769  1.10690826
C       1.49421338  1.24442256  0.62906172
C       2.44711461  0.57709629 -0.35264015
O       2.64370050 -0.66412368 -0.29553330
C       2.21029037  1.68753955  1.92104501
C       1.99297359  0.51073434  2.87597674
C       0.57532285  0.04990812  2.55412952
H       0.41911103 -1.00524395  2.76067521
H       0.99581827  2.06735742  0.12378355
H       1.72209817  2.58407546  2.29959491
H       2.10209464  0.79539477  3.91839375
H      -0.16794527  0.64612039  3.08558153
H       3.26148493  1.91159847  1.75590084
H       2.69650942 -0.29193176  2.65839691
N       3.06614929  1.33036908 -1.23910128
C       3.92200185  0.70664614 -2.24812973
H       4.91368678  0.51147335 -1.84234838
H       4.00221748  1.38837551 -3.08886268
H       3.47850516 -0.22548865 -2.58464687
C       2.96090634  2.78956330 -1.28119644
H       2.18025352  3.09653270 -1.97599013
H       3.91536340  3.18157614 -1.62044948
H       2.76405321  3.20009150 -0.29741173
F       4.54651669 -2.12769686 -1.06955948
H       3.84604750 -1.53157133 -0.81733649
F       1.98202518 -2.36969264  1.37357912
H       2.17020116 -1.65957748  0.75013543
H      -4.39182702  0.22093449 -1.94083990
H      -5.19291330  1.29136785 -0.76803267
F      -2.02034316 -0.18685099 -2.74364305
H      -1.41876956 -0.06031456 -1.98889497
F      -4.25786895  3.38583068  0.38450725
H      -3.76307049  2.53549507  0.45082314
```

```
1 2 1.0 4 1.0 46 1.0 47 1.0
2 3 2.0 5 1.5
3
4
5 6 1.0 11 1.0
6 7 1.0 9 1.0 13 1.0
```

7 8 2.0 19 1.5  
 8  
 9 10 1.0 14 1.0 17 1.0  
 10 11 1.0 15 1.0 18 1.0  
 11 12 1.0 16 1.0  
 12  
 13  
 14  
 15  
 16  
 17  
 18  
 19 20 1.0 25 1.0  
 20 21 1.0 23 1.0 27 1.0  
 21 22 2.0 33 1.5  
 22  
 23 24 1.0 28 1.0 31 1.0  
 24 25 1.0 29 1.0 32 1.0  
 25 26 1.0 30 1.0  
 26  
 27  
 28  
 29  
 30  
 31  
 32  
 33 34 1.0 38 1.0  
 34 35 1.0 36 1.0 37 1.0  
 35  
 36  
 37  
 38 39 1.0 40 1.0 41 1.0  
 39  
 40  
 41  
 42 43 1.0  
 43  
 44 45 1.0  
 45  
 46  
 47  
 48 49 1.0  
 49  
 50 51 1.0  
 51

**Ac-Pro2-NMe2-trans-nn-5HF**

M062X/6311pp2d2p/H2O optimized

|     |             |             |             |
|-----|-------------|-------------|-------------|
| 0 1 |             |             |             |
| C   | -4.69348659 | 0.38650585  | -0.91438406 |
| C   | -3.46548019 | 0.44339234  | -0.05723307 |
| O   | -2.98853245 | 1.51474464  | 0.36799056  |
| H   | -5.40492614 | -0.33556706 | -0.51722542 |
| N   | -2.85791615 | -0.70389279 | 0.24123681  |
| C   | -1.67324002 | -0.71567542 | 1.08681684  |
| C   | -0.50694782 | -0.02154958 | 0.39890030  |
| O   | -0.45717257 | 0.06315460  | -0.85003943 |
| C   | -1.40083561 | -2.21938908 | 1.29454254  |
| C   | -1.99037988 | -2.85789365 | 0.03396130  |
| C   | -3.25927431 | -2.04752438 | -0.20391270 |
| H   | -3.56146850 | -2.02463520 | -1.24646512 |
| H   | -1.88085691 | -0.19822222 | 2.02056196  |
| H   | -1.94826615 | -2.54687628 | 2.17732134  |
| H   | -2.19430227 | -3.91748162 | 0.15763297  |
| H   | -4.08596320 | -2.40782142 | 0.41003268  |

|   |             |             |             |
|---|-------------|-------------|-------------|
| H | -0.34585146 | -2.43266671 | 1.44309321  |
| H | -1.31032450 | -2.72987821 | -0.80897914 |
| N | 0.45917183  | 0.45392971  | 1.16526617  |
| C | 1.58053096  | 1.21029157  | 0.60766461  |
| C | 2.55592933  | 0.29360164  | -0.13059949 |
| O | 2.42990906  | -0.95539462 | -0.03793538 |
| C | 2.21263210  | 1.86700453  | 1.84888609  |
| C | 1.90075101  | 0.87103398  | 2.96644632  |
| C | 0.48400910  | 0.41250243  | 2.64403783  |
| H | 0.27655536  | -0.59303182 | 2.99823906  |
| H | 1.19362963  | 1.94205080  | -0.09819097 |
| H | 1.71757986  | 2.81925480  | 2.03191557  |
| H | 1.96707282  | 1.31667012  | 3.95437445  |
| H | -0.25827062 | 1.10841725  | 3.03549435  |
| H | 3.27650735  | 2.04696826  | 1.72122779  |
| H | 2.58141174  | 0.02142386  | 2.92154960  |
| N | 3.52482097  | 0.83351191  | -0.83795595 |
| C | 4.45049526  | -0.03694655 | -1.56097410 |
| H | 4.71630114  | -0.89045744 | -0.94529240 |
| H | 5.34299378  | 0.53559568  | -1.79260304 |
| H | 3.99202129  | -0.38470571 | -2.48644253 |
| C | 3.64998849  | 2.25799030  | -1.13051997 |
| H | 3.44163141  | 2.42048032  | -2.18667401 |
| H | 4.66767758  | 2.57026216  | -0.90697675 |
| H | 2.96786589  | 2.85309928  | -0.53778952 |
| F | 2.78957265  | -2.72898735 | -1.80205066 |
| H | 2.68708069  | -2.03824412 | -1.15456664 |
| F | 1.82227602  | -2.23658787 | 2.00329195  |
| H | 2.02238019  | -1.71351604 | 1.22190209  |
| H | -4.40723294 | 0.06587296  | -1.91631412 |
| H | -5.14847171 | 1.37028375  | -0.96210473 |
| F | -2.07355137 | -0.65522426 | -2.63319792 |
| H | -1.50741854 | -0.41171193 | -1.90223456 |
| F | -4.13006237 | 3.59077304  | -0.16127851 |
| H | -3.67070140 | 2.74658474  | 0.04658166  |
| F | 1.09483478  | 1.13552552  | -2.51092717 |
| H | 0.52139846  | 0.73341729  | -1.86235694 |

1 2 1.0 4 1.0 46 1.0 47 1.0  
2 3 2.0 5 1.5  
3  
4  
5 6 1.0 11 1.0  
6 7 1.0 9 1.0 13 1.0  
7 8 2.0 19 1.5  
8  
9 10 1.0 14 1.0 17 1.0  
10 11 1.0 15 1.0 18 1.0  
11 12 1.0 16 1.0  
12  
13  
14  
15  
16  
17  
18  
19 20 1.0 25 1.0  
20 21 1.0 23 1.0 27 1.0  
21 22 2.0 33 1.5  
22  
23 24 1.0 28 1.0 31 1.0  
24 25 1.0 29 1.0 32 1.0  
25 26 1.0 30 1.0  
26  
27  
28  
29

30  
 31  
 32  
 33 34 1.0 38 1.0  
 34 35 1.0 36 1.0 37 1.0  
 35  
 36  
 37  
 38 39 1.0 40 1.0 41 1.0  
 39  
 40  
 41  
 42 43 1.0  
 43  
 44 45 1.0  
 45  
 46  
 47  
 48 49 1.0  
 49  
 50 51 1.0  
 51  
 52 53 1.0  
 53

**Ac-Pro2-NMe2-trans-nn-6HF**

M062X/6311pp2d2p/H2O optimized

0 1  
 C 4.69938648 0.20035165 -1.03940956  
 C 3.49403652 -0.09866311 -0.20519029  
 O 3.18578065 -1.28658539 0.07490780  
 H 5.32305750 0.94918966 -0.55466323  
 N 2.76075355 0.91650034 0.22208803  
 C 1.60595203 0.74919360 1.10053061  
 C 0.43035168 0.12058750 0.36467983  
 O 0.41663073 0.05688711 -0.88589157  
 C 1.29255862 2.19257401 1.54346564  
 C 1.75113551 3.02335818 0.34413328  
 C 3.04147972 2.33519554 -0.07893336  
 H 3.26727523 2.45489316 -1.13396410  
 H 1.86921038 0.10567115 1.93936321  
 H 1.89433994 2.42319829 2.42122101  
 H 1.90776610 4.06869429 0.59245602  
 H 3.88905092 2.66982935 0.51975149  
 H 0.24345087 2.33155904 1.78735922  
 H 1.01752066 2.96326741 -0.46111613  
 N -0.56274877 -0.34396411 1.10005003  
 C -1.61866092 -1.16387129 0.50510463  
 C -2.66607594 -0.30319664 -0.19756240  
 O -2.64554702 0.94635749 -0.05102680  
 C -2.19723321 -1.92650609 1.71230918  
 C -1.94833643 -0.97061767 2.87879755  
 C -0.56296059 -0.41737776 2.57648418  
 H -0.39382534 0.56459982 3.00707473  
 H -1.16540515 -1.83310239 -0.22343063  
 H -1.63152151 -2.84741429 1.84491521  
 H -1.98467663 -1.46783593 3.84339089  
 H 0.21632608 -1.11123829 2.89305913  
 H -3.24610338 -2.17542163 1.57689087  
 H -2.67861502 -0.16145023 2.87407736  
 N -3.58949968 -0.89343277 -0.92679252  
 C -4.58517233 -0.07188038 -1.61216322  
 H -4.94159777 0.70981535 -0.94829784  
 H -5.41457723 -0.71103971 -1.89702481  
 H -4.15095784 0.37916092 -2.50422565

|   |             |             |             |
|---|-------------|-------------|-------------|
| C | -3.57748397 | -2.30572053 | -1.29610208 |
| H | -3.31129739 | -2.39349575 | -2.34850181 |
| H | -4.57138870 | -2.71602236 | -1.13413948 |
| H | -2.87088114 | -2.87077185 | -0.70232460 |
| F | -3.35562556 | 2.82750874  | -1.58164888 |
| H | -3.11928644 | 2.08740844  | -1.03076265 |
| F | -1.97571672 | 2.19886478  | 1.99085849  |
| H | -2.18821143 | 1.68453497  | 1.20642937  |
| H | 4.37189465  | 0.59853351  | -1.99983634 |
| H | 5.26702870  | -0.71013619 | -1.19758627 |
| F | 1.97301326  | 0.99587870  | -2.62967545 |
| H | 1.42395255  | 0.66583243  | -1.92215911 |
| F | 4.64896277  | -3.12135475 | -0.75205255 |
| H | 4.08505712  | -2.40787509 | -0.43638154 |
| F | -1.16116174 | -0.87982715 | -2.61469491 |
| H | -0.58242166 | -0.52977411 | -1.94353193 |
| F | 1.27166470  | -2.50721192 | 1.11538301  |
| H | 1.99629197  | -2.01289558 | 0.73023216  |

1 2 1.0 4 1.0 46 1.0 47 1.0

2 3 2.0 5 1.5

3

4

5 6 1.0 11 1.0

6 7 1.0 9 1.0 13 1.0

7 8 2.0 19 1.5

8

9 10 1.0 14 1.0 17 1.0

10 11 1.0 15 1.0 18 1.0

11 12 1.0 16 1.0

12

13

14

15

16

17

18

19 20 1.0 25 1.0

20 21 1.0 23 1.0 27 1.0

21 22 2.0 33 1.5

22

23 24 1.0 28 1.0 31 1.0

24 25 1.0 29 1.0 32 1.0

25 26 1.0 30 1.0

26

27

28

29

30

31

32

33 34 1.0 38 1.0

34 35 1.0 36 1.0 37 1.0

35

36

37

38 39 1.0 40 1.0 41 1.0

39

40

41

42 43 1.0

43

44 45 1.0

45

46

47

48 49 1.0



49  
50 51 1.0  
51  
52 53 1.0  
53  
54 55 1.0  
55

**Ac-Pro2-NMe2-trans-nn-HF212**

M062X/6311pp2d2p/H2O optimized

0 1  
C 4.65429875 0.35321610 -1.10342763  
C 3.46665138 0.03464633 -0.25152047  
O 3.23919605 -1.15008701 0.11391237  
H 5.20466087 1.19814638 -0.69442806  
N 2.66582871 1.02445183 0.10137898  
C 1.50608381 0.84164649 0.97047312  
C 0.37693599 0.12419340 0.23883046  
O 0.35823195 -0.01300895 -0.99369851  
C 1.11681129 2.28730767 1.33189316  
C 1.51638791 3.06610740 0.07733332  
C 2.84115710 2.42838614 -0.32141579  
H 3.03613208 2.47206781 -1.38883076  
H 1.78449169 0.25204213 1.84337271  
H 1.71307066 2.60423831 2.18643496  
H 1.61548651 4.13232121 0.25762165  
H 3.67648921 2.86848596 0.22391840  
H 0.06324833 2.38190358 1.57812142  
H 0.77856347 2.91423545 -0.71122483  
N -0.61506029 -0.35180388 0.98595060  
C -1.58179164 -1.25874597 0.37704347  
C -2.59912720 -0.49866515 -0.46220578  
O -2.80468949 0.72264348 -0.24349246  
C -2.23216629 -1.95991737 1.58700942  
C -2.04964548 -0.95183943 2.72419936  
C -0.66302458 -0.37922799 2.45746153  
H -0.53231629 0.61920411 2.86440793  
H -1.04145060 -1.95029728 -0.26435770  
H -1.67903068 -2.87422049 1.79592375  
H -2.12089752 -1.41115852 3.70577744  
H 0.11819355 -1.04337161 2.83021895  
H -3.27299474 -2.21735061 1.40593177  
H -2.79427202 -0.15949247 2.65355393  
N -3.26796798 -1.14469414 -1.39651012  
C -4.21794265 -0.40428737 -2.22644365  
H -5.10172824 -0.13695887 -1.64926900  
H -4.50674756 -1.03771230 -3.05840287  
H -3.75234063 0.50001280 -2.60926290  
C -3.15750417 -2.57825591 -1.65883789  
H -2.62399912 -2.74482644 -2.59318291  
H -4.16187660 -2.98640302 -1.74303524  
H -2.65154111 -3.09379222 -0.85237432  
F -4.47935107 2.45284549 -0.99307821  
H -3.87533221 1.75311923 -0.75885542  
F -2.15440677 2.15794890 1.67867514  
H -2.33203516 1.55354616 0.95109617  
H 4.30356905 0.62322714 -2.09967807  
H 5.30070416 -0.51549949 -1.16680379  
F 1.90364732 0.74402269 -2.74476798  
H 1.31960586 0.46618542 -2.02032686  
F 4.86068899 -2.92056574 -0.50997395  
H 4.23250878 -2.22778282 -0.27324265  
F 1.37408164 -2.41671480 1.18169974  
H 2.07364083 -1.89714142 0.78204047

1 2 1.0 4 1.0 46 1.0 47 1.0  
 2 3 2.0 5 1.5  
 3  
 4  
 5 6 1.0 11 1.0  
 6 7 1.0 9 1.0 13 1.0  
 7 8 2.0 19 1.5  
 8  
 9 10 1.0 14 1.0 17 1.0  
 10 11 1.0 15 1.0 18 1.0  
 11 12 1.0 16 1.0  
 12  
 13  
 14  
 15  
 16  
 17  
 18  
 19 20 1.0 25 1.0  
 20 21 1.0 23 1.0 27 1.0  
 21 22 2.0 33 2.0  
 22  
 23 24 1.0 28 1.0 31 1.0  
 24 25 1.0 29 1.0 32 1.0  
 25 26 1.0 30 1.0  
 26  
 27  
 28  
 29  
 30  
 31  
 32  
 33 34 1.0 38 1.0  
 34 35 1.0 36 1.0 37 1.0  
 35  
 36  
 37  
 38 39 1.0 40 1.0 41 1.0  
 39  
 40  
 41  
 42 43 1.0  
 43  
 44 45 1.0  
 45  
 46  
 47  
 48 49 1.0  
 49  
 50 51 1.0  
 51  
 52 53 1.0  
 53

**Ac-Pro2-NMe2-trans-nn-HF221**

M062X/6311pp2d2p/H2O optimized

|     |            |             |             |
|-----|------------|-------------|-------------|
| 0 1 |            |             |             |
| C   | 4.59441785 | -0.49558081 | -0.76687700 |
| C   | 3.32570805 | -0.31830306 | 0.00564119  |
| O   | 2.88313570 | -1.24244300 | 0.73741519  |
| H   | 5.26621985 | 0.34404963  | -0.59832497 |
| N   | 2.67842967 | 0.82989704  | -0.10721575 |
| C   | 1.47435609 | 1.13695328  | 0.65919679  |
| C   | 0.27346274 | 0.34667888  | 0.15650365  |
| O   | 0.30195218 | -0.21778220 | -0.96252441 |

|   |             |             |             |
|---|-------------|-------------|-------------|
| C | 1.29228796  | 2.65039755  | 0.43002382  |
| C | 1.88138942  | 2.85549515  | -0.96641599 |
| C | 3.11060866  | 1.95555392  | -0.96003792 |
| H | 3.38412736  | 1.59277150  | -1.94621977 |
| H | 1.63348371  | 0.89137728  | 1.70825386  |
| H | 1.87860571  | 3.18536112  | 1.17554468  |
| H | 2.13424762  | 3.89216853  | -1.16771809 |
| H | 3.96584122  | 2.45011304  | -0.49876650 |
| H | 0.25291051  | 2.95640634  | 0.50844582  |
| H | 1.17725471  | 2.51566266  | -1.72703760 |
| N | -0.78080424 | 0.28953614  | 0.94611135  |
| C | -1.89115458 | -0.62481312 | 0.66922727  |
| C | -2.85717238 | -0.04159197 | -0.36358139 |
| O | -2.78472362 | 1.15308340  | -0.70217558 |
| C | -2.55522773 | -0.79062678 | 2.04985511  |
| C | -2.26843266 | 0.54644021  | 2.73362188  |
| C | -0.83438997 | 0.83750983  | 2.31749487  |
| H | -0.59774857 | 1.89690359  | 2.31495894  |
| H | -1.47928646 | -1.55926526 | 0.29224989  |
| H | -2.06116686 | -1.60405893 | 2.57934599  |
| H | -2.37616321 | 0.49859897  | 3.81310816  |
| H | -0.12735771 | 0.29103289  | 2.94266144  |
| H | -3.61617745 | -1.01131461 | 1.97288696  |
| H | -2.92938603 | 1.32260859  | 2.34809959  |
| N | -3.78871320 | -0.85086115 | -0.85723568 |
| C | -4.67755044 | -0.36399267 | -1.90542180 |
| H | -4.75074454 | 0.71513886  | -1.85148881 |
| H | -5.65954163 | -0.80873362 | -1.76456779 |
| H | -4.28934048 | -0.65617386 | -2.88247019 |
| C | -3.81207338 | -2.29482984 | -0.65181540 |
| H | -3.28347133 | -2.79387902 | -1.46373032 |
| H | -4.84965261 | -2.61926261 | -0.64323118 |
| H | -3.36692758 | -2.57499742 | 0.29547369  |
| F | -1.95005899 | 3.04963979  | 0.57042095  |
| H | -2.23967453 | 2.25643288  | 0.07532955  |
| H | 4.35270068  | -0.53269049 | -1.82911374 |
| H | 5.07605397  | -1.42080742 | -0.46968725 |
| F | 2.05984133  | -0.31968055 | -2.75805180 |
| H | 1.43339465  | -0.24079242 | -2.04076615 |
| F | 4.23233997  | -3.31473760 | 0.97990455  |
| H | 3.71270255  | -2.50975642 | 0.87852400  |
| F | -1.31682626 | -1.52898897 | -2.36713564 |
| H | -0.73683302 | -1.02472999 | -1.80235668 |
| F | 0.77749547  | -1.85173379 | 1.95212933  |
| H | 1.56812840  | -1.58126692 | 1.48735847  |

1 2 1.0 4 1.0 44 1.0 45 1.0  
2 3 2.0 5 1.5  
3  
4  
5 6 1.0 11 1.0  
6 7 1.0 9 1.0 13 1.0  
7 8 2.0 19 1.5  
8  
9 10 1.0 14 1.0 17 1.0  
10 11 1.0 15 1.0 18 1.0  
11 12 1.0 16 1.0  
12  
13  
14  
15  
16  
17  
18  
19 20 1.0 25 1.0  
20 21 1.0 23 1.0 27 1.0  
21 22 2.0 33 1.5

22  
 23 24 1.0 28 1.0 31 1.0  
 24 25 1.0 29 1.0 32 1.0  
 25 26 1.0 30 1.0  
 26  
 27  
 28  
 29  
 30  
 31  
 32  
 33 34 1.0 38 1.0  
 34 35 1.0 36 1.0 37 1.0  
 35  
 36  
 37  
 38 39 1.0 40 1.0 41 1.0  
 39  
 40  
 41  
 42 43 1.0  
 43  
 44  
 45  
 46 47 1.0  
 47  
 48 49 1.0  
 49  
 50 51 1.0  
 51  
 52 53 1.0  
 53

**Ac-Pro2-NMe2-trans-nn-HF3**

M062X/6311pp2d2p/H2O optimized

0 1  
 C -4.81280420 1.49407933 0.09294188  
 C -3.58269251 0.84447534 0.66809841  
 O -3.03971201 1.24294103 1.69701955  
 H -5.58298328 0.75363062 -0.11924322  
 N -3.08539464 -0.20976461 -0.01133292  
 C -1.90677602 -0.90104542 0.47520828  
 C -0.67582873 -0.00819831 0.39462182  
 O -0.58765690 0.94719506 -0.39306455  
 C -1.78889052 -2.10799860 -0.47537341  
 C -2.40126755 -1.57878845 -1.77467896  
 C -3.58268332 -0.74642157 -1.28451124  
 H -3.83890193 0.06241353 -1.96311871  
 H -2.04643994 -1.20130162 1.51200952  
 H -2.39496886 -2.92063057 -0.07601733  
 H -2.70526180 -2.37191956 -2.45212630  
 H -4.46317513 -1.36926276 -1.11334553  
 H -0.76535558 -2.45737325 -0.58142034  
 H -1.68924517 -0.93284718 -2.28982035  
 N 0.35175144 -0.30720828 1.18918076  
 C 1.50387785 0.58442966 1.24417990  
 C 2.31144444 0.52681759 -0.04591668  
 O 2.27310774 -0.50143555 -0.76883421  
 C 2.30150005 0.06623157 2.45790710  
 C 1.89849459 -1.40799585 2.55135292  
 C 0.41957877 -1.39580193 2.17886442  
 H 0.09016119 -2.33261704 1.73780608  
 H 1.14864668 1.60202264 1.38202414  
 H 1.97745686 0.60943278 3.34399707  
 H 2.06641757 -1.82405624 3.54051731

|   |             |             |             |
|---|-------------|-------------|-------------|
| H | -0.20551596 | -1.15239680 | 3.03932625  |
| H | 3.37318855  | 0.20788473  | 2.34014482  |
| H | 2.45331112  | -2.00036181 | 1.82517465  |
| N | 3.05463376  | 1.56484398  | -0.37487666 |
| C | 3.76483722  | 1.55792904  | -1.65356272 |
| H | 4.65640750  | 0.93524716  | -1.59643921 |
| H | 4.04995924  | 2.57854115  | -1.88703277 |
| H | 3.11220172  | 1.18211165  | -2.43640457 |
| C | 3.23015335  | 2.74909998  | 0.46534127  |
| H | 2.57887734  | 3.55401339  | 0.12769606  |
| H | 4.26560102  | 3.06798200  | 0.38208763  |
| H | 3.03296750  | 2.52765534  | 1.50744088  |
| F | 3.66978120  | -1.39911419 | -2.66695933 |
| H | 3.17512189  | -0.99751858 | -1.95751577 |
| F | 1.43843924  | -2.79456232 | -0.33051162 |
| H | 1.70333948  | -1.87560198 | -0.44260547 |
| H | -4.55080352 | 1.98759963  | -0.84298158 |
| H | -5.18784199 | 2.22618726  | 0.80027300  |
| F | -2.23199138 | 1.94211948  | -1.90930330 |
| H | -1.62573123 | 1.49960250  | -1.28806041 |

1 2 1.0 4 1.0 46 1.0 47 1.0

2 3 2.0 5 1.5

3

4

5 6 1.0 11 1.0

6 7 1.0 9 1.0 13 1.0

7 8 2.0 19 1.5

8

9 10 1.0 14 1.0 17 1.0

10 11 1.0 15 1.0 18 1.0

11 12 1.0 16 1.0

12

13

14

15

16

17

18

19 20 1.0 25 1.0

20 21 1.0 23 1.0 27 1.0

21 22 2.0 33 1.5

22

23 24 1.0 28 1.0 31 1.0

24 25 1.0 29 1.0 32 1.0

25 26 1.0 30 1.0

26

27

28

29

30

31

32

33 34 1.0 38 1.0

34 35 1.0 36 1.0 37 1.0

35

36

37

38 39 1.0 40 1.0 41 1.0

39

40

41

42 43 1.0

43

44 45 1.0

45

46

47  
48 49 1.0  
49

**Ac-Pro2-NMe2-trans-nn**

M062X/6311pp2d2p/H2O optimized

0 1  
C -4.61988885 -0.32445362 -1.70233814  
C -3.43347815 0.37396680 -1.08733222  
O -2.92995911 1.37821962 -1.59003509  
H -5.39282026 -0.51834807 -0.96001426  
N -2.94489779 -0.15890208 0.04797847  
C -1.77884076 0.42094164 0.68818727  
C -0.52036475 0.17654111 -0.14296589  
O -0.43624768 -0.76670591 -0.92252618  
C -1.68517433 -0.35367905 2.01485229  
C -2.25521466 -1.72728544 1.64966438  
C -3.40115467 -1.39418266 0.69487568  
H -3.57196423 -2.17792719 -0.03990640  
H -1.92590923 1.48870926 0.83414029  
H -2.30953570 0.13646368 2.76117682  
H -2.59162386 -2.28937555 2.51670046  
H -4.33180621 -1.21449399 1.23713957  
H -0.66442255 -0.40464558 2.38847580  
H -1.49980146 -2.31056604 1.12484541  
N 0.50391544 1.01833817 0.07699155  
C 1.79621161 0.74989354 -0.52773592  
C 2.42765608 -0.49135441 0.12347896  
O 2.03680515 -0.87697906 1.22044545  
C 2.59781504 2.01915645 -0.19762293  
C 2.03945213 2.42670121 1.16801552  
C 0.54609799 2.11522943 1.05475638  
H 0.11927077 1.81149795 2.00854369  
H 1.67058672 0.59045084 -1.59498664  
H 2.38160539 2.78166956 -0.94546833  
H 2.22214643 3.47137468 1.40436884  
H -0.01200522 2.97395897 0.67777799  
H 3.67104640 1.84404774 -0.18166123  
H 2.48407580 1.81058792 1.94796597  
N 3.43913026 -1.08025987 -0.54744497  
C 4.05429056 -2.29018395 -0.02607090  
H 5.11894848 -2.12532526 0.14057310  
H 3.93570856 -3.10120428 -0.74589213  
H 3.57722295 -2.56087724 0.90803702  
C 3.89735891 -0.67270600 -1.86796089  
H 3.37771500 -1.22359270 -2.65414298  
H 4.96167788 -0.88804627 -1.94041995  
H 3.76548235 0.39172476 -2.02908377  
H -4.30806086 -1.28388958 -2.11655150  
H -5.01795617 0.29578551 -2.49818818

1 2 1.0 4 1.0 42 1.0 43 1.0  
2 3 2.0 5 1.5  
3  
4  
5 6 1.0 11 1.0  
6 7 1.0 9 1.0 13 1.0  
7 8 2.0 19 1.5  
8  
9 10 1.0 14 1.0 17 1.0  
10 11 1.0 15 1.0 18 1.0  
11 12 1.0 16 1.0  
12  
13  
14

15  
16  
17  
18  
19 20 1.0 25 1.0  
20 21 1.0 23 1.0 27 1.0  
21 22 2.0 33 1.5  
22  
23 24 1.0 28 1.0 31 1.0  
24 25 1.0 29 1.0 32 1.0  
25 26 1.0 30 1.0  
26  
27  
28  
29  
30  
31  
32  
33 34 1.0 38 1.0  
34 35 1.0 36 1.0 37 1.0  
35  
36  
37  
38 39 1.0 40 1.0 41 1.0  
39  
40  
41  
42  
43

**Ac-Pro2-NMe2-trans-nn-P2HFHF**

M062X/6311pp2d2p/H2O optimized

0 1  
C 4.82267444 -1.27375798 -1.37409855  
C 3.69766664 -1.10988774 -0.38417702  
O 3.23926714 -2.05792233 0.25241076  
H 5.59470117 -0.52012194 -1.22645572  
N 3.20891770 0.13505402 -0.22967627  
C 2.09170498 0.37508931 0.66434947  
C 0.81649458 -0.25245266 0.10003861  
O 0.67879605 -0.49676764 -1.09207053  
C 1.99742894 1.90896702 0.69916367  
C 2.46292705 2.30816925 -0.70407771  
C 3.59936137 1.32697826 -0.99190808  
H 3.69540490 1.09751163 -2.05094457  
H 2.29720362 -0.05394834 1.64300007  
H 2.69243543 2.28472229 1.44994427  
H 2.78979823 3.34285195 -0.76254495  
H 4.55491895 1.71015208 -0.62858370  
H 0.99717411 2.25879032 0.94152661  
H 1.65701491 2.15674764 -1.42113517  
N -0.17295603 -0.49626940 0.98470256  
C -1.34603763 -1.23113064 0.54384067  
C -2.22443663 -0.38794009 -0.36972770  
O -2.20273934 0.86709849 -0.28770950  
C -2.06457830 -1.59350458 1.86045358  
C -1.59569913 -0.50874375 2.83457435  
C -0.13921702 -0.28630416 2.43841198  
H 0.20710283 0.71686529 2.67377246  
H -1.02680208 -2.11068023 -0.00996216  
H -1.72003040 -2.57363307 2.18656980  
H -1.69891552 -0.80823983 3.87370758  
H 0.51686628 -1.01935561 2.91237089  
H -3.14588721 -1.62917432 1.74835834  
H -2.15890819 0.41066812 2.67871609

|   |             |             |             |
|---|-------------|-------------|-------------|
| N | -3.01861455 | -1.00082161 | -1.22638485 |
| C | -3.81016946 | -0.20001775 | -2.15996845 |
| H | -4.64652979 | 0.27303163  | -1.64765722 |
| H | -4.18619530 | -0.85639111 | -2.93724824 |
| H | -3.18629971 | 0.56761112  | -2.61009539 |
| C | -3.15044142 | -2.45592703 | -1.30980022 |
| H | -2.46121274 | -2.86269350 | -2.04880533 |
| H | -4.16944751 | -2.68309164 | -1.60836342 |
| H | -2.97446333 | -2.92171354 | -0.34668455 |
| F | -3.62568324 | 2.74887931  | -1.15453125 |
| H | -3.12118074 | 1.98960780  | -0.86889652 |
| F | -1.20311557 | 2.38926349  | 1.39643509  |
| H | -1.52072070 | 1.73118558  | 0.76864146  |
| H | 4.43638493  | -1.16017070 | -2.38774084 |
| H | 5.24668606  | -2.26605085 | -1.26260803 |

1 2 1.0 4 1.0 46 1.0 47 1.0  
2 3 2.0 5 1.5  
3  
4  
5 6 1.0 11 1.0  
6 7 1.0 9 1.0 13 1.0  
7 8 2.0 19 1.5  
8  
9 10 1.0 14 1.0 17 1.0  
10 11 1.0 15 1.0 18 1.0  
11 12 1.0 16 1.0  
12  
13  
14  
15  
16  
17  
18  
19 20 1.0 25 1.0  
20 21 1.0 23 1.0 27 1.0  
21 22 2.0 33 2.0  
22  
23 24 1.0 28 1.0 31 1.0  
24 25 1.0 29 1.0 32 1.0  
25 26 1.0 30 1.0  
26  
27  
28  
29  
30  
31  
32  
33 34 1.0 38 1.0  
34 35 1.0 36 1.0 37 1.0  
35  
36  
37  
38 39 1.0 40 1.0 41 1.0  
39  
40  
41  
42 43 1.0  
43  
44 45 1.0  
45  
46  
47

**Ac-Pro2-NMe2-trans-nx-4HF**

M062X/6311pp2d2p/H2O optimized



|     |             |             |             |
|-----|-------------|-------------|-------------|
| 0 1 |             |             |             |
| C   | 4.46773974  | -0.56592381 | 0.64054497  |
| C   | 3.27935259  | 0.22591227  | 0.18463630  |
| O   | 2.97340510  | 1.32725266  | 0.68728654  |
| H   | 5.06429026  | -0.88852449 | -0.21103006 |
| N   | 2.52629810  | -0.28287508 | -0.78692061 |
| C   | 1.35826323  | 0.43103243  | -1.27904591 |
| C   | 0.25072577  | 0.45222741  | -0.23584638 |
| O   | 0.22561440  | -0.32626256 | 0.73247629  |
| C   | 0.92763019  | -0.40331051 | -2.50048214 |
| C   | 1.36070431  | -1.81879175 | -2.10954762 |
| C   | 2.71026308  | -1.59292055 | -1.43324415 |
| H   | 2.94362099  | -2.34888277 | -0.68902707 |
| H   | 1.62660323  | 1.45180594  | -1.53994832 |
| H   | 1.48464419  | -0.06021604 | -3.37130547 |
| H   | 1.43591949  | -2.48742477 | -2.96228064 |
| H   | 3.51898497  | -1.53253209 | -2.16296906 |
| H   | -0.13599731 | -0.31411418 | -2.70907637 |
| H   | 0.65554216  | -2.24331535 | -1.39350202 |
| N   | -0.75946282 | 1.29378756  | -0.43373453 |
| C   | -1.90737580 | 1.27051823  | 0.47493531  |
| C   | -2.43286814 | -0.14461396 | 0.63212324  |
| O   | -2.53352083 | -0.86759192 | -0.39848098 |
| C   | -2.92603092 | 2.18413590  | -0.22256159 |
| C   | -2.03381651 | 3.19241925  | -0.94829347 |
| C   | -0.87493029 | 2.34083027  | -1.46540030 |
| H   | -1.10832410 | 1.88597349  | -2.42688101 |
| H   | -1.60664336 | 1.68142758  | 1.43476127  |
| H   | -3.60820941 | 2.63936404  | 0.48971897  |
| H   | -1.66038645 | 3.93565825  | -0.24464077 |
| H   | 0.05017245  | 2.90540552  | -1.54105438 |
| H   | -3.50263367 | 1.60598836  | -0.94431473 |
| H   | -2.55090712 | 3.70529659  | -1.75413215 |
| N   | -2.82092853 | -0.56938985 | 1.81470266  |
| C   | -3.42228139 | -1.89459565 | 1.96335210  |
| H   | -4.23088860 | -1.82377643 | 2.68522359  |
| H   | -2.67629300 | -2.60305504 | 2.32158420  |
| H   | -3.81382928 | -2.22954178 | 1.01017322  |
| C   | -2.56919010 | 0.18200766  | 3.04966964  |
| H   | -1.50350032 | 0.36049599  | 3.17410429  |
| H   | -2.91880759 | -0.42161661 | 3.87981233  |
| H   | -3.11182850 | 1.12404174  | 3.05300411  |
| F   | -1.51086258 | -3.16728342 | -0.29185131 |
| H   | -1.91291129 | -2.30229333 | -0.33474951 |
| F   | -2.49208102 | -0.03512524 | -2.71984852 |
| H   | -2.48836095 | -0.33788556 | -1.80005155 |
| H   | 4.11388563  | -1.45349028 | 1.16548588  |
| H   | 5.07161665  | 0.03869513  | 1.30931736  |
| F   | 1.73314659  | -2.12939060 | 1.42751369  |
| H   | 1.16913637  | -1.40504948 | 1.10697855  |
| F   | 4.36104082  | 2.21619867  | 2.46007353  |
| H   | 3.79945926  | 1.84656394  | 1.73818548  |

1 2 1.0 4 1.0 46 1.0 47 1.0

2 3 2.0 5 2.0

3

4

5 6 1.0 11 1.0

6 7 1.0 9 1.0 13 1.0

7 8 2.0 19 1.5

8

9 10 1.0 14 1.0 17 1.0

10 11 1.0 15 1.0 18 1.0

11 12 1.0 16 1.0

12

13

14  
 15  
 16  
 17  
 18  
 19 20 1.0 25 1.0  
 20 21 1.0 23 1.0 27 1.0  
 21 22 2.0 33 1.5  
 22  
 23 24 1.0 28 1.0 31 1.0  
 24 25 1.0 29 1.0 32 1.0  
 25 26 1.0 30 1.0  
 26  
 27  
 28  
 29  
 30  
 31  
 32  
 33 34 1.0 38 1.0  
 34 35 1.0 36 1.0 37 1.0  
 35  
 36  
 37  
 38 39 1.0 40 1.0 41 1.0  
 39  
 40  
 41  
 42 43 1.0  
 43  
 44 45 1.0  
 45  
 46  
 47  
 48 49 1.0  
 49  
 50 51 1.0  
 51

**Ac-Pro2-NMe2-trans-nx-5HF**

M062X/6311pp2d2p/H2O optimized

|     |             |             |             |
|-----|-------------|-------------|-------------|
| 0 1 |             |             |             |
| C   | -4.48013984 | 0.43746848  | -0.71502448 |
| C   | -3.25989754 | 0.37339613  | 0.15259948  |
| O   | -2.80979383 | 1.36799860  | 0.75751540  |
| H   | -5.17676388 | -0.35815175 | -0.45668296 |
| N   | -2.62987391 | -0.79464669 | 0.26217354  |
| C   | -1.43895839 | -0.91590086 | 1.08840588  |
| C   | -0.29935728 | -0.08160076 | 0.53009106  |
| O   | -0.27294967 | 0.25389537  | -0.68050878 |
| C   | -1.10433007 | -2.41995437 | 1.01776148  |
| C   | -1.67893651 | -2.84002057 | -0.33798352 |
| C   | -2.98036619 | -2.04913511 | -0.42302465 |
| H   | -3.28749690 | -1.84470933 | -1.44393322 |
| H   | -1.65338130 | -0.58803526 | 2.10193840  |
| H   | -1.62489001 | -2.92760884 | 1.82825965  |
| H   | -1.84487325 | -3.91134127 | -0.40691912 |
| H   | -3.78938399 | -2.54789532 | 0.11240373  |
| H   | -0.03829273 | -2.60935657 | 1.12098306  |
| H   | -1.00983696 | -2.53686803 | -1.14418573 |
| N   | 0.70421827  | 0.21420237  | 1.33445313  |
| C   | 1.91532620  | 0.88025173  | 0.83500302  |
| C   | 2.46981959  | 0.15741462  | -0.38318704 |
| O   | 2.32326395  | -1.09349003 | -0.46579252 |
| C   | 2.88255540  | 0.79186639  | 2.02814141  |

|   |             |             |             |
|---|-------------|-------------|-------------|
| C | 1.94516677  | 0.81465259  | 3.23442068  |
| C | 0.76770195  | -0.04656000 | 2.78873515  |
| H | 0.95285347  | -1.10631187 | 2.95626531  |
| H | 1.67459943  | 1.91308955  | 0.59058061  |
| H | 3.60161664  | 1.60573652  | 2.02282897  |
| H | 1.60724842  | 1.83188706  | 3.42782295  |
| H | -0.16224285 | 0.24748901  | 3.26553796  |
| H | 3.42150989  | -0.15491962 | 1.98862825  |
| H | 2.41213366  | 0.42509159  | 4.13402956  |
| N | 3.12793947  | 0.84887275  | -1.28650005 |
| C | 3.67420204  | 0.20412176  | -2.47977777 |
| H | 4.75221372  | 0.34901121  | -2.49863508 |
| H | 3.23413059  | 0.66984076  | -3.35979391 |
| H | 3.44652950  | -0.85360511 | -2.47110267 |
| C | 3.36252156  | 2.29437408  | -1.18848059 |
| H | 2.49257196  | 2.84432607  | -1.53883427 |
| H | 4.21811486  | 2.52827877  | -1.81395138 |
| H | 3.60425610  | 2.58078059  | -0.16997525 |
| F | 1.08788355  | -2.14399918 | -2.40986012 |
| H | 1.53950309  | -1.74196708 | -1.67584806 |
| F | 2.28246058  | -2.50931478 | 1.56320664  |
| H | 2.28216171  | -1.95406228 | 0.77326685  |
| H | -4.17966760 | 0.30133040  | -1.75426201 |
| H | -4.95852792 | 1.40408974  | -0.59674922 |
| F | -1.82923934 | -0.27039862 | -2.58290783 |
| H | -1.26078222 | -0.12828238 | -1.82709863 |
| F | -3.97356145 | 3.48619481  | 0.54907415  |
| H | -3.50536591 | 2.62431509  | 0.62721301  |
| F | 0.23322694  | 2.60621120  | -1.40900720 |
| H | 0.05313356  | 1.71113239  | -1.13301747 |

1 2 1.0 4 1.0 46 1.0 47 1.0  
2 3 2.0 5 2.0  
3  
4  
5 6 1.0 11 1.0  
6 7 1.0 9 1.0 13 1.0  
7 8 2.0 19 1.5  
8  
9 10 1.0 14 1.0 17 1.0  
10 11 1.0 15 1.0 18 1.0  
11 12 1.0 16 1.0  
12  
13  
14  
15  
16  
17  
18  
19 20 1.0 25 1.0  
20 21 1.0 23 1.0 27 1.0  
21 22 2.0 33 1.5  
22  
23 24 1.0 28 1.0 31 1.0  
24 25 1.0 29 1.0 32 1.0  
25 26 1.0 30 1.0  
26  
27  
28  
29  
30  
31  
32  
33 34 1.0 38 1.0  
34 35 1.0 36 1.0 37 1.0  
35  
36

37  
38 39 1.0 40 1.0 41 1.0  
39  
40  
41  
42 43 1.0  
43  
44 45 1.0  
45  
46  
47  
48 49 1.0  
49  
50 51 1.0  
51  
52 53 1.0  
53

**Ac-Pro2-NMe2-trans-nx-6HF**

M062X/6311pp2d2p/H2O optimized

O 1  
C 4.39069366 0.46116794 -0.98773858  
C 3.25327570 0.02641246 -0.11882976  
O 3.02942393 -1.19642377 0.08606940  
H 4.98369569 1.22307547 -0.48537122  
N 2.48329496 0.95762128 0.41835266  
C 1.36069332 0.64220101 1.29704706  
C 0.21870026 0.00348387 0.51807795  
O 0.22285673 -0.03074196 -0.73866530  
C 0.95539959 2.01922119 1.85502107  
C 1.31012303 2.96227978 0.70432717  
C 2.64125861 2.41150635 0.20740132  
H 2.82700930 2.61810463 -0.84169992  
H 1.67960419 -0.04594501 2.07756121  
H 1.56659293 2.23427889 2.73011602  
H 1.38783619 3.99906628 1.01736042  
H 3.47502291 2.77401141 0.80908243  
H -0.09272371 2.05901798 2.13864468  
H 0.56127845 2.89175381 -0.08704781  
N -0.80127874 -0.47478954 1.19890584  
C -1.95332306 -1.06284634 0.50558938  
C -2.55077454 -0.07847724 -0.48680930  
O -2.48531727 1.15527558 -0.23415470  
C -2.92291244 -1.38488214 1.65338675  
C -1.97760617 -1.70409022 2.81074286  
C -0.87627501 -0.65782859 2.66275223  
H -1.15428404 0.28554935 3.12911504  
H -1.62895686 -1.97006027 -0.00264123  
H -3.59094773 -2.20232590 1.39838396  
H -1.55752357 -2.70178625 2.68832277  
H 0.07968497 -1.00148823 3.04488502  
H -3.51830049 -0.50119004 1.88576885  
H -2.46514193 -1.64344748 3.77913645  
N -3.16558263 -0.54794329 -1.55007658  
C -3.78672226 0.35788192 -2.51619029  
H -4.78191668 -0.01257215 -2.74689535  
H -3.19069373 0.38158066 -3.42728906  
H -3.85882249 1.35387654 -2.09785801  
C -3.23741458 -1.98088125 -1.86345105  
H -2.27923396 -2.34180242 -2.22944945  
H -3.98917085 -2.11037561 -2.63441338  
H -3.54489775 -2.55145271 -0.99187349  
F -1.62769495 2.84936927 -1.89492776  
H -1.96087477 2.20786901 -1.27492878  
F -2.39309047 2.02334841 2.08218448

|   |             |             |             |
|---|-------------|-------------|-------------|
| H | -2.40530208 | 1.67609639  | 1.18113932  |
| H | 3.98510420  | 0.89241673  | -1.90316967 |
| H | 5.01233886  | -0.39381501 | -1.23088300 |
| F | 1.57577653  | 1.25408399  | -2.41846406 |
| H | 1.07857955  | 0.79617550  | -1.74245632 |
| F | 4.49247725  | -2.87843364 | -1.01158156 |
| H | 3.92690288  | -2.22313507 | -0.58908209 |
| F | -0.00956259 | -2.24864880 | -1.95369896 |
| H | 0.07754633  | -1.41189910 | -1.51344696 |
| F | 1.36980118  | -2.48438200 | 1.43726057  |
| H | 2.00679282  | -1.97960279 | 0.92780580  |

1 2 1.0 4 1.0 46 1.0 47 1.0

2 3 2.0 5 2.0

3

4

5 6 1.0 11 1.0

6 7 1.0 9 1.0 13 1.0

7 8 2.0 19 1.5

8

9 10 1.0 14 1.0 17 1.0

10 11 1.0 15 1.0 18 1.0

11 12 1.0 16 1.0

12

13

14

15

16

17

18

19 20 1.0 25 1.0

20 21 1.0 23 1.0 27 1.0

21 22 2.0 33 1.5

22

23 24 1.0 28 1.0 31 1.0

24 25 1.0 29 1.0 32 1.0

25 26 1.0 30 1.0

26

27

28

29

30

31

32

33 34 1.0 38 1.0

34 35 1.0 36 1.0 37 1.0

35

36

37

38 39 1.0 40 1.0 41 1.0

39

40

41

42 43 1.0

43

44 45 1.0

45

46

47

48 49 1.0

49

50 51 1.0

51

52 53 1.0

53

54 55 1.0

55

Ac-Pro2-NMe2-trans-nx-HF212

M062X/6311pp2d2p/H2O optimized

0 1  
C 4.36654675 -0.91955304 0.71171575  
C 3.24148518 -0.09600564 0.17015984  
O 3.06946635 1.09193272 0.55701613  
H 4.91448376 -1.39928979 -0.09701870  
N 2.43044133 -0.64696654 -0.71463782  
C 1.31608603 0.07375093 -1.32232855  
C 0.17648526 0.25676582 -0.32708071  
O 0.14282944 -0.33084104 0.76723664  
C 0.88875100 -0.85569389 -2.47238256  
C 1.19329700 -2.24339421 -1.90472967  
C 2.52794494 -2.04013630 -1.19490501  
H 2.67632820 -2.71327183 -0.35595305  
H 1.64767533 1.04812334 -1.67388902  
H 1.51340678 -0.64818832 -3.34000836  
H 1.25425413 -3.00962186 -2.67191280  
H 3.36572607 -2.12427062 -1.88753308  
H -0.15410421 -0.71947919 -2.74667992  
H 0.42750188 -2.53185890 -1.18238446  
N -0.83090952 1.03773939 -0.69545138  
C -1.94123055 1.24879552 0.23114580  
C -2.56194621 -0.07754142 0.62917925  
O -2.64351111 -0.99320534 -0.23548352  
C -2.90674007 2.12965028 -0.57409740  
C -1.95494634 2.94888376 -1.44775706  
C -0.89086636 1.93465868 -1.86258005  
H -1.19546091 1.36951642 -2.74201958  
H -1.56536324 1.77309182 1.10749403  
H -3.53575684 2.73425972 0.07325096  
H -1.49565279 3.74155979 -0.85770802  
H 0.07622664 2.39876387 -2.03142689  
H -3.54238572 1.49911127 -1.19688491  
H -2.45008189 3.39391131 -2.30583708  
N -3.04074103 -0.22636809 1.84559078  
C -3.68173214 -1.47839909 2.24544299  
H -4.57910201 -1.24175869 2.81044650  
H -3.00280530 -2.05677161 2.87084188  
H -3.94690829 -2.05223137 1.36609088  
C -2.87355739 0.78792919 2.89172033  
H -1.83059291 0.85597812 3.19595113  
H -3.46863737 0.48447028 3.74604085  
H -3.22939496 1.75721324 2.55423531  
F -1.68303431 -3.26067434 0.30534533  
H -2.05944350 -2.40737388 0.10581305  
F -2.51012566 -0.61938643 -2.67318083  
H -2.53497159 -0.73914253 -1.71315485  
H 3.94753105 -1.69778223 1.34995976  
H 5.03336335 -0.29078219 1.29193664  
F 1.55586952 -2.07964006 1.74655237  
H 1.02807667 -1.38526008 1.31939249  
F 4.66609671 2.05879786 2.18848139  
H 4.04603470 1.67616639 1.55588412  
F 1.39070592 2.87805855 0.07812268  
H 2.02516763 2.17832997 0.24750189

1 2 1.0 4 1.0 46 1.0 47 1.0  
2 3 2.0 5 2.0  
3  
4  
5 6 1.0 11 1.0  
6 7 1.0 9 1.0 13 1.0  
7 8 2.0 19 1.5

8  
 9 10 1.0 14 1.0 17 1.0  
 10 11 1.0 15 1.0 18 1.0  
 11 12 1.0 16 1.0  
 12  
 13  
 14  
 15  
 16  
 17  
 18  
 19 20 1.0 25 1.0  
 20 21 1.0 23 1.0 27 1.0  
 21 22 2.0 33 1.5  
 22  
 23 24 1.0 28 1.0 31 1.0  
 24 25 1.0 29 1.0 32 1.0  
 25 26 1.0 30 1.0  
 26  
 27  
 28  
 29  
 30  
 31  
 32  
 33 34 1.0 38 1.0  
 34 35 1.0 36 1.0 37 1.0  
 35  
 36  
 37  
 38 39 1.0 40 1.0 41 1.0  
 39  
 40  
 41  
 42 43 1.0  
 43  
 44 45 1.0  
 45  
 46  
 47  
 48 49 1.0  
 49  
 50 51 1.0  
 51  
 52 53 1.0  
 53

**Ac-Pro2-NMe2-trans-nx-HF221**

M062X/6311pp2d2p/H2O optimized

|     |            |             |             |
|-----|------------|-------------|-------------|
| 0 1 |            |             |             |
| C   | 4.39127241 | -0.48460049 | -0.92371428 |
| C   | 3.20742656 | -0.19286530 | -0.05659191 |
| O   | 2.88371116 | -0.97642522 | 0.87553068  |
| H   | 5.04744068 | 0.38261357  | -0.97518784 |
| N   | 2.50797235 | 0.90245250  | -0.29991046 |
| C   | 1.35392308 | 1.29948492  | 0.50260147  |
| C   | 0.16151641 | 0.38583547  | 0.24266730  |
| O   | 0.18429246 | -0.45950762 | -0.68670101 |
| C   | 1.08265538 | 2.74118436  | 0.03502975  |
| C   | 1.53167210 | 2.70713624  | -1.42649396 |
| C   | 2.80255429 | 1.86752313  | -1.37845724 |
| H   | 3.00434463 | 1.34095554  | -2.30569519 |
| H   | 1.60388228 | 1.24705719  | 1.56040921  |
| H   | 1.71106885 | 3.41651141  | 0.61350356  |
| H   | 1.71035350 | 3.69638864  | -1.83701852 |

|   |             |             |             |
|---|-------------|-------------|-------------|
| H | 3.66810856  | 2.46815978  | -1.09792702 |
| H | 0.04218907  | 3.02791955  | 0.15928124  |
| H | 0.78013817  | 2.20736174  | -2.04025537 |
| N | -0.90204109 | 0.53029046  | 1.00412999  |
| C | -2.07908618 | -0.32923988 | 0.81912481  |
| C | -2.64173999 | -0.18944407 | -0.59105017 |
| O | -2.53036002 | 0.89545593  | -1.19372834 |
| C | -3.05797731 | 0.18677355  | 1.88298674  |
| C | -2.12662567 | 0.66092396  | 2.99753848  |
| C | -0.99320023 | 1.34011253  | 2.23485996  |
| H | -1.24504650 | 2.36569079  | 1.97101177  |
| H | -1.77894534 | -1.35549992 | 1.02072954  |
| H | -3.75668356 | -0.58459818 | 2.19458489  |
| H | -1.73756305 | -0.19360678 | 3.55030388  |
| H | -0.05244540 | 1.30961076  | 2.77511272  |
| H | -3.61947530 | 1.02951915  | 1.47742909  |
| H | -2.61090580 | 1.33998344  | 3.69300206  |
| N | -3.26885584 | -1.22140260 | -1.13886104 |
| C | -3.80383886 | -1.09570388 | -2.49114421 |
| H | -4.85685309 | -0.81578423 | -2.45606546 |
| H | -3.70782531 | -2.06048678 | -2.98378898 |
| H | -3.24641430 | -0.34503506 | -3.03803081 |
| C | -3.60506015 | -2.47267468 | -0.46910184 |
| H | -3.08010893 | -3.29616155 | -0.94780959 |
| H | -4.67984295 | -2.62663945 | -0.55648531 |
| H | -3.34891205 | -2.45035606 | 0.58217402  |
| F | -2.19005269 | 3.04151880  | -0.11218314 |
| H | -2.29117636 | 2.15743454  | -0.52859337 |
| H | 4.04263993  | -0.70831013 | -1.93208008 |
| H | 4.93279136  | -1.33628291 | -0.52676739 |
| F | 1.63811245  | -0.61166605 | -2.71601439 |
| H | 1.11192478  | -0.51435365 | -1.92140601 |
| F | 4.25914148  | -3.01046165 | 1.25451400  |
| H | 3.72737537  | -2.22175176 | 1.10209738  |
| F | -0.61938306 | -2.85677965 | -0.54843372 |
| H | -0.33549494 | -1.95087246 | -0.60315821 |
| F | 1.04693254  | -1.03321718 | 2.56135636  |
| H | 1.75105150  | -0.99625802 | 1.90962830  |

1 2 1.0 4 1.0 44 1.0 45 1.0  
2 3 2.0 5 2.0  
3  
4  
5 6 1.0 11 1.0  
6 7 1.0 9 1.0 13 1.0  
7 8 2.0 19 1.5  
8  
9 10 1.0 14 1.0 17 1.0  
10 11 1.0 15 1.0 18 1.0  
11 12 1.0 16 1.0  
12  
13  
14  
15  
16  
17  
18  
19 20 1.0 25 1.0  
20 21 1.0 23 1.0 27 1.0  
21 22 2.0 33 1.5  
22  
23 24 1.0 28 1.0 31 1.0  
24 25 1.0 29 1.0 32 1.0  
25 26 1.0 30 1.0  
26  
27  
28



29  
 30  
 31  
 32  
 33 34 1.0 38 1.0  
 34 35 1.0 36 1.0 37 1.0  
 35  
 36  
 37  
 38 39 1.0 40 1.0 41 1.0  
 39  
 40  
 41  
 42 43 1.0  
 43  
 44  
 45  
 46 47 1.0  
 47  
 48 49 1.0  
 49  
 50 51 1.0  
 51  
 52 53 1.0  
 53

**Ac-Pro2-NMe2-trans-nx-HF3**

M062X/6311pp2d2p/H2O optimized

0 1  
 C -4.53566189 -0.64657304 -1.39793351  
 C -3.31707040 0.21965499 -1.22208759  
 O -2.77315590 0.80030328 -2.15971286  
 H -5.31285989 -0.37848173 -0.68339640  
 N -2.83134050 0.32719503 0.03214136  
 C -1.66175248 1.14231489 0.29350930  
 C -0.41201924 0.52748692 -0.31789721  
 O -0.34029703 -0.67219257 -0.63577245  
 C -1.56261311 1.13869293 1.83127923  
 C -2.16519841 -0.21843520 2.20543013  
 C -3.33101323 -0.36101309 1.22896689  
 H -3.56299483 -1.39759146 1.00057697  
 H -1.79875197 2.14196411 -0.11202566  
 H -2.17684009 1.94946801 2.22111975  
 H -2.48718893 -0.26464332 3.24227140  
 H -4.22717233 0.13717620 1.60436995  
 H -0.54220851 1.27607663 2.18288406  
 H -1.43759757 -1.01231359 2.03078447  
 N 0.66109799 1.30553159 -0.43546661  
 C 1.92030942 0.73749974 -0.91964939  
 C 2.27010290 -0.51950699 -0.14426414  
 O 2.12059002 -0.51438064 1.10977187  
 C 2.93368885 1.86401012 -0.66838851  
 C 2.08489681 3.12528239 -0.83466891  
 C 0.75393957 2.75450144 -0.18106109  
 H 0.76671370 2.93942120 0.89201904  
 H 1.82743791 0.52532626 -1.98117522  
 H 3.77150585 1.80904701 -1.35759711  
 H 1.93070167 3.33457207 -1.89254068  
 H -0.08515007 3.27548045 -0.63361796  
 H 3.30969304 1.79586027 0.35219211  
 H 2.53617195 3.99734339 -0.37035000  
 N 2.76810624 -1.55994283 -0.77658131  
 C 3.18203430 -2.74954640 -0.03329735  
 H 4.10184049 -3.12639569 -0.47182241  
 H 2.40908759 -3.51452901 -0.09948560

|   |             |             |             |
|---|-------------|-------------|-------------|
| H | 3.35385552  | -2.49325435 | 1.00511359  |
| C | 2.81970004  | -1.64889605 | -2.24017093 |
| H | 1.81944923  | -1.57444088 | -2.66138349 |
| H | 3.23415347  | -2.61741479 | -2.49713955 |
| H | 3.46191112  | -0.87695095 | -2.65656291 |
| F | 0.83625289  | -2.40811677 | 2.16588668  |
| H | 1.33127500  | -1.69533348 | 1.76843039  |
| F | 1.82060187  | 1.50763675  | 2.48553342  |
| H | 1.92324552  | 0.72926705  | 1.91750488  |
| H | -4.26169516 | -1.68732819 | -1.22356118 |
| H | -4.90727465 | -0.53044324 | -2.41042069 |
| F | -1.96009731 | -2.50206888 | -0.48470417 |
| H | -1.36632679 | -1.73110506 | -0.52017916 |

1 2 1.0 4 1.0 46 1.0 47 1.0

2 3 2.0 5 2.0

3

4

5 6 1.0 11 1.0

6 7 1.0 9 1.0 13 1.0

7 8 2.0 19 1.5

8

9 10 1.0 14 1.0 17 1.0

10 11 1.0 15 1.0 18 1.0

11 12 1.0 16 1.0

12

13

14

15

16

17

18

19 20 1.0 25 1.0

20 21 1.0 23 1.0 27 1.0

21 22 2.0 33 1.5

22

23 24 1.0 28 1.0 31 1.0

24 25 1.0 29 1.0 32 1.0

25 26 1.0 30 1.0

26

27

28

29

30

31

32

33 34 1.0 38 1.0

34 35 1.0 36 1.0 37 1.0

35

36

37

38 39 1.0 40 1.0 41 1.0

39

40

41

42 43 1.0

43

44 45 1.0

45

46

47

48 49 1.0

49

#### Ac-Pro2-NMe2-trans-nx

M062X/6311pp2d2p/H2O optimized

O 1  
 C -4.43875499 -0.83217363 -1.66448014  
 C -3.33343167 0.07560466 -1.18758779  
 O -2.88051971 0.98012017 -1.88840468  
 H -5.22152123 -0.93426015 -0.91435698  
 N -2.85985771 -0.15429476 0.05109633  
 C -1.75542244 0.62809606 0.57219139  
 C -0.44749798 0.25420325 -0.12606575  
 O -0.32097492 -0.80516797 -0.73171524  
 C -1.69788371 0.20756982 2.05043850  
 C -2.15293936 -1.25370084 2.00280683  
 C -3.25521638 -1.25054446 0.94328782  
 H -3.31272164 -2.19237883 0.40145083  
 H -1.95941125 1.68760812 0.44481611  
 H -2.40154343 0.81165094 2.62215600  
 H -2.50928681 -1.61753257 2.96274195  
 H -4.23122245 -1.04253744 1.38599799  
 H -0.70410850 0.33033051 2.47543654  
 H -1.32941760 -1.88623270 1.67456169  
 N 0.57800058 1.11151975 0.01847116  
 C 1.90240048 0.71811677 -0.44648895  
 C 2.35027039 -0.56312365 0.26536971  
 O 1.96267429 -0.78728882 1.40739405  
 C 2.80224462 1.90392754 -0.04560877  
 C 1.82602515 3.07151141 0.11236170  
 C 0.59060549 2.40323343 0.70761444  
 H 0.70112255 2.26273242 1.78589806  
 H 1.86725830 0.57400348 -1.52398546  
 H 3.58193787 2.08977560 -0.77973865  
 H 1.57808328 3.49332087 -0.86138629  
 H -0.32025540 2.96231663 0.51480942  
 H 3.27570855 1.68905804 0.91286551  
 H 2.21490300 3.86307028 0.74729522  
 N 3.21363961 -1.36007465 -0.39307912  
 C 3.63372238 -2.62173224 0.19540354  
 H 4.71471657 -2.62941399 0.33554546  
 H 3.36188421 -3.44347404 -0.46812072  
 H 3.14259658 -2.75096310 1.15240531  
 C 3.69470927 -1.10123750 -1.74401632  
 H 3.00126186 -1.48077590 -2.49632155  
 H 4.64849080 -1.60949678 -1.86472595  
 H 3.86607874 -0.04213284 -1.90954567  
 H -4.03581094 -1.82654507 -1.86098893  
 H -4.85364511 -0.42798665 -2.58177866

1 2 1.0 4 1.0 42 1.0 43 1.0  
 2 3 2.0 5 1.5  
 3  
 4  
 5 6 1.0 11 1.0  
 6 7 1.0 9 1.0 13 1.0  
 7 8 2.0 19 1.5  
 8  
 9 10 1.0 14 1.0 17 1.0  
 10 11 1.0 15 1.0 18 1.0  
 11 12 1.0 16 1.0  
 12  
 13  
 14  
 15  
 16  
 17  
 18  
 19 20 1.0 25 1.0  
 20 21 1.0 23 1.0 27 1.0  
 21 22 2.0 33 1.5

22  
 23 24 1.0 28 1.0 31 1.0  
 24 25 1.0 29 1.0 32 1.0  
 25 26 1.0 30 1.0  
 26  
 27  
 28  
 29  
 30  
 31  
 32  
 33 34 1.0 38 1.0  
 34 35 1.0 36 1.0 37 1.0  
 35  
 36  
 37  
 38 39 1.0 40 1.0 41 1.0  
 39  
 40  
 41  
 42  
 43

**Ac-Pro2-NMe2-trans-nx-P2HFHF**

M062X/6311pp2d2p/H2O optimized

O 1  
 C -4.57314092 -0.86192289 -1.63814128  
 C -3.49759547 0.10362232 -1.21053951  
 O -3.11356817 1.02204860 -1.93343546  
 H -5.32751434 -0.98364175 -0.86222434  
 N -2.96949999 -0.09025715 0.01313197  
 C -1.88143580 0.74427514 0.48219919  
 C -0.59248507 0.41672141 -0.26976841  
 O -0.44600048 -0.63046335 -0.89249083  
 C -1.75063827 0.34605488 1.96195996  
 C -2.12752851 -1.13795584 1.94083894  
 C -3.26879416 -1.20201495 0.92384890  
 H -3.29357716 -2.14835363 0.38756930  
 H -2.12952509 1.79429519 0.34988776  
 H -2.47257163 0.91712453 2.54502383  
 H -2.42741352 -1.51190740 2.91600649  
 H -4.23751128 -1.04564595 1.40197958  
 H -0.75426869 0.53477467 2.35669591  
 H -1.28354317 -1.72859177 1.58641671  
 N 0.41453885 1.30172986 -0.14880635  
 C 1.70273343 0.99321004 -0.75889148  
 C 2.18026821 -0.38133610 -0.33103059  
 O 2.07045825 -0.70577303 0.88463633  
 C 2.62205847 2.10303146 -0.22556643  
 C 1.66200845 3.28183828 -0.05560480  
 C 0.38512352 2.63162605 0.47809280  
 H 0.40898858 2.53432911 1.56304441  
 H 1.61396300 1.04704151 -1.84097324  
 H 3.44466795 2.30463483 -0.90600326  
 H 1.46500035 3.74359065 -1.02269806  
 H -0.50594613 3.17905508 0.18215751  
 H 3.02777560 1.80791447 0.74204907  
 H 2.04685467 4.04122346 0.61934805  
 N 2.76049186 -1.17766233 -1.20441024  
 C 3.31319214 -2.45931603 -0.76728549  
 H 4.17762112 -2.68887988 -1.38258638  
 H 2.56970746 -3.24834153 -0.87536505  
 H 3.61823517 -2.39059652 0.27090326  
 C 2.75417771 -0.90676769 -2.64593522  
 H 1.73319476 -0.81206040 -3.00884600

|   |             |             |             |
|---|-------------|-------------|-------------|
| H | 3.22369911  | -1.74828522 | -3.14288525 |
| H | 3.31945600  | -0.00767068 | -2.87904811 |
| F | 1.33316527  | -2.96707323 | 1.65770576  |
| H | 1.63490995  | -2.11244685 | 1.34620458  |
| F | 1.60638290  | 0.83910921  | 2.74788015  |
| H | 1.76368856  | 0.26022005  | 1.98636596  |
| H | -4.13208664 | -1.84116870 | -1.82827438 |
| H | -5.03323259 | -0.49450398 | -2.54916878 |

1 2 1.0 4 1.0 46 1.0 47 1.0

2 3 2.0 5 1.5

3

4

5 6 1.0 11 1.0

6 7 1.0 9 1.0 13 1.0

7 8 2.0 19 1.5

8

9 10 1.0 14 1.0 17 1.0

10 11 1.0 15 1.0 18 1.0

11 12 1.0 16 1.0

12

13

14

15

16

17

18

19 20 1.0 25 1.0

20 21 1.0 23 1.0 27 1.0

21 22 2.0 33 2.0

22

23 24 1.0 28 1.0 31 1.0

24 25 1.0 29 1.0 32 1.0

25 26 1.0 30 1.0

26

27

28

29

30

31

32

33 34 1.0 38 1.0

34 35 1.0 36 1.0 37 1.0

35

36

37

38 39 1.0 40 1.0 41 1.0

39

40

41

42 43 0.0

43

44 45 0.0

45

46

47

#### Ac-Pro2-NMe2-trans-xn-4HF

M062X/6311pp2d2p/H2O optimized

0 1

|   |             |            |             |
|---|-------------|------------|-------------|
| C | -4.57551977 | 0.76927077 | -0.83726326 |
|---|-------------|------------|-------------|

|   |             |            |             |
|---|-------------|------------|-------------|
| C | -3.31932356 | 0.51131221 | -0.06058798 |
|---|-------------|------------|-------------|

|   |             |            |            |
|---|-------------|------------|------------|
| O | -2.73242484 | 1.40551522 | 0.58482502 |
|---|-------------|------------|------------|

|   |             |            |             |
|---|-------------|------------|-------------|
| H | -5.41519398 | 0.26581829 | -0.35774189 |
|---|-------------|------------|-------------|

|   |             |             |             |
|---|-------------|-------------|-------------|
| N | -2.82065100 | -0.72083520 | -0.06924312 |
|---|-------------|-------------|-------------|

|   |             |             |             |
|---|-------------|-------------|-------------|
| C | -1.58909000 | -1.03625029 | 0.64854089  |
| C | -0.45602233 | -0.13020916 | 0.19975554  |
| O | -0.35705225 | 0.25845386  | -0.97541711 |
| C | -1.31964712 | -2.50341783 | 0.26697812  |
| C | -2.71697496 | -3.05127392 | -0.02814457 |
| C | -3.40077794 | -1.89015578 | -0.74293002 |
| H | -3.14823115 | -1.86097056 | -1.80387154 |
| H | -1.75682338 | -0.91899711 | 1.71830164  |
| H | -0.79097596 | -3.03233993 | 1.05347081  |
| H | -3.23965192 | -3.27175472 | 0.90222201  |
| H | -4.48126211 | -1.89717282 | -0.63102223 |
| H | -0.70788680 | -2.53168224 | -0.63582114 |
| H | -2.69431143 | -3.95122178 | -0.63619542 |
| N | 0.47129529  | 0.20004029  | 1.09242830  |
| C | 1.52695163  | 1.13324175  | 0.71742659  |
| C | 2.48138639  | 0.51014479  | -0.29228005 |
| O | 2.61170780  | -0.73928644 | -0.34751986 |
| C | 2.22921277  | 1.43629226  | 2.05694560  |
| C | 1.95628002  | 0.18320054  | 2.89266453  |
| C | 0.52742952  | -0.18919422 | 2.51263475  |
| H | 0.33006956  | -1.25095919 | 2.62370665  |
| H | 1.07283524  | 2.01449528  | 0.27205744  |
| H | 1.75976723  | 2.30845469  | 2.50898842  |
| H | 2.06382667  | 0.35965751  | 3.95886056  |
| H | -0.20180687 | 0.38932067  | 3.08144379  |
| H | 3.28935326  | 1.64230917  | 1.93013977  |
| H | 2.63085370  | -0.62136495 | 2.60142831  |
| N | 3.17526053  | 1.30889995  | -1.07837220 |
| C | 4.03928312  | 0.73343541  | -2.10869781 |
| H | 4.98925979  | 0.41649727  | -1.68073389 |
| H | 4.21622221  | 1.49335614  | -2.86305731 |
| H | 3.54879181  | -0.11915499 | -2.56900727 |
| C | 3.14919928  | 2.76893414  | -0.98597923 |
| H | 2.44408647  | 3.18361564  | -1.70502777 |
| H | 4.14687015  | 3.13491655  | -1.21141549 |
| H | 2.89325944  | 3.09727818  | 0.01465735  |
| F | 4.42428744  | -2.24812759 | -1.23442056 |
| H | 3.76332572  | -1.62976601 | -0.93262344 |
| F | 1.69767152  | -2.55718536 | 1.08453417  |
| H | 1.98929942  | -1.81083884 | 0.55440123  |
| H | -4.47149703 | 0.37929438  | -1.84808661 |
| H | -4.76804110 | 1.83672410  | -0.86683673 |
| F | -2.02031461 | 0.16830177  | -2.77415329 |
| H | -1.38682385 | 0.16415945  | -2.03459823 |
| F | -3.65101865 | 3.64719691  | 0.57304124  |
| H | -3.28444811 | 2.73247384  | 0.57217319  |

1 2 1.0 4 1.0 46 1.0 47 1.0  
2 3 2.0 5 2.0  
3  
4  
5 6 1.0 11 1.0  
6 7 1.0 9 1.0 13 1.0  
7 8 2.0 19 1.5  
8  
9 10 1.0 14 1.0 17 1.0  
10 11 1.0 15 1.0 18 1.0  
11 12 1.0 16 1.0  
12  
13  
14  
15  
16  
17  
18  
19 20 1.0 25 1.0  
20 21 1.0 23 1.0 27 1.0

21 22 2.0 33 1.5  
 22  
 23 24 1.0 28 1.0 31 1.0  
 24 25 1.0 29 1.0 32 1.0  
 25 26 1.0 30 1.0  
 26  
 27  
 28  
 29  
 30  
 31  
 32  
 33 34 1.0 38 1.0  
 34 35 1.0 36 1.0 37 1.0  
 35  
 36  
 37  
 38 39 1.0 40 1.0 41 1.0  
 39  
 40  
 41  
 42 43 1.0  
 43  
 44 45 1.0  
 45  
 46  
 47  
 48 49 1.0  
 49  
 50 51 1.0  
 51

**Ac-Pro2-NMe2-trans-xn-5HF**

M062X/6311pp2d2p/H2O optimized

0 1  
 C -4.58734346 0.88133635 -0.81733063  
 C -3.33108910 0.63383391 -0.03870841  
 O -2.69180187 1.54868002 0.52033959  
 H -5.43789796 0.45014989 -0.28917350  
 N -2.88471153 -0.61702015 0.04986913  
 C -1.67767170 -0.92150734 0.80968061  
 C -0.49500989 -0.11933193 0.30516068  
 O -0.39321086 0.13794054 -0.91768981  
 C -1.47063435 -2.42755787 0.56402330  
 C -2.89315891 -2.93546112 0.32270703  
 C -3.52720622 -1.81878562 -0.50097411  
 H -3.28577006 -1.90867642 -1.56088106  
 H -1.85115846 -0.70375074 1.86176035  
 H -0.96229016 -2.90372207 1.39614378  
 H -3.41966129 -3.04078713 1.27076509  
 H -4.60559965 -1.76173706 -0.38326152  
 H -0.86596303 -2.56447950 -0.33398909  
 H -2.91352169 -3.88960384 -0.19587815  
 N 0.43620671 0.23437010 1.17078404  
 C 1.59120032 1.03403972 0.76446776  
 C 2.58507271 0.19572171 -0.04056489  
 O 2.42454045 -1.04966386 -0.12666531  
 C 2.17872806 1.50903429 2.10593728  
 C 1.81316015 0.37223640 3.06094517  
 C 0.40061221 -0.00347766 2.63133200  
 H 0.16194943 -1.04139651 2.83999764  
 H 1.24711618 1.85798523 0.14379817  
 H 1.68172900 2.43240273 2.39887262  
 H 1.85483449 0.66867555 4.10466153  
 H -0.34270010 0.65475646 3.08158313

|   |             |             |             |
|---|-------------|-------------|-------------|
| H | 3.24780523  | 1.69257131  | 2.04523533  |
| H | 2.47850051  | -0.47847150 | 2.91173363  |
| N | 3.60849155  | 0.79606117  | -0.60980732 |
| C | 4.57150082  | 0.00744238  | -1.37571788 |
| H | 4.72250356  | -0.95652118 | -0.90131784 |
| H | 5.51028745  | 0.55240216  | -1.40105161 |
| H | 4.20763610  | -0.13866511 | -2.39257971 |
| C | 3.77684577  | 2.24188148  | -0.71231783 |
| H | 3.72711662  | 2.52286207  | -1.76316229 |
| H | 4.75019948  | 2.51344118  | -0.30884721 |
| H | 3.00980669  | 2.77821663  | -0.16974034 |
| F | 2.73282982  | -2.45372089 | -2.20072125 |
| H | 2.64787329  | -1.90891492 | -1.42346701 |
| F | 1.53143268  | -2.59040441 | 1.61861284  |
| H | 1.83881851  | -1.97177996 | 0.95273862  |
| H | -4.51491431 | 0.40893258  | -1.79528864 |
| H | -4.73846316 | 1.95003183  | -0.92924771 |
| F | -2.12056196 | 0.00559718  | -2.74676773 |
| H | -1.50785803 | 0.00489713  | -2.01364641 |
| F | -3.48807216 | 3.83331316  | 0.31379051  |
| H | -3.17214658 | 2.90608079  | 0.39358644  |
| F | 1.28096758  | 1.32895257  | -2.35240013 |
| H | 0.65623707  | 0.87550230  | -1.78760956 |

1 2 1.0 4 1.0 46 1.0 47 1.0  
2 3 2.0 5 1.5  
3  
4  
5 6 1.0 11 1.0  
6 7 1.0 9 1.0 13 1.0  
7 8 2.0 19 1.5  
8  
9 10 1.0 14 1.0 17 1.0  
10 11 1.0 15 1.0 18 1.0  
11 12 1.0 16 1.0  
12  
13  
14  
15  
16  
17  
18  
19 20 1.0 25 1.0  
20 21 1.0 23 1.0 27 1.0  
21 22 2.0 33 2.0  
22  
23 24 1.0 28 1.0 31 1.0  
24 25 1.0 29 1.0 32 1.0  
25 26 1.0 30 1.0  
26  
27  
28  
29  
30  
31  
32  
33 34 1.0 38 1.0  
34 35 1.0 36 1.0 37 1.0  
35  
36  
37  
38 39 1.0 40 1.0 41 1.0  
39  
40  
41  
42 43 1.0  
43



44 45 1.0  
45  
46  
47  
48 49 1.0  
49  
50 51 1.0  
51  
52 53 1.0  
53

**Ac-Pro2-NMe2-trans-xn-6HF**

M062X/6311pp2d2p/H2O optimized

O 1  
C 4.54256023 -0.44816155 -1.10235587  
C 3.31412362 -0.40867959 -0.24672448  
O 2.76922470 -1.47243395 0.14533185  
H 5.40910320 -0.15755903 -0.50751957  
N 2.81869063 0.77279705 0.08352766  
C 1.62267959 0.92754836 0.91122246  
C 0.42477918 0.21707309 0.31222996  
O 0.34980254 0.04165331 -0.92671652  
C 1.39902663 2.45305340 0.93505886  
C 2.81010733 3.01153148 0.76272112  
C 3.43148240 2.07003277 -0.26069377  
H 3.15556562 2.33601176 -1.28139726  
H 1.82310697 0.53632629 1.90834316  
H 0.90235661 2.77358229 1.84485302  
H 3.35661921 2.95100065 1.70313028  
H 4.51245582 2.00788165 -0.18322152  
H 0.77444352 2.73653080 0.08655923  
H 2.81178459 4.04278881 0.42222492  
N -0.53211484 -0.16633171 1.13288094  
C -1.65352722 -0.97847487 0.66254156  
C -2.65490782 -0.13255845 -0.12185936  
O -2.52744416 1.11977017 -0.14864391  
C -2.24979558 -1.54291902 1.96496174  
C -1.91993929 -0.45971889 2.99204843  
C -0.50682885 -0.04421517 2.60620718  
H -0.27079637 0.97473597 2.89536145  
H -1.26194954 -1.75990931 0.01447396  
H -1.73315081 -2.46978021 2.20732588  
H -1.97209651 -0.81943466 4.01511186  
H 0.23077344 -0.74036980 3.00573161  
H -3.31403946 -1.74301531 1.87738588  
H -2.59523994 0.38921839 2.88329310  
N -3.65003605 -0.73440315 -0.73807214  
C -4.62208365 0.05798463 -1.48792149  
H -4.79057477 1.00692248 -0.99014215  
H -5.55202684 -0.50110162 -1.53152415  
H -4.25617757 0.23541233 -2.49907703  
C -3.77549487 -2.17856184 -0.90448811  
H -3.69638398 -2.41401288 -1.96479061  
H -4.74895322 -2.49360737 -0.53416385  
H -3.00504885 -2.71598674 -0.36765957  
F -2.81604502 2.57423240 -2.18801411  
H -2.73767252 2.01170876 -1.42224691  
F -1.64721049 2.57326054 1.67622383  
H -1.94941344 1.98782661 0.97771779  
H 4.44298805 0.24730243 -1.93248605  
H 4.69022471 -1.45580478 -1.47619241  
F 1.97820620 0.68377920 -2.74105493  
H 1.39313867 0.47613802 -2.01529894  
F 3.79970494 -3.63360334 -0.51730772  
H 3.40960576 -2.78820050 -0.26819345

|   |             |             |             |
|---|-------------|-------------|-------------|
| F | -1.27518530 | -1.11093469 | -2.46541222 |
| H | -0.67289044 | -0.67615237 | -1.86670469 |
| F | 0.84277477  | -2.61271344 | 1.34875028  |
| H | 1.54250918  | -2.12459641 | 0.93462395  |

1 2 1.0 4 1.0 46 1.0 47 1.0  
2 3 2.0 5 1.5  
3  
4  
5 6 1.0 11 1.0  
6 7 1.0 9 1.0 13 1.0  
7 8 2.0 19 2.0  
8  
9 10 1.0 14 1.0 17 1.0  
10 11 1.0 15 1.0 18 1.0  
11 12 1.0 16 1.0  
12  
13  
14  
15  
16  
17  
18  
19 20 1.0 25 1.0  
20 21 1.0 23 1.0 27 1.0  
21 22 2.0 33 2.0  
22  
23 24 1.0 28 1.0 31 1.0  
24 25 1.0 29 1.0 32 1.0  
25 26 1.0 30 1.0  
26  
27  
28  
29  
30  
31  
32  
33 34 1.0 38 1.0  
34 35 1.0 36 1.0 37 1.0  
35  
36  
37  
38 39 1.0 40 1.0 41 1.0  
39  
40  
41  
42 43 1.0  
43  
44 45 1.0  
45  
46  
47  
48 49 1.0  
49  
50 51 1.0  
51  
52 53 1.0  
53  
54 55 1.0  
55

**Ac-Pro2-NMe2-trans-xn-HF212**

M062X/6311pp2d2p/H2O optimized

0 1

|   |             |             |             |
|---|-------------|-------------|-------------|
| C | 4.54388580  | -0.15610953 | -1.18319035 |
| C | 3.31478308  | -0.25779242 | -0.33377523 |
| O | 2.86115451  | -1.38337281 | 0.00266473  |
| H | 5.38053673  | 0.18564369  | -0.57298151 |
| N | 2.72652068  | 0.85881806  | 0.05776597  |
| C | 1.52003344  | 0.87173507  | 0.88414278  |
| C | 0.36796993  | 0.14905759  | 0.20785013  |
| O | 0.30620934  | 0.01038799  | -1.02365385 |
| C | 1.20320224  | 2.37367902  | 1.03980762  |
| C | 2.56590838  | 3.04311671  | 0.86965676  |
| C | 3.21803177  | 2.21742681  | -0.23136911 |
| H | 2.87663872  | 2.51728557  | -1.22309325 |
| H | 1.73764119  | 0.40387338  | 1.84467873  |
| H | 0.71915263  | 2.58641114  | 1.98741167  |
| H | 3.14621771  | 2.95922030  | 1.78791453  |
| H | 4.30259059  | 2.24254623  | -0.20031049 |
| H | 0.52894898  | 2.68236163  | 0.24024387  |
| H | 2.48508415  | 4.09237747  | 0.60093704  |
| N | -0.60480594 | -0.30081274 | 0.99132624  |
| C | -1.64515412 | -1.14979492 | 0.42463663  |
| C | -2.64832080 | -0.33060624 | -0.37942304 |
| O | -2.66821973 | 0.92185325  | -0.26977467 |
| C | -2.27962240 | -1.81017584 | 1.66315408  |
| C | -2.03514681 | -0.78202338 | 2.76992141  |
| C | -0.62944120 | -0.27970032 | 2.46429405  |
| H | -0.45115435 | 0.72537416  | 2.83390227  |
| H | -1.17178926 | -1.87224470 | -0.23588899 |
| H | -1.74036782 | -2.73212632 | 1.87478382  |
| H | -2.10905694 | -1.21011366 | 3.76524671  |
| H | 0.12529675  | -0.96707261 | 2.84839581  |
| H | -3.33110739 | -2.04354445 | 1.51619019  |
| H | -2.74568036 | 0.04085943  | 2.68956239  |
| N | -3.50860982 | -0.95596082 | -1.15889127 |
| C | -4.50125973 | -0.16689218 | -1.88949773 |
| H | -4.99076248 | 0.53071020  | -1.21470072 |
| H | -5.23752018 | -0.84798361 | -2.30277937 |
| H | -4.02631354 | 0.38729418  | -2.69713719 |
| C | -3.56608412 | -2.40125361 | -1.36026481 |
| H | -3.44873741 | -2.61678507 | -2.42052024 |
| H | -4.53531755 | -2.76690600 | -1.02568612 |
| H | -2.79047246 | -2.91498533 | -0.80777372 |
| F | -3.52415425 | 2.80889635  | -1.70034970 |
| H | -3.23431566 | 2.05401606  | -1.19404510 |
| F | -1.86083712 | 2.34556691  | 1.61187245  |
| H | -2.11377390 | 1.75143210  | 0.90104750  |
| H | 4.38490923  | 0.55769572  | -1.98795633 |
| H | 4.77964526  | -1.13233097 | -1.59374536 |
| F | 1.89846108  | 0.69562734  | -2.76309371 |
| H | 1.29069008  | 0.45002314  | -2.04526497 |
| F | 4.06424403  | -3.41414969 | -0.75148099 |
| H | 3.60443230  | -2.61483500 | -0.46495279 |
| F | 0.98291694  | -2.64375728 | 1.13383020  |
| H | 1.66130860  | -2.10710872 | 0.73856194  |

1 2 1.0 4 1.0 46 1.0 47 1.0

2 3 2.0 5 2.0

3

4

5 6 1.0 11 1.0

6 7 1.0 9 1.0 13 1.0

7 8 2.0 19 1.5

8

9 10 1.0 14 1.0 17 1.0

10 11 1.0 15 1.0 18 1.0

11 12 1.0 16 1.0

12

13

14  
15  
16  
17  
18  
19 20 1.0 25 1.0  
20 21 1.0 23 1.0 27 1.0  
21 22 2.0 33 1.5  
22  
23 24 1.0 28 1.0 31 1.0  
24 25 1.0 29 1.0 32 1.0  
25 26 1.0 30 1.0  
26  
27  
28  
29  
30  
31  
32  
33 34 1.0 38 1.0  
34 35 1.0 36 1.0 37 1.0  
35  
36  
37  
38 39 1.0 40 1.0 41 1.0  
39  
40  
41  
42 43 1.0  
43  
44 45 1.0  
45  
46  
47  
48 49 1.0  
49  
50 51 1.0  
51  
52 53 1.0  
53

**Ac-Pro2-NMe2-trans-xn-HF221**

M062X/6311pp2d2p/H2O optimized

0 1  
C 4.42593113 -0.99835233 -0.62616982  
C 3.15800413 -0.57079053 0.04580719  
O 2.50950357 -1.37327190 0.76552619  
H 5.27453074 -0.50547074 -0.15149915  
N 2.73772071 0.67040342 -0.13717222  
C 1.51902467 1.19059697 0.48238859  
C 0.29596919 0.38349901 0.08859143  
O 0.27682467 -0.23542905 -1.00217627  
C 1.42569796 2.63071551 -0.06116831  
C 2.88314250 2.99524495 -0.33584789  
C 3.46177399 1.70422190 -0.89992461  
H 3.24116433 1.58571360 -1.96122359  
H 1.63695641 1.17710605 1.56532607  
H 0.92593886 3.29250498 0.63789586  
H 3.39072358 3.25317931 0.59290866  
H 4.53148422 1.61075724 -0.74140615  
H 0.85446577 2.62715739 -0.98991472  
H 2.98141217 3.82415257 -1.03065873  
N -0.73087915 0.38901375 0.91266419  
C -1.89118647 -0.47869140 0.70159989  
C -2.81725608 0.07840176 -0.38044448

|   |             |             |             |
|---|-------------|-------------|-------------|
| O | -2.67451884 | 1.23611636  | -0.81049036 |
| C | -2.57016728 | -0.48750659 | 2.08443829  |
| C | -2.21800122 | 0.88850037  | 2.64779357  |
| C | -0.76577048 | 1.06513640  | 2.22738505  |
| H | -0.47820774 | 2.10638338  | 2.12355086  |
| H | -1.53489502 | -1.46367951 | 0.40667342  |
| H | -2.12108145 | -1.27407957 | 2.68826858  |
| H | -2.33868157 | 0.94710356  | 3.72535611  |
| H | -0.09343838 | 0.54515281  | 2.91038367  |
| H | -3.64065804 | -0.65863607 | 2.01545384  |
| H | -2.83189299 | 1.66049544  | 2.18299266  |
| N | -3.79407593 | -0.71100741 | -0.81668583 |
| C | -4.63062193 | -0.25588443 | -1.92082151 |
| H | -4.70235006 | 0.82491417  | -1.90524286 |
| H | -5.61945603 | -0.69294140 | -1.81072543 |
| H | -4.19802992 | -0.57897116 | -2.86928833 |
| C | -3.89192419 | -2.13322879 | -0.50730046 |
| H | -3.37168397 | -2.71583537 | -1.26769807 |
| H | -4.94380339 | -2.40732934 | -0.49823833 |
| H | -3.47914402 | -2.36103648 | 0.46846804  |
| F | -1.59243955 | 3.15879957  | 0.23258088  |
| H | -1.98609984 | 2.35861033  | -0.16389577 |
| H | 4.40359981  | -0.71550480 | -1.67650201 |
| H | 4.54031493  | -2.07312034 | -0.53266421 |
| F | 2.06165568  | -0.49032080 | -2.76411919 |
| H | 1.41979885  | -0.34832321 | -2.07092813 |
| F | 3.38035283  | -3.68349347 | 1.03314353  |
| H | 3.05328091  | -2.78348118 | 0.92058870  |
| F | -1.39710169 | -1.56366435 | -2.31629557 |
| H | -0.79386437 | -1.05037626 | -1.78342329 |
| F | 0.43630438  | -1.87712703 | 2.14468227  |
| H | 1.18914108  | -1.61155908 | 1.63303392  |

1 2 1.0 4 1.0 44 1.0 45 1.0  
2 3 2.0 5 1.5  
3  
4  
5 6 1.0 11 1.0  
6 7 1.0 9 1.0 13 1.0  
7 8 2.0 19 2.0  
8  
9 10 1.0 14 1.0 17 1.0  
10 11 1.0 15 1.0 18 1.0  
11 12 1.0 16 1.0  
12  
13  
14  
15  
16  
17  
18  
19 20 1.0 25 1.0  
20 21 1.0 23 1.0 27 1.0  
21 22 2.0 33 1.5  
22  
23 24 1.0 28 1.0 31 1.0  
24 25 1.0 29 1.0 32 1.0  
25 26 1.0 30 1.0  
26  
27  
28  
29  
30  
31  
32  
33 34 1.0 38 1.0  
34 35 1.0 36 1.0 37 1.0

35  
36  
37  
38 39 1.0 40 1.0 41 1.0  
39  
40  
41  
42 43 1.0  
43  
44  
45  
46 47 1.0  
47  
48 49 1.0  
49  
50 51 1.0  
51  
52 53 1.0  
53

**Ac-Pro2-NMe2-trans-xn-HF3**

M062X/6311pp2d2p/H2O optimized

0 1  
C 4.59993921 -1.78447370 0.14819617  
C 3.36871372 -1.05539671 0.61571601  
O 2.65645671 -1.46867001 1.53017079  
H 5.49327308 -1.20722071 0.38756232  
N 3.06631751 0.09121026 -0.02467411  
C 1.88308937 0.84708611 0.35512602  
C 0.63968090 -0.01955784 0.27270646  
O 0.50107128 -0.88629634 -0.60620945  
C 1.84110115 1.99147499 -0.67437427  
C 3.31161742 2.16500244 -1.06034030  
C 3.83104410 0.73059173 -1.09883498  
H 3.61162224 0.24678096 -2.05244603  
H 1.99824452 1.22397556 1.37112942  
H 1.37966583 2.88479722 -0.26588797  
H 3.83739449 2.72597574 -0.28771384  
H 4.89828022 0.66334983 -0.90431860  
H 1.26040194 1.67350960 -1.54149453  
H 3.43841507 2.67739673 -2.01014116  
N -0.34302300 0.20735218 1.14046383  
C -1.50994095 -0.66604182 1.14839711  
C -2.35228988 -0.46918487 -0.10451945  
O -2.34675857 0.64196021 -0.69471920  
C -2.27037718 -0.23629965 2.41945088  
C -1.83840101 1.21938610 2.61819436  
C -0.36634274 1.20698052 2.22151797  
H -0.02481258 2.17015436 1.85482877  
H -1.17355094 -1.69832243 1.18792090  
H -1.93493321 -0.85260875 3.25189882  
H -1.98547837 1.56372978 3.63769507  
H 0.26710049 0.87467476 3.04530872  
H -3.34683713 -0.35227112 2.31710553  
H -2.39117182 1.87404219 1.94479773  
N -3.09488230 -1.47100741 -0.53146368  
C -3.84135290 -1.34224796 -1.78217072  
H -4.80846187 -0.87310111 -1.60700978  
H -3.98985466 -2.33796825 -2.18885670  
H -3.27344460 -0.74768210 -2.49069893  
C -3.23359905 -2.74284652 0.17901029  
H -2.53388149 -3.47803711 -0.21641164  
H -4.24884874 -3.09913318 0.02868947  
H -3.07853987 -2.61960538 1.24472816  
F -4.07466003 1.76340545 -2.13712538

|   |             |             |             |
|---|-------------|-------------|-------------|
| H | -3.44206694 | 1.28741475  | -1.60242165 |
| F | -1.15028150 | 2.77353969  | -0.22636311 |
| H | -1.55827771 | 1.91347629  | -0.35718706 |
| H | 4.56449421  | -1.92607662 | -0.93105622 |
| H | 4.64940596  | -2.74560758 | 0.64870469  |
| F | 2.17765861  | -1.82511596 | -2.12862216 |
| H | 1.55507431  | -1.40377920 | -1.50840232 |

1 2 1.0 4 1.0 46 1.0 47 1.0  
 2 3 2.0 5 2.0  
 3  
 4  
 5 6 1.0 11 1.0  
 6 7 1.0 9 1.0 13 1.0  
 7 8 2.0 19 1.5  
 8  
 9 10 1.0 14 1.0 17 1.0  
 10 11 1.0 15 1.0 18 1.0  
 11 12 1.0 16 1.0  
 12  
 13  
 14  
 15  
 16  
 17  
 18  
 19 20 1.0 25 1.0  
 20 21 1.0 23 1.0 27 1.0  
 21 22 2.0 33 1.5  
 22  
 23 24 1.0 28 1.0 31 1.0  
 24 25 1.0 29 1.0 32 1.0  
 25 26 1.0 30 1.0  
 26  
 27  
 28  
 29  
 30  
 31  
 32  
 33 34 1.0 38 1.0  
 34 35 1.0 36 1.0 37 1.0  
 35  
 36  
 37  
 38 39 1.0 40 1.0 41 1.0  
 39  
 40  
 41  
 42 43 1.0  
 43  
 44 45 1.0  
 45  
 46  
 47  
 48 49 1.0  
 49

#### Ac-Pro2-NMe2-trans-xn

M062X/6311pp2d2p/H2O optimized

|     |            |             |            |
|-----|------------|-------------|------------|
| 0 1 |            |             |            |
| C   | 4.37236866 | -0.37511934 | 2.04313727 |
| C   | 3.17464053 | 0.21700569  | 1.34357988 |
| O   | 2.46245836 | 1.07033622  | 1.87209708 |
| H   | 5.29092953 | -0.01456490 | 1.57908572 |

|   |             |             |             |
|---|-------------|-------------|-------------|
| N | 2.91848750  | -0.22489884 | 0.09896038  |
| C | 1.78039662  | 0.29846514  | -0.64242656 |
| C | 0.47011385  | 0.01371416  | 0.08341130  |
| O | 0.31542674  | -1.01430957 | 0.73442733  |
| C | 1.83701606  | -0.46770139 | -1.97685163 |
| C | 3.31579506  | -0.83691779 | -2.11392018 |
| C | 3.71452403  | -1.17528841 | -0.68020247 |
| H | 3.44167267  | -2.20233384 | -0.42566405 |
| H | 1.90809905  | 1.37110396  | -0.78775935 |
| H | 1.45851300  | 0.12483024  | -2.80569142 |
| H | 3.88818634  | 0.02451701  | -2.45805555 |
| H | 4.77606330  | -1.03763959 | -0.49244438 |
| H | 1.23540722  | -1.37378866 | -1.89417351 |
| H | 3.48397232  | -1.66354534 | -2.79898818 |
| N | -0.51469733 | 0.91150934  | -0.07795997 |
| C | -1.81846551 | 0.65557223  | 0.50752066  |
| C | -2.52418152 | -0.48230939 | -0.24497120 |
| O | -2.17727962 | -0.78050228 | -1.38289274 |
| C | -2.55193526 | 1.99264356  | 0.31089303  |
| C | -1.96182871 | 2.51369934  | -1.00196305 |
| C | -0.48652597 | 2.12321580  | -0.90949969 |
| H | -0.05515677 | 1.92017551  | -1.88748703 |
| H | -1.69489595 | 0.38916309  | 1.55374633  |
| H | -2.30292093 | 2.66009288  | 1.13540349  |
| H | -2.09403545 | 3.58452241  | -1.13039416 |
| H | 0.09980384  | 2.90186194  | -0.41836180 |
| H | -3.63259465 | 1.87547189  | 0.27362317  |
| H | -2.42476579 | 2.00181092  | -1.84434773 |
| N | -3.55112189 | -1.08118408 | 0.39331482  |
| C | -4.23754678 | -2.20485347 | -0.22296068 |
| H | -5.28696826 | -1.95954325 | -0.38849222 |
| H | -4.18255001 | -3.07240268 | 0.43564193  |
| H | -3.76532865 | -2.43702485 | -1.16985006 |
| C | -3.97347066 | -0.76338736 | 1.75030857  |
| H | -3.46058052 | -1.39037944 | 2.48200325  |
| H | -5.04316148 | -0.94863949 | 1.82551978  |
| H | -3.80343453 | 0.28062641  | 1.99043866  |
| H | 4.36978169  | -1.46208396 | 1.97745939  |
| H | 4.35503990  | -0.06684280 | 3.08319614  |

1 2 1.0 4 1.0 42 1.0 43 1.0  
2 3 2.0 5 2.0  
3  
4  
5 6 1.0 11 1.0  
6 7 1.0 9 1.0 13 1.0  
7 8 2.0 19 1.5  
8  
9 10 1.0 14 1.0 17 1.0  
10 11 1.0 15 1.0 18 1.0  
11 12 1.0 16 1.0  
12  
13  
14  
15  
16  
17  
18  
19 20 1.0 25 1.0  
20 21 1.0 23 1.0 27 1.0  
21 22 2.0 33 1.5  
22  
23 24 1.0 28 1.0 31 1.0  
24 25 1.0 29 1.0 32 1.0  
25 26 1.0 30 1.0  
26  
27



28  
29  
30  
31  
32  
33 34 1.0 38 1.0  
34 35 1.0 36 1.0 37 1.0  
35  
36  
37  
38 39 1.0 40 1.0 41 1.0  
39  
40  
41  
42  
43

**Ac-Pro2-NMe2-trans-xn-P2HFHF**

M062X/6311pp2d2p/H2O optimized

0 1  
C 4.69992630 -1.69735272 -1.16356862  
C 3.51483201 -1.29178211 -0.32410090  
O 2.88841235 -2.09889335 0.36247675  
H 5.61680480 -1.28810906 -0.73860187  
N 3.16778151 0.00806914 -0.35074758  
C 2.03428187 0.47412014 0.43465480  
C 0.75298392 -0.22694479 -0.00149109  
O 0.55961793 -0.54298428 -1.16914034  
C 1.97597973 1.98257089 0.12986564  
C 3.41411774 2.32191175 -0.26768098  
C 3.84915420 1.09271617 -1.06007686  
H 3.50465424 1.14732268 -2.09562538  
H 2.22569563 0.28233556 1.49011319  
H 1.60579002 2.55195970 0.97689106  
H 4.03683910 2.42092177 0.62158147  
H 4.92546088 0.94340538 -1.05515074  
H 1.30444565 2.15289964 -0.71259535  
H 3.48629167 3.23817841 -0.84770222  
N -0.18354238 -0.43054715 0.94550521  
C -1.38580027 -1.16914500 0.60042535  
C -2.28838317 -0.35868114 -0.32133041  
O -2.22324900 0.89734259 -0.31987581  
C -2.05220710 -1.43249475 1.96636738  
C -1.53884836 -0.28355693 2.83855033  
C -0.09498917 -0.11229466 2.37760161  
H 0.26822481 0.90123271 2.52251159  
H -1.10631855 -2.08586629 0.08726069  
H -1.69738925 -2.38870356 2.34811807  
H -1.61028504 -0.49982226 3.90077150  
H 0.56953333 -0.81770825 2.88058877  
H -3.13722765 -1.46909926 1.90113334  
H -2.09741832 0.62892837 2.63036718  
N -3.14817033 -0.99477070 -1.09406811  
C -3.96640408 -0.23020005 -2.03423687  
H -4.78757183 0.26392366 -1.51687692  
H -4.36575564 -0.91844864 -2.77206590  
H -3.35637782 0.51671486 -2.53434882  
C -3.36056777 -2.44118347 -1.07137046  
H -2.83807309 -2.91459403 -1.90156181  
H -4.42729698 -2.62554237 -1.16924360  
H -3.03156998 -2.87500540 -0.13487591  
F -3.69091931 2.75412345 -1.15562066  
H -3.17034334 2.00333208 -0.87382425  
F -0.96314772 2.49418793 1.11644041  
H -1.37841795 1.80753520 0.58767560

H 4.60679314 -1.31961942 -2.18071770  
H 4.76492836 -2.78005260 -1.17536463

1 2 1.0 4 1.0 46 1.0 47 1.0  
2 3 2.0 5 2.0  
3  
4  
5 6 1.0 11 1.0  
6 7 1.0 9 1.0 13 1.0  
7 8 2.0 19 1.5  
8  
9 10 1.0 14 1.0 17 1.0  
10 11 1.0 15 1.0 18 1.0  
11 12 1.0 16 1.0  
12  
13  
14  
15  
16  
17  
18  
19 20 1.0 25 1.0  
20 21 1.0 23 1.0 27 1.0  
21 22 2.0 33 1.5  
22  
23 24 1.0 28 1.0 31 1.0  
24 25 1.0 29 1.0 32 1.0  
25 26 1.0 30 1.0  
26  
27  
28  
29  
30  
31  
32  
33 34 1.0 38 1.0  
34 35 1.0 36 1.0 37 1.0  
35  
36  
37  
38 39 1.0 40 1.0 41 1.0  
39  
40  
41  
42 43 1.0  
43  
44 45 1.0  
45  
46  
47

**Ac-Pro2-NMe2-trans-xn**

M062X/6311pp2d2p/H2O optimized

0 1  
C 4.40223235 0.07640933 2.04448202  
C 3.20158638 0.50981550 1.24133913  
O 2.50616827 1.47155391 1.56766789  
H 5.31809710 0.29390040 1.49425471  
N 2.92315511 -0.20180231 0.13405425  
C 1.77718404 0.14981051 -0.69150756  
C 0.47522490 0.03573452 0.09407607  
O 0.32947594 -0.82141002 0.95965234  
C 1.81412441 -0.89305408 -1.82415473  
C 3.28671934 -1.30493898 -1.88536288  
C 3.69398010 -1.31902018 -0.41459998

|   |             |             |              |
|---|-------------|-------------|--------------|
| H | 3.40256498  | -2.25641789 | 0.06547654   |
| H | 1.90448625  | 1.16338148  | -1.07097536  |
| H | 1.43506921  | -0.49257643 | -2.76091400  |
| H | 3.86686274  | -0.55198623 | -2.41873325  |
| H | 4.75966947  | -1.16552071 | -0.26765121  |
| H | 1.20238755  | -1.75042063 | -1.54079395  |
| H | 3.43644161  | -2.26753641 | -2.36717337  |
| N | -0.51346248 | 0.87339303  | -0.25528123  |
| C | -1.81715673 | 0.74560684  | 0.37152998   |
| C | -2.52848595 | -0.51881591 | -0.13612316  |
| O | -2.17626713 | -1.04751913 | -1.18511011  |
| C | -2.54676011 | 2.01645592  | -0.09317583  |
| C | -1.96368971 | 2.25050381  | -1.48882685  |
| C | -0.48944898 | 1.87687568  | -1.32891891  |
| H | -0.07241565 | 1.46320327  | -2.24474951  |
| H | -1.69325219 | 0.69631004  | 1.44978019   |
| H | -2.29017743 | 2.83922698  | 0.57357360   |
| H | -2.09105413 | 3.27223552  | -1.83551036  |
| H | 0.10834884  | 2.73758526  | -1.02449089  |
| H | -3.62787992 | 1.89936482  | -0.10020048  |
| H | -2.43524003 | 1.57827279  | -2.20404893  |
| N | -3.56819871 | -0.96224682 | 0.60100467   |
| C | -4.26303807 | -2.18189126 | 0.22161095   |
| H | -5.32723266 | -1.97970769 | 0.10097733   |
| H | -4.13762207 | -2.93692214 | 0.99915651   |
| H | -3.85502227 | -2.55209436 | -0.711115000 |
| C | -3.97123857 | -0.38849259 | 1.87734126   |
| H | -3.44875731 | -0.86495876 | 2.70897952   |
| H | -5.03965659 | -0.55331485 | 2.00063492   |
| H | -3.79734939 | 0.68156771  | 1.90933665   |
| H | 4.37778894  | -0.99437388 | 2.24124759   |
| H | 4.41106842  | 0.62438170  | 2.98059192   |

1 2 1.0 4 1.0 42 1.0 43 1.0  
2 3 2.0 5 1.5  
3  
4  
5 6 1.0 11 1.0  
6 7 1.0 9 1.0 13 1.0  
7 8 2.0 19 1.5  
8  
9 10 1.0 14 1.0 17 1.0  
10 11 1.0 15 1.0 18 1.0  
11 12 1.0 16 1.0  
12  
13  
14  
15  
16  
17  
18  
19 20 1.0 25 1.0  
20 21 1.0 23 1.0 27 1.0  
21 22 2.0 33 1.5  
22  
23 24 1.0 28 1.0 31 1.0  
24 25 1.0 29 1.0 32 1.0  
25 26 1.0 30 1.0  
26  
27  
28  
29  
30  
31  
32  
33 34 1.0 38 1.0  
34 35 1.0 36 1.0 37 1.0

35  
36  
37  
38 39 1.0 40 1.0 41 1.0  
39  
40  
41  
42  
43

**Ac-Pro2-NMe2-trans-xx-4HF**

M062X/6311pp2d2p/H2O optimized

0 1  
C -4.38693196 0.40597327 -0.98877153  
C -3.15281024 0.49559369 -0.14248926  
O -2.64752540 1.58687995 0.19537928  
H -5.22369945 0.06138343 -0.38055326  
N -2.58463906 -0.63717427 0.25892423  
C -1.37146519 -0.61694978 1.06533906  
C -0.24963713 0.12804179 0.37233496  
O -0.14420275 0.15038299 -0.86606452  
C -0.99666707 -2.10691271 1.19088052  
C -2.34642303 -2.81543223 1.06411275  
C -3.06669706 -1.99961926 -0.00582058  
H -2.77221475 -2.30042282 -1.01227765  
H -1.58353807 -0.17307712 2.03618009  
H -0.46963197 -2.30995952 2.11809302  
H -2.89249664 -2.75431940 2.00497673  
H -4.14863086 -2.04570123 0.08082110  
H -0.34854662 -2.38478191 0.35721999  
H -2.24680089 -3.86056408 0.78543425  
N 0.70219968 0.65671288 1.13271266  
C 1.90451533 1.20734468 0.50585702  
C 2.49694518 0.20679436 -0.47060723  
O 2.52804110 -1.01093727 -0.14112899  
C 2.83811530 1.45707850 1.69978326  
C 1.86092429 1.78723345 2.82850561  
C 0.70410546 0.81526901 2.59963372  
H 0.88699236 -0.14840172 3.07165041  
H 1.64939947 2.13623379 0.00318773  
H 3.55091878 2.25030656 1.49317760  
H 1.50694266 2.81250453 2.72830456  
H -0.24580966 1.21987813 2.93750365  
H 3.38507164 0.54281809 1.93139933  
H 2.30277386 1.66650269 3.81337506  
N 3.01299313 0.63069007 -1.60415589  
C 3.65174764 -0.31528816 -2.51906852  
H 4.51278627 0.16935327 -2.96984702  
H 2.95101226 -0.61049732 -3.29940416  
H 3.97457606 -1.19229236 -1.97041674  
C 2.86497920 2.01261479 -2.07425906  
H 1.81486616 2.25021330 -2.23223288  
H 3.38734829 2.09777042 -3.02044356  
H 3.30680929 2.71447632 -1.37178882  
F 1.62182191 -2.72648516 -1.74683392  
H 1.98179442 -2.07573894 -1.14839835  
F 2.16700886 -1.88932679 2.14624933  
H 2.28352209 -1.51856860 1.26242546  
H -4.23341957 -0.30441256 -1.79852526  
H -4.61926425 1.38669734 -1.39116450  
F -1.72314658 -0.62250703 -2.57750222  
H -1.12467269 -0.34284740 -1.86301065  
F -3.69042083 3.63646607 -0.56381889  
H -3.27204258 2.79746889 -0.25897230

1 2 1.0 4 1.0 46 1.0 47 1.0  
 2 3 2.0 5 2.0  
 3  
 4  
 5 6 1.0 11 1.0  
 6 7 1.0 9 1.0 13 1.0  
 7 8 2.0 19 1.5  
 8  
 9 10 1.0 14 1.0 17 1.0  
 10 11 1.0 15 1.0 18 1.0  
 11 12 1.0 16 1.0  
 12  
 13  
 14  
 15  
 16  
 17  
 18  
 19 20 1.0 25 1.0  
 20 21 1.0 23 1.0 27 1.0  
 21 22 2.0 33 1.5  
 22  
 23 24 1.0 28 1.0 31 1.0  
 24 25 1.0 29 1.0 32 1.0  
 25 26 1.0 30 1.0  
 26  
 27  
 28  
 29  
 30  
 31  
 32  
 33 34 1.0 38 1.0  
 34 35 1.0 36 1.0 37 1.0  
 35  
 36  
 37  
 38 39 1.0 40 1.0 41 1.0  
 39  
 40  
 41  
 42 43 1.0  
 43  
 44 45 1.0  
 45  
 46  
 47  
 48 49 1.0  
 49  
 50 51 1.0  
 51

**Ac-Pro2-NMe2-trans-xx-5HF**

M062X/6311pp2d2p/H2O optimized

|   |   |             |             |             |
|---|---|-------------|-------------|-------------|
| 0 | 1 |             |             |             |
| C |   | -4.34747500 | 0.91288200  | -0.69567800 |
| C |   | -3.10706400 | 0.62971100  | 0.09615200  |
| O |   | -2.46162900 | 1.52255800  | 0.68380500  |
| H |   | -5.21019500 | 0.46447800  | -0.20308700 |
| N |   | -2.68191500 | -0.62945100 | 0.15901100  |
| C |   | -1.46229600 | -0.96820200 | 0.88192500  |
| C |   | -0.29650500 | -0.12053600 | 0.42649400  |
| O |   | -0.18588900 | 0.19852900  | -0.78559100 |
| C |   | -1.22386600 | -2.44203700 | 0.50349900  |
| C |   | -2.64369800 | -2.96533700 | 0.27758300  |

|   |             |             |             |
|---|-------------|-------------|-------------|
| C | -3.33694100 | -1.80588900 | -0.43410200 |
| H | -3.15126700 | -1.82112700 | -1.50795400 |
| H | -1.62317500 | -0.85398500 | 1.95174100  |
| H | -0.67174500 | -2.96810900 | 1.27617800  |
| H | -3.12829500 | -3.15754600 | 1.23432700  |
| H | -4.40787600 | -1.77603300 | -0.25294400 |
| H | -0.65378700 | -2.48640600 | -0.42704000 |
| H | -2.66374600 | -3.87714100 | -0.31229200 |
| N | 0.65142400  | 0.17558000  | 1.29246700  |
| C | 1.91668500  | 0.78358500  | 0.85876000  |
| C | 2.51439000  | 0.01202100  | -0.30751900 |
| O | 2.32853200  | -1.23417500 | -0.37222800 |
| C | 2.79843900  | 0.67705200  | 2.11391200  |
| C | 1.78606000  | 0.80274300  | 3.25084300  |
| C | 0.59461000  | -0.01423800 | 2.75915400  |
| H | 0.70468400  | -1.07226500 | 2.98945000  |
| H | 1.73807900  | 1.82141200  | 0.58442500  |
| H | 3.56986400  | 1.44142900  | 2.13228400  |
| H | 1.49489000  | 1.84437000  | 3.37960300  |
| H | -0.35008800 | 0.35808100  | 3.14402900  |
| H | 3.27358100  | -0.30419500 | 2.13978200  |
| H | 2.16950400  | 0.42837800  | 4.19540400  |
| N | 3.25161700  | 0.65875100  | -1.18270100 |
| C | 3.86922600  | -0.04085000 | -2.30852400 |
| H | 4.94151400  | 0.14003000  | -2.28909800 |
| H | 3.45611400  | 0.34888900  | -3.23730100 |
| H | 3.67693900  | -1.10336000 | -2.23662200 |
| C | 3.50080800  | 2.10433700  | -1.11190700 |
| H | 2.61953500  | 2.65901200  | -1.42449100 |
| H | 4.32387600  | 2.32610200  | -1.78285100 |
| H | 3.79472400  | 2.39790000  | -0.10843300 |
| F | 1.16301000  | -2.26788800 | -2.37169400 |
| H | 1.60069800  | -1.86594400 | -1.62951800 |
| F | 1.85901100  | -2.62463600 | 1.62435300  |
| H | 2.02180100  | -2.06997100 | 0.85211500  |
| H | -4.25849900 | 0.47642900  | -1.68952900 |
| H | -4.49275500 | 1.98552100  | -0.77064700 |
| F | -1.77906600 | -0.23020400 | -2.67564800 |
| H | -1.19200000 | -0.12356700 | -1.92660000 |
| F | -3.17816600 | 3.83187400  | 0.45505700  |
| H | -2.89515400 | 2.89536500  | 0.54518900  |
| F | 0.35625700  | 2.56924900  | -1.41019400 |
| H | 0.15313400  | 1.66579000  | -1.17587000 |

1 2 1.0 4 1.0 46 1.0 47 1.0

2 3 2.0 5 1.5

3

4

5 6 1.0 11 1.0

6 7 1.0 9 1.0 13 1.0

7 8 2.0 19 2.0

8

9 10 1.0 14 1.0 17 1.0

10 11 1.0 15 1.0 18 1.0

11 12 1.0 16 1.0

12

13

14

15

16

17

18

19 20 1.0 25 1.0

20 21 1.0 23 1.0 27 1.0

21 22 2.0 33 2.0

22

23 24 1.0 28 1.0 31 1.0

24 25 1.0 29 1.0 32 1.0  
25 26 1.0 30 1.0  
26  
27  
28  
29  
30  
31  
32  
33 34 1.0 38 1.0  
34 35 1.0 36 1.0 37 1.0  
35  
36  
37  
38 39 1.0 40 1.0 41 1.0  
39  
40  
41  
42 43 1.0  
43  
44 45 1.0  
45  
46  
47  
48 49 1.0  
49  
50 51 1.0  
51  
52 53 1.0  
53

#### Ac-Pro2-NMe2-trans-xx-6HF

M062X/6311pp2d2p/H2O optimized

0 1  
C 4.31214535 -0.28600028 -1.10872268  
C 3.14375302 -0.23232714 -0.17562245  
O 2.75351630 -1.26968236 0.42452591  
H 5.16955277 0.19701765 -0.63890248  
N 2.53003007 0.92516686 0.00138733  
C 1.35384157 1.08143414 0.85713998  
C 0.20746580 0.19156138 0.42361117  
O 0.16170883 -0.29178735 -0.73703900  
C 0.96236699 2.56214282 0.66700887  
C 2.29044165 3.23012143 0.31874944  
C 2.96149109 2.20700964 -0.58869281  
H 2.59579153 2.26973504 -1.61411080  
H 1.62016309 0.86919347 1.89170097  
H 0.47996891 2.96530159 1.55178992  
H 2.88676307 3.37561330 1.21885544  
H 4.04454978 2.27768260 -0.58509562  
H 0.26716833 2.64604209 -0.17040307  
H 2.15857971 4.18895559 -0.17378673  
N -0.78920895 0.01323709 1.26435566  
C -1.98754749 -0.73046643 0.85479566  
C -2.56831866 -0.15863727 -0.42703070  
O -2.47411675 1.08130940 -0.63568827  
C -2.94071995 -0.53871523 2.04507384  
C -1.98160283 -0.43371474 3.23010284  
C -0.84243587 0.42138776 2.68428676  
H -1.07532088 1.48283386 2.74021243  
H -1.72194154 -1.77808401 0.72613518  
H -3.65050872 -1.35669682 2.12737592  
H -1.60630865 -1.42073620 3.49839146  
H 0.10532708 0.21021441 3.16729188  
H -3.49059106 0.39523753 1.92240942

|   |             |             |             |
|---|-------------|-------------|-------------|
| H | -2.44284836 | 0.01658736  | 4.10403509  |
| N | -3.20421093 | -0.96463576 | -1.24871669 |
| C | -3.83584907 | -0.44384466 | -2.46093543 |
| H | -4.82054881 | -0.89291921 | -2.55760762 |
| H | -3.23299123 | -0.70466126 | -3.32955589 |
| H | -3.93378360 | 0.63256858  | -2.39246054 |
| C | -3.28782510 | -2.41561840 | -1.03401390 |
| H | -2.31206409 | -2.87955230 | -1.15704013 |
| H | -3.96865896 | -2.81800120 | -1.77579536 |
| H | -3.68842089 | -2.63746164 | -0.04815912 |
| F | -1.63503270 | 1.99590167  | -2.83068355 |
| H | -1.96482632 | 1.64600030  | -2.00811727 |
| F | -2.20841630 | 2.76885811  | 1.16441481  |
| H | -2.29194735 | 2.09916408  | 0.47674309  |
| H | 4.08139820  | 0.23739885  | -2.03345494 |
| H | 4.55909636  | -1.32190598 | -1.31689430 |
| F | 1.59100588  | 0.24640759  | -2.73360284 |
| H | 1.06191632  | 0.08394701  | -1.95367085 |
| F | 3.74724455  | -3.46178738 | -0.19401558 |
| H | 3.36670160  | -2.61015333 | 0.04512438  |
| F | -0.01952450 | -2.82678933 | -0.86447130 |
| H | 0.06628721  | -1.88137316 | -0.84597785 |
| F | 1.39270647  | -1.66690637 | 2.47913461  |
| H | 1.91726846  | -1.49419994 | 1.69590545  |

1 2 1.0 4 1.0 46 1.0 47 1.0

2 3 2.0 5 2.0

3

4

5 6 1.0 11 1.0

6 7 1.0 9 1.0 13 1.0

7 8 2.0 19 1.5

8

9 10 1.0 14 1.0 17 1.0

10 11 1.0 15 1.0 18 1.0

11 12 1.0 16 1.0

12

13

14

15

16

17

18

19 20 1.0 25 1.0

20 21 1.0 23 1.0 27 1.0

21 22 2.0 33 1.5

22

23 24 1.0 28 1.0 31 1.0

24 25 1.0 29 1.0 32 1.0

25 26 1.0 30 1.0

26

27

28

29

30

31

32

33 34 1.0 38 1.0

34 35 1.0 36 1.0 37 1.0

35

36

37

38 39 1.0 40 1.0 41 1.0

39

40

41

42 43 1.0



43  
44 45 1.0  
45  
46  
47  
48 49 1.0  
49  
50 51 1.0  
51  
52 53 1.0  
53  
54 55 1.0  
55

**Ac-Pro2-NMe2-trans-xx-HF212**

M062X/6311pp2d2p/H2O optimized

O 1  
C 4.29758257 -0.62001245 1.03466306  
C 3.14473962 0.01775956 0.32425537  
O 2.84564079 1.22304840 0.54318751  
H 5.11173324 -0.78578954 0.32874760  
N 2.45194651 -0.70626665 -0.53618527  
C 1.29000026 -0.18655063 -1.25646932  
C 0.16616230 0.21125244 -0.31681797  
O 0.11097517 -0.18906033 0.85857672  
C 0.82777442 -1.38113571 -2.11963379  
C 2.09107782 -2.22562763 -2.27272655  
C 2.75543127 -2.09935356 -0.90762576  
H 2.30904570 -2.76967769 -0.17161973  
H 1.58908225 0.66251405 -1.86945295  
H 0.40077876 -1.05167983 -3.06163792  
H 2.74054837 -1.80340803 -3.03864302  
H 3.82845117 -2.25813299 -0.93652481  
H 0.06343588 -1.94242008 -1.57948753  
H 1.87371481 -3.25895706 -2.52722038  
N -0.82873477 0.92254491 -0.82919814  
C -1.98637952 1.23828951 0.00787559  
C -2.56607657 -0.02915988 0.60876436  
O -2.62061830 -1.06609730 -0.10806813  
C -2.95620771 1.90806287 -0.97647344  
C -2.00863339 2.59627744 -1.96006161  
C -0.89346966 1.57019777 -2.15218485  
H -1.15848887 0.83105549 -2.90617449  
H -1.67607380 1.93003899 0.78720673  
H -3.63533102 2.58926398 -0.47181265  
H -1.60088119 3.50370333 -1.51538819  
H 0.05904914 2.03303307 -2.38940711  
H -3.53901113 1.14304374 -1.49048277  
H -2.49203078 2.85246500 -2.89831385  
N -3.04260287 -0.00748306 1.83510232  
C -3.66437605 -1.20200111 2.40612949  
H -4.52219436 -0.89525122 2.99771364  
H -2.95127360 -1.72365317 3.04351241  
H -3.98984068 -1.86107231 1.61008350  
C -2.87045056 1.14158524 2.73076485  
H -1.81584551 1.30408209 2.94414479  
H -3.38431615 0.91713475 3.65854978  
H -3.30867742 2.03952411 2.30346655  
F -1.69028279 -3.21407061 0.82494019  
H -2.05875923 -2.40618067 0.47547223  
F -2.41160182 -1.11635907 -2.57635476  
H -2.46797104 -1.06530899 -1.61411873  
H 3.99592692 -1.57857780 1.45042192  
H 4.64158731 0.03754251 1.82610154  
F 1.53636641 -1.77761537 2.07269053

|   |            |             |             |
|---|------------|-------------|-------------|
| H | 0.99743855 | -1.15574363 | 1.55714099  |
| F | 4.11685816 | 2.48726442  | 2.25568744  |
| H | 3.62646748 | 1.98968632  | 1.59030704  |
| F | 1.43537806 | 2.91382861  | -0.62687932 |
| H | 1.96768064 | 2.24313804  | -0.19369912 |

1 2 1.0 4 1.0 46 1.0 47 1.0  
2 3 2.0 5 2.0  
3  
4  
5 6 1.0 11 1.0  
6 7 1.0 9 1.0 13 1.0  
7 8 2.0 19 1.5  
8  
9 10 1.0 14 1.0 17 1.0  
10 11 1.0 15 1.0 18 1.0  
11 12 1.0 16 1.0  
12  
13  
14  
15  
16  
17  
18  
19 20 1.0 25 1.0  
20 21 1.0 23 1.0 27 1.0  
21 22 2.0 33 1.5  
22  
23 24 1.0 28 1.0 31 1.0  
24 25 1.0 29 1.0 32 1.0  
25 26 1.0 30 1.0  
26  
27  
28  
29  
30  
31  
32  
33 34 1.0 38 1.0  
34 35 1.0 36 1.0 37 1.0  
35  
36  
37  
38 39 1.0 40 1.0 41 1.0  
39  
40  
41  
42 43 1.0  
43  
44 45 1.0  
45  
46  
47  
48 49 1.0  
49  
50 51 1.0  
51  
52 53 1.0  
53

**Ac-Pro2-NMe2-trans-xx-HF221**

M062X/6311pp2d2p/H2O optimized

|     |             |            |             |
|-----|-------------|------------|-------------|
| 0 1 |             |            |             |
| C   | -4.25857628 | 0.90430404 | -0.74406594 |

|   |             |             |             |
|---|-------------|-------------|-------------|
| C | -3.05946204 | 0.40967595  | 0.00220737  |
| O | -2.55475065 | 1.09526914  | 0.93168799  |
| H | -5.13124923 | 0.31653636  | -0.45763997 |
| N | -2.54154804 | -0.75747629 | -0.33900657 |
| C | -1.34482784 | -1.31399546 | 0.29296054  |
| C | -0.14654274 | -0.39561662 | 0.15546157  |
| O | -0.12365765 | 0.50322842  | -0.72414610 |
| C | -1.09966084 | -2.62268943 | -0.48686002 |
| C | -2.49740851 | -3.01074591 | -0.96419078 |
| C | -3.11359006 | -1.67097633 | -1.34625558 |
| H | -2.80257513 | -1.34742498 | -2.33996342 |
| H | -1.54607928 | -1.50884512 | 1.34520760  |
| H | -0.61259936 | -3.37059411 | 0.13087456  |
| H | -3.06429203 | -3.46210904 | -0.15065128 |
| H | -4.19731324 | -1.66567121 | -1.28668900 |
| H | -0.45367079 | -2.41620779 | -1.34144744 |
| H | -2.47486488 | -3.70194117 | -1.80153729 |
| N | 0.89615035  | -0.61707638 | 0.92556054  |
| C | 2.11911592  | 0.18685510  | 0.78611517  |
| C | 2.63872169  | 0.14723190  | -0.64708064 |
| O | 2.48545962  | -0.88110155 | -1.33252487 |
| C | 3.09170303  | -0.48594951 | 1.76580074  |
| C | 2.16535116  | -1.03526436 | 2.84968797  |
| C | 0.97755525  | -1.56646917 | 2.05595515  |
| H | 1.16813661  | -2.56378583 | 1.66382626  |
| H | 1.88971644  | 1.20735487  | 1.08685126  |
| H | 3.83434210  | 0.21238105  | 2.14168392  |
| H | 1.83873235  | -0.23212871 | 3.50952347  |
| H | 0.05555536  | -1.54782348 | 2.62687373  |
| H | 3.60394268  | -1.30478053 | 1.25894465  |
| H | 2.63307802  | -1.81254251 | 3.44689440  |
| N | 3.27543072  | 1.21170355  | -1.11543964 |
| C | 3.74298838  | 1.22621211  | -2.49750759 |
| H | 4.81309898  | 1.02312410  | -2.53445660 |
| H | 3.55457756  | 2.21440019  | -2.91186500 |
| H | 3.20921652  | 0.47861968  | -3.07118377 |
| C | 3.61503481  | 2.39653155  | -0.32947054 |
| H | 2.87522265  | 3.17993522  | -0.48004661 |
| H | 4.58853074  | 2.74598444  | -0.66504643 |
| H | 3.69433393  | 2.16371003  | 0.72628007  |
| F | 2.04082837  | -3.09646743 | -0.43278519 |
| H | 2.18655336  | -2.18834758 | -0.77077829 |
| H | -4.10435923 | 0.79691208  | -1.81550630 |
| H | -4.43452570 | 1.94533193  | -0.49403432 |
| F | -1.65977964 | 0.85785671  | -2.66500207 |
| H | -1.09472641 | 0.67457918  | -1.91251585 |
| F | -3.42871280 | 3.38142341  | 1.35200386  |
| H | -3.09526650 | 2.49259114  | 1.18747701  |
| F | 0.50363940  | 2.88655406  | -0.16384513 |
| H | 0.27850582  | 1.98913207  | -0.38669013 |
| F | -1.05908173 | 0.56197366  | 2.85731936  |
| H | -1.63311717 | 0.74569870  | 2.11191635  |

1 2 1.0 4 1.0 44 1.0 45 1.0  
2 3 2.0 5 2.0  
3  
4  
5 6 1.0 11 1.0  
6 7 1.0 9 1.0 13 1.0  
7 8 2.0 19 1.5  
8  
9 10 1.0 14 1.0 17 1.0  
10 11 1.0 15 1.0 18 1.0  
11 12 1.0 16 1.0  
12  
13  
14

15  
 16  
 17  
 18  
 19 20 1.0 25 1.0  
 20 21 1.0 23 1.0 27 1.0  
 21 22 2.0 33 1.5  
 22  
 23 24 1.0 28 1.0 31 1.0  
 24 25 1.0 29 1.0 32 1.0  
 25 26 1.0 30 1.0  
 26  
 27  
 28  
 29  
 30  
 31  
 32  
 33 34 1.0 38 1.0  
 34 35 1.0 36 1.0 37 1.0  
 35  
 36  
 37  
 38 39 1.0 40 1.0 41 1.0  
 39  
 40  
 41  
 42 43 1.0  
 43  
 44  
 45  
 46 47 1.0  
 47  
 48 49 1.0  
 49  
 50 51 1.0  
 51  
 52 53 1.0  
 53

**Ac-Pro2-NMe2-trans-xx-HF3**

M062X/6311pp2d2p/H2O optimized

|     |             |             |             |
|-----|-------------|-------------|-------------|
| 0 1 |             |             |             |
| C   | -4.38521744 | -0.69361422 | -1.69057647 |
| C   | -3.16644422 | 0.12097209  | -1.34702825 |
| O   | -2.49972167 | 0.71201177  | -2.19532050 |
| H   | -5.28100943 | -0.22017500 | -1.28841884 |
| N   | -2.82441225 | 0.17418817  | -0.04406240 |
| C   | -1.64861505 | 0.91769968  | 0.37031100  |
| C   | -0.39472143 | 0.42194666  | -0.31665825 |
| O   | -0.24844602 | -0.77081233 | -0.63724950 |
| C   | -1.54602053 | 0.62346882  | 1.88068059  |
| C   | -2.99716987 | 0.34610161  | 2.27675278  |
| C   | -3.53569700 | -0.43815975 | 1.08249728  |
| H   | -3.28413409 | -1.49818889 | 1.14936590  |
| H   | -1.78955923 | 1.98028653  | 0.17886842  |
| H   | -1.08081217 | 1.44384249  | 2.41927895  |
| H   | -3.54310699 | 1.28386475  | 2.37878580  |
| H   | -4.61096298 | -0.33505361 | 0.96130816  |
| H   | -0.94023939 | -0.27302704 | 2.03020587  |
| H   | -3.07958877 | -0.20822519 | 3.20766865  |
| N   | 0.61794436  | 1.27319550  | -0.44932883 |
| C   | 1.92220447  | 0.78413567  | -0.89607035 |
| C   | 2.33671985  | -0.42898890 | -0.08154869 |
| O   | 2.13007671  | -0.41722635 | 1.16352778  |

|   |             |             |             |
|---|-------------|-------------|-------------|
| C | 2.84978250  | 1.98195507  | -0.64134115 |
| C | 1.92198863  | 3.17803144  | -0.85875159 |
| C | 0.60331819  | 2.73124646  | -0.22842353 |
| H | 0.57459810  | 2.94219656  | 0.83944820  |
| H | 1.87189168  | 0.54305080  | -1.95439361 |
| H | 3.71166445  | 1.97133980  | -1.30240142 |
| H | 1.78135810  | 3.35237698  | -1.92489141 |
| H | -0.25805004 | 3.17809560  | -0.71714768 |
| H | 3.19662636  | 1.95927077  | 0.39205752  |
| H | 2.30082051  | 4.08959862  | -0.40560685 |
| N | 2.94944168  | -1.43285337 | -0.67195136 |
| C | 3.41116603  | -2.57648787 | 0.11426094  |
| H | 4.35659919  | -2.91856637 | -0.29644837 |
| H | 2.68021903  | -3.38287760 | 0.06315234  |
| H | 3.55153132  | -2.27802843 | 1.14639967  |
| C | 3.07676629  | -1.53398613 | -2.12993068 |
| H | 2.09451258  | -1.59466102 | -2.59426967 |
| H | 3.62412460  | -2.44296546 | -2.35270253 |
| H | 3.63100999  | -0.69058892 | -2.53337290 |
| F | 1.00484914  | -2.38300804 | 2.25883783  |
| H | 1.44949309  | -1.64741077 | 1.84245146  |
| F | 1.56564343  | 1.58540519  | 2.50611097  |
| H | 1.76282606  | 0.82093972  | 1.95008855  |
| H | -4.30459892 | -1.69012501 | -1.25837322 |
| H | -4.46892053 | -0.76137743 | -2.77005596 |
| F | -1.86214006 | -2.61157376 | -0.57442097 |
| H | -1.26591646 | -1.84042291 | -0.57105340 |

1 2 1.0 4 1.0 46 1.0 47 1.0  
2 3 2.0 5 2.0  
3  
4  
5 6 1.0 11 1.0  
6 7 1.0 9 1.0 13 1.0  
7 8 2.0 19 1.5  
8  
9 10 1.0 14 1.0 17 1.0  
10 11 1.0 15 1.0 18 1.0  
11 12 1.0 16 1.0  
12  
13  
14  
15  
16  
17  
18  
19 20 1.0 25 1.0  
20 21 1.0 23 1.0 27 1.0  
21 22 2.0 33 1.5  
22  
23 24 1.0 28 1.0 31 1.0  
24 25 1.0 29 1.0 32 1.0  
25 26 1.0 30 1.0  
26  
27  
28  
29  
30  
31  
32  
33 34 1.0 38 1.0  
34 35 1.0 36 1.0 37 1.0  
35  
36  
37  
38 39 1.0 40 1.0 41 1.0  
39

40  
41  
42 43 1.0  
43  
44 45 1.0  
45  
46  
47  
48 49 1.0  
49

**Ac-Pro2-NMe2-trans-xx**

M062X/6311pp2d2p/H2O optimized

0 1  
C 4.13083876 0.51434263 2.09014962  
C 2.98966987 0.71673716 1.12595042  
O 2.23576430 1.68858661 1.19120848  
H 5.08337397 0.64606175 1.57633419  
N 2.82671892 -0.21824538 0.17335512  
C 1.73398020 -0.09972276 -0.78526212  
C 0.38831572 -0.05884508 -0.06807924  
O 0.13211510 -0.87577808 0.81273074  
C 1.85940305 -1.38006444 -1.62844701  
C 3.34350466 -1.73792589 -1.51496872  
C 3.66279489 -1.39675719 -0.06199049  
H 3.37192754 -2.21067548 0.60641693  
H 1.88151369 0.78787341 -1.39701510  
H 1.52385988 -1.22494879 -2.65035508  
H 3.93688743 -1.10782967 -2.17761300  
H 4.71281503 -1.16763521 0.10032469  
H 1.25366373 -2.16441607 -1.17434805  
H 3.54659006 -2.77935389 -1.75049281  
N -0.52337701 0.82936929 -0.49137086  
C -1.86520242 0.78247283 0.07529655  
C -2.52427759 -0.56876952 -0.21188960  
O -2.24901748 -1.17769275 -1.24029475  
C -2.59903210 1.92072965 -0.65007921  
C -1.47829403 2.90934269 -0.97090774  
C -0.31225102 1.99956394 -1.35249000  
H -0.35857134 1.71573339 -2.40566420  
H -1.80219127 0.96439449 1.14690265  
H -3.39544276 2.34728328 -0.04566517  
H -1.21856321 3.48249074 -0.08081912  
H 0.65131380 2.45632707 -1.14431579  
H -3.03109265 1.53504373 -1.57454625  
H -1.73768201 3.60226588 -1.76688324  
N -3.44593853 -0.99438125 0.67494453  
C -4.09139137 -2.28463708 0.48995835  
H -5.17276421 -2.15682017 0.44571078  
H -3.85097141 -2.94234120 1.32625574  
H -3.73937366 -2.72895552 -0.43306251  
C -3.76581379 -0.29180972 1.91193201  
H -3.01226525 -0.46734656 2.68126068  
H -4.72004189 -0.66660445 2.27298751  
H -3.87348902 0.77678140 1.74767373  
H 4.11466690 -0.49099345 2.50887848  
H 4.04964863 1.24759734 2.88534074

1 2 1.0 4 1.0 42 1.0 43 1.0  
2 3 2.0 5 2.0  
3  
4  
5 6 1.0 11 1.0  
6 7 1.0 9 1.0 13 1.0  
7 8 2.0 19 1.5

8  
 9 10 1.0 14 1.0 17 1.0  
 10 11 1.0 15 1.0 18 1.0  
 11 12 1.0 16 1.0  
 12  
 13  
 14  
 15  
 16  
 17  
 18  
 19 20 1.0 25 1.0  
 20 21 1.0 23 1.0 27 1.0  
 21 22 2.0 33 1.5  
 22  
 23 24 1.0 28 1.0 31 1.0  
 24 25 1.0 29 1.0 32 1.0  
 25 26 1.0 30 1.0  
 26  
 27  
 28  
 29  
 30  
 31  
 32  
 33 34 1.0 38 1.0  
 34 35 1.0 36 1.0 37 1.0  
 35  
 36  
 37  
 38 39 1.0 40 1.0 41 1.0  
 39  
 40  
 41  
 42  
 43

**Ac-Pro2-NMe2-trans-xx-P2HFHF**

M062X/6311pp2d2p/H2O optimized

|     |             |             |             |
|-----|-------------|-------------|-------------|
| 0 1 |             |             |             |
| C   | 4.42055601  | -0.94786981 | -1.91707204 |
| C   | 3.23244497  | -0.97040037 | -0.98987836 |
| O   | 2.53631126  | -1.97457642 | -0.83283645 |
| H   | 5.34267378  | -0.90805491 | -1.33625326 |
| N   | 2.95946075  | 0.16460746  | -0.32260716 |
| C   | 1.83390007  | 0.20884430  | 0.60384948  |
| C   | 0.53144477  | -0.14238741 | -0.10293504 |
| O   | 0.20877453  | 0.41726588  | -1.14723817 |
| C   | 1.82071688  | 1.67019282  | 1.07860111  |
| C   | 3.28566146  | 2.09334753  | 0.94841825  |
| C   | 3.72306679  | 1.41527747  | -0.34739174 |
| H   | 3.44680136  | 2.01258911  | -1.21914188 |
| H   | 2.01708304  | -0.47100842 | 1.43403127  |
| H   | 1.41926895  | 1.76119065  | 2.08344616  |
| H   | 3.86732988  | 1.70004381  | 1.78223940  |
| H   | 4.79103086  | 1.21559114  | -0.38323120 |
| H   | 1.20241448  | 2.25749239  | 0.39912698  |
| H   | 3.41371844  | 3.17201823  | 0.91395367  |
| N   | -0.29604555 | -1.00608981 | 0.51020667  |
| C   | -1.61217357 | -1.24195162 | -0.06300337 |
| C   | -2.36398635 | 0.06463570  | -0.23245860 |
| O   | -2.20419205 | 0.97762323  | 0.62219259  |
| C   | -2.28875051 | -2.15052164 | 0.97521416  |
| C   | -1.11069011 | -2.95594640 | 1.52451506  |
| C   | 0.01359133  | -1.92347295 | 1.61747953  |

|   |             |             |             |
|---|-------------|-------------|-------------|
| H | -0.01288203 | -1.38682410 | 2.56553389  |
| H | -1.50890242 | -1.74347072 | -1.02324129 |
| H | -3.07216834 | -2.76164845 | 0.53515442  |
| H | -0.83669249 | -3.73958007 | 0.81847597  |
| H | 0.99480966  | -2.36746391 | 1.47033005  |
| H | -2.72408460 | -1.53476999 | 1.76393956  |
| H | -1.32574415 | -3.41523793 | 2.48534918  |
| N | -3.22077279 | 0.19159236  | -1.22653189 |
| C | -4.00530291 | 1.41752437  | -1.36904588 |
| H | -4.98436576 | 1.15607778  | -1.75892890 |
| H | -3.51237007 | 2.10420492  | -2.05631523 |
| H | -4.11769044 | 1.89338983  | -0.40141048 |
| C | -3.35224374 | -0.81380814 | -2.28585136 |
| H | -2.45887948 | -0.83702029 | -2.90738938 |
| H | -4.20083015 | -0.53846206 | -2.90203303 |
| H | -3.53912139 | -1.79871540 | -1.86679210 |
| F | -1.80049521 | 3.34245339  | -0.09648513 |
| H | -1.97080653 | 2.43830549  | 0.16888135  |
| F | -0.95833184 | 0.84937978  | 2.77278748  |
| H | -1.40917815 | 0.83788055  | 1.92106516  |
| H | 4.39793509  | -0.07369533 | -2.56611962 |
| H | 4.41503649  | -1.85338543 | -2.51445629 |

1 2 1.0 4 1.0 46 1.0 47 1.0  
2 3 2.0 5 2.0  
3  
4  
5 6 1.0 11 1.0  
6 7 1.0 9 1.0 13 1.0  
7 8 2.0 19 1.5  
8  
9 10 1.0 14 1.0 17 1.0  
10 11 1.0 15 1.0 18 1.0  
11 12 1.0 16 1.0  
12  
13  
14  
15  
16  
17  
18  
19 20 1.0 25 1.0  
20 21 1.0 23 1.0 27 1.0  
21 22 2.0 33 1.5  
22  
23 24 1.0 28 1.0 31 1.0  
24 25 1.0 29 1.0 32 1.0  
25 26 1.0 30 1.0  
26  
27  
28  
29  
30  
31  
32  
33 34 1.0 38 1.0  
34 35 1.0 36 1.0 37 1.0  
35  
36  
37  
38 39 1.0 40 1.0 41 1.0  
39  
40  
41  
42 43 1.0  
43  
44 45 1.0



45  
46  
47
